# Supplementary material
Source: publisher figshare collection journal article supplement (https://gsapubs.figshare.com/articles/dataset/_/21676790)
Supplement: Supplementary file 1 [file 1]

## Sheet: Geochemistry
Supplemental Table S6. Whole-rock major (wt.%) and trace (ppm) element data of the regional Jurassic-Cretaceous rocks
	Jurassic rocks
Reference	Li et al., 2020b										Li et al., 2017b										Liu et al., 2017					Yan et al., 2016															Liu et al., 2010						Zhu et al., 2011
Sample	17AD-01	17AD-02	17AD-03	17AD-06	17AD-11	17AD-05	17AD-07	17AD-08	17AD-09	17AD-10	13AD-31	13AD-32	13AD-33	13AD-34	13AD-35	13AD-38	13AD-39	13AD-40	13AD-41	13AD-42	09028-1	1008A	1008G	1023D	1024A	AD51	AD52	AD53	AD54	AD33	AD34	AD35	AD02	AD03	AD04	AD05	AD45	AD46	AD47	AD48	NR13-1	NR13-6	NR12-2	NR13-3	NR14-1	NR17-1	NR04-1	NR13-3	NR15-1
Lithology	Dacite					Rhyolite					Dacite		Rhyolite			Dacite			Rhyolite	Dacite	Granite	Diorite		Granite		Gabbro				Diorite							Granodiorite				Diorite			Granodiorite	Granite		Granodiorite
Locality	Amdo										Amdo										Amdo					Amdo															Amdo						Amdo
Age (Ma)	181										181								182	181	185	183	183	175	178	177				174			175				177				175				176		186	175	185
SiO2	70.31	67.13	71.32	69.96	64.34	71.41	75.63	73.79	77.04	80.52	63.11	62.5	76.15	75.39	73.31	66.84	67.79	67.33	75.3	65.42	68.36	61.63	62.3	70.17	69.53	47.1	54.52	47.03	47.3	56.45	54.69	55.92	55.88	52.93	56.3	56.27	62.16	65.99	65.12	62.9	57.43	57.49	61.51	64.07	73.89	75.8	71.9	64.07	69.54
Al2O3	12.93	13.39	12.14	14.24	14.87	13.64	11.4	13.07	11.27	10.17	14.62	14.72	11.78	11.85	12.65	14.42	13.97	13.66	12.39	15.4	15.54	16.22	16.91	14.15	14.52	14.43	14.06	16.56	14.93	11.08	9.94	10.82	17.24	17.05	17.32	17.73	18.15	16.09	15.77	16.78	14.29	13.98	16.03	15.43	13.45	13.07	13.86	15.43	13.39
CaO	3.48	7.53	4.11	1.8	4.02	1.35	1.72	0.95	0.74	0.75	3.62	3.24	0.7	0.59	1.16	2.6	2.94	3.96	1.14	3.9	2.8	3.32	3.7	2.11	2.78	13.75	8.79	11.99	12.13	6.05	8	6.8	6.77	7.51	6.4	6.64	3.63	2.02	2.85	3.04	5.5	5.57	4.93	2.68	0.8	0.72	2	2.68	2.37
Fe2O3T	4.18	3.77	4.26	3.42	5.44	3.56	2.65	2.98	2.45	1.88	6.36	6.69	2.46	2.41	3.04	4.78	4.51	4.37	2.35	4.66	4.6245	6.1088	5.6014	3.0111	3.7128	11.86	10.95	11.26	11.66	8.02	7.96	7.41	7.4	8.74	7.26	7.21	5.6	4.6	6.02	6.34	7.2	7.21	6.54	4.97	1.61	0.97	3.24	4.97	2.95
K2O	0.49	0.07	0.27	1.92	0.34	2.57	1	1.18	0.2	0.16	0.11	0.09	1.39	1.64	1.4	1.24	1.11	0.91	0.56	0.64	2.7	2.75	3.59	5.58	3.98	0.78	1.15	1.29	1.09	5.79	4.19	5.17	1.81	1.99	1.99	1.93	2.67	4.98	2.75	3.02	4.82	4.58	2.03	6.02	5.65	5.47	3.94	6.02	5.69
MgO	1.48	1.55	1.01	1.23	2.14	1.26	0.38	0.69	0.74	0.44	3.05	3	0.49	0.46	0.84	1.94	1.73	1.65	0.33	1.24	1.57	2.5	2.42	1.36	1.19	7.24	4.84	7.19	7.88	8.3	10.24	9.09	4.77	5.5	4.46	4.04	2.15	1.81	2.32	2.46	5.67	6	3.15	2.99	0.5	0.23	0.97	2.99	1.71
MnO	0.03	0.07	0.04	0.09	0.06	0.11	0.05	0.02	0.03	0.03	0.07	0.07	0.03	0.03	0.04	0.05	0.04	0.04	0.03	0.04	0.04	0.09	0.09	0.07	0.07	0.2	0.2	0.21	0.18	0.17	0.17	0.15	0.13	0.18	0.12	0.13	0.06	0.05	0.07	0.06	0.13	0.13	0.16	0.08	0.05	0.05	0.08	0.08	0.06
Na2O	4.09	3.09	4.37	4.41	5.04	3.3	4.97	5.48	5.54	5.09	5.31	5.6	5.7	5.42	5.54	4.79	4.87	4.77	5.81	5.55	3.39	3.07	2.99	2.43	3.07	2.2	2.99	1.97	2.47	1.15	1.32	1.23	3.22	3.1	3.15	3.35	3.56	2.48	2.86	3.1	1.79	1.72	3.47	1.96	2.42	3.24	3.2	1.96	2.22
P2O5	0.16	0.12	0.36	0.11	0.13	0.11	0.06	0.07	0.06	0.06	0.17	0.16	0.04	0.04	0.07	0.12	0.11	0.09	0.03	0.12	0.09	0.19	0.17	0.17	0.15	0.11	0.1	0.09	0.1	0.29	0.3	0.3	0.17	0.18	0.17	0.17	0.06	0.06	0.06	0.08	0.48	0.48	0.18	0.37	0.11	0.04	0.14	0.37	0.21
TiO2	0.5	0.51	0.57	0.57	0.65	0.54	0.42	0.49	0.43	0.39	0.87	0.88	0.48	0.43	0.5	0.59	0.56	0.57	0.46	0.58	0.45	0.79	0.68	0.45	0.51	1.26	1.18	1	1.08	1.13	1.33	1.27	0.97	1.03	1.08	1.01	0.76	0.63	0.83	0.85	1.14	1.19	0.8	0.84	0.13	0.07	0.45	0.84	0.5
LOI	1.88	3	1.72	1.92	2.74	2.36	1.26	1.46	1	0.8	2.93	3.06	0.91	0.95	1.2	2.48	2.32	2.18	1.27	1.98	0.66	2.52	1.6	1	0.94	0.63	0.78	0.98	0.77	1.13	1.42	1.4	1.22	1.36	1.32	1.09	0.76	0.86	0.92	0.94	1.14	1.18	1.02	1.01	0.92	0.51	0.57	1.01	0.87
La	15.7	12.5	18.2	16	13.1	8.1	17.6	14.6		11	8.87	8.41	13	13	16.7	12.4	12.9	11.9	12.5	15	58.7	61.54	64.92	47.47	43.4	4.13	4.67	3.86	2.75	32.23	59.7	65.9	31.4	23.1	18.5	18.9	60.7	21.8	52.5	67.9	83	56.4	21.4	86.6	46.8	27.2	43.7779	86.6351	61.5941
Ce	34.8	32	39.7	43.2	33.3	17.5	44.1	37		26.9	23.4	22.5	32.4	33.6	43.3	31.2	33.3	31.2	32.8	35.7	109.6	119.3	120.7	102.6	88.57	11	12.8	10.6	7.92	98.5	135	138	69	71.9	45.5	48.1	116	40.8	98.8	130	178	134	46.5	190	103	62.1	90.7263	190.018	126.415
Pr	4.65	4.15	5.55	6.35	4.97	2.43	6.56	5.61		3.95	3.54	3.43	4.77	4.94	6.37	4.37	4.57	4.35	4.73	5.17	11.38	12.53	12.64	12.11	10.06	1.76	2.11	1.58	1.34	16.4	18.7	17.5	8.84	9.52	6.02	6.64	13.7	4.61	11.15	15.4	23.4	18.3	5.98	22.9	11.6	7.28	11.0391	22.8842	15.2911
Nd	20.6	19.6	25.9	29.2	22.3	10.6	30.6	25.9		17.6	16.8	16.3	21.5	22.5	29.3	19.2	19.9	19.2	21.5	22	39.86	44.48	43.79	45.87	38.01	9.28	10.9	8.16	7.31	71.2	72.5	61.1	35.6	42.2	25	28.7	47.8	16.4	39.4	54	88.4	71.2	22.4	81.8	38.2	25.4	39.9486	81.8282	53.1012
Sm	4.69	4.33	6.2	7.1	5.04	2.45	7.37	6.2		4.06	4.29	4.22	5.42	5.67	7.44	4.47	4.65	4.57	5.37	4.93	6.82	7.4	6.96	7.97	7.41	3.13	4.11	2.68	2.55	15.7	11.9	9.04	7.65	10.3	5.52	6.68	9.36	3.03	7.12	10.2	15.2	12.1	4.46	13.1	6.83	5.29	8.42697	13.1264	8.56851
Eu	1.47	1.32	1.81	1.74	1.26	0.77	1.89	1.62		0.98	1.45	1.31	1.59	1.54	1.86	1.19	1.19	1.19	1.35	1.29	0.9	1.3	1.28	1.24	1.21	1.05	1.05	0.89	0.92	2.33	2.19	1.58	1.54	1.85	1.31	1.46	1.57	1.28	1.27	1.56	2.71	2.54	0.94	2.34	0.86	0.62	0.984336	2.34473	1.43177
Gd	5.15	4.19	7.04	7.48	5.08	2.49	7.64	6.6		4.19	4.41	4.2	5.38	5.56	7.43	4.32	4.54	4.4	5.39	4.42	5.9	5.85	5.34	5.49	6.38	3.63	5.05	3.03	3.04	12	8.5	6.78	7.11	9.96	5.22	6.63	9.1	2.73	6.1	9.21	10.5	8.49	4.14	8.95	5.76	4.38	8.12914	8.94634	6.31442
Tb	0.85	0.69	1.23	1.31	0.87	0.43	1.37	1.16		0.81	0.77	0.76	0.98	1.03	1.33	0.76	0.8	0.77	1.02	0.73	0.89	0.86	0.76	0.78	1	0.75	1.14	0.62	0.66	1.99	1.05	0.75	1.16	1.65	0.85	1.1	1.53	0.4	0.85	1.36	1.29	1.02	0.59	1.15	0.83	0.73	1.23625	1.14614	0.823641
Dy	5.32	4.21	7.72	8.57	5.45	2.61	8.66	7.5		5.48	4.8	4.75	6.3	6.6	8.41	4.71	5.13	4.94	6.65	4.23	5.05	4.55	4.32	4.28	5.98	5.1	7.88	4.17	4.62	11.48	4.95	3.34	7.07	10.2	5.3	6.74	9.25	2.27	3.96	6.95	6.62	5.23	3.67	6.06	4.56	4.71	7.58726	6.06331	4.31799
Ho	1.16	0.86	1.77	1.89	1.19	0.57	1.93	1.67		1.3	1.05	1.06	1.43	1.49	1.9	1.05	1.15	1.11	1.53	0.85	0.89	0.87	0.82	0.82	1.15	1.13	1.71	0.92	1.04	2.31	0.95	0.64	1.41	2.07	1.08	1.33	1.91	0.47	0.68	1.3	1.25	1	0.74	1.11	0.83	0.97	1.47817	1.1102	0.834705
Er	3.21	2.46	5.01	5.49	3.36	1.6	5.5	4.8		3.89	2.95	3.01	4.14	4.33	5.55	3.02	3.33	3.24	4.53	2.31	2.24	2.34	2.38	2.29	3.37	3.2	4.74	2.55	3	6.16	2.44	1.67	3.93	5.56	2.97	3.65	5.07	1.31	1.58	3.27	3.47	2.79	2.12	2.97	2.29	2.97	4.1892	2.9685	2.28631
Tm	0.48	0.36	0.77	0.87	0.54	0.24	0.86	0.76		0.64	0.45	0.47	0.64	0.69	0.86	0.46	0.51	0.5	0.7	0.34	0.27	0.33	0.33	0.32	0.5	0.47	0.7	0.37	0.45	0.91	0.34	0.24	0.53	0.78	0.42	0.49	0.67	0.2	0.2	0.43	0.46	0.41	0.3	0.39	0.32	0.48	0.612383	0.387432	0.327892
Yb	2.98	2.3	4.94	5.7	3.53	1.6	5.68	5		4.4	2.96	3.14	4.35	4.55	5.72	3.05	3.44	3.39	4.78	2.26	1.6	2.1	2.2	2.07	3.35	2.97	4.44	2.45	2.86	5.7	2.25	1.65	3.34	4.84	2.57	3	3.86	1.31	1.26	2.69	3.02	2.76	2.1	2.49	2.35	3.52	4.11682	2.48543	2.27718
Lu	0.47	0.34	0.8	0.94	0.58	0.26	0.93	0.8		0.72	0.47	0.5	0.71	0.74	0.94	0.49	0.56	0.56	0.75	0.35	0.22	0.31	0.33	0.28	0.49	0.46	0.65	0.37	0.44	0.82	0.35	0.27	0.5	0.71	0.39	0.45	0.57	0.21	0.2	0.41	0.43	0.41	0.33	0.32	0.31	0.54	0.624951	0.32478	0.307968
Y	32	25.8	57.6	54.5	34.2	16.1	55	47.2		34.6	25.7	26.1	35.5	37	48.4	27.7	30	28.9	38.4	19.7	26.74	22.77	22.69	22.08	32.85	28.2	44.5	22.4	25.5	57.5	23.1	14.1	40.1	58.2	30.3	37.7	49.1	11.2	15	31.9	33.6	27.1	21.3	27.3	24.5	29.2	44.3013	27.3313	23.7402
Ti											5232	5385	2902	2761	3065	3609	3462	3507	2849	3578	2991	4646	4185	2732	3086
Li																					40.11	24.5	25.91	11.34	52.18
Be																					1.45	3.54	4.1	5.13	4.7																4.31	4.55	4.79	4.26	6.69	5.58	5.17042	4.26145	5.04776
Sc	10.7	15.1	14.9	13.4	17.3	25.5	13.5	10.6		6.5	25.8	26.2	10.3	10.2	11.6	13.1	9.79	13.5	9.45	17.4	9.12	12.74	9.28	6.83	8.92	44.4	36.5	45.9	49.7	41.2	36	29.7	25.8	34.1	28	25.8	13.7	11.4	14.1	17.5	23.3	24.1	23	12.9	6.13	5.12	9.38575	12.9115	9.98734
V	88.8	82.6	26.5	38.3	162	138	39.9	22.9		20.4	206	202	25.1	23.1	25.6	120	106	126	23.4	93.2	71.63	102	105.9	51.74	58.25																153	165	126	97.3	14.7	5.93	40.4141	97.2788	58.7146
Cr	56.5	6.5	3.4	2.7	10.4	92.3	3.1	6		4.4	10.9	8.25	7.12	8.16	7.23	10.4	11.6	9.73	7.08	30.6	24.8	35.68	28.1	34.05	16.06	232	40.4	488	238	400	547	456	93.2	161	58.2	51.6	19.8	33.2	27.7	38.2	220	237	7.94	79.9	8.15	2.11	8.97654	79.8688	50.6253
Co	6.5	9	3	4.1	12.7	18.2	3.6	2.3		2	13.1	14.1	2.31	2.14	3.03	10.4	9.82	9.8	1.86	11.4	10.47	13.89	13.87	6.87	7.76	49.3	34.7	48.5	53.9	31.5	39.7	34.5	25.4	29.9	23.7	23.2	12.3	10.6	13.4	15.2	23.2	27.1	18.5	13.1	2.26	0.95	5.63994	13.1122	8.16949
Ni	7.4	9.3	3.8	2	5.9	33.3	1.2	2.7		2.1	5.39	4.51	1.09	3.37	1.03	8.05	8.09	4.79	2.09	19.7	15.63	21.35	17.71	13.52	9.17	89.4	39.1	144	92.3	120	152	131	35.4	43.2	22	21.9	15.6	19.5	19.4	25.2	58.2	61.5	8.7	30.4	4.8	1.5	5.79091	30.4139	22.3292
Ga	12.5	14.3	12.9	16	15.2	11.7	15.9	12.4		10.1	15.9	15	12.6	12.5	14.1	14.5	13.3	15	12.2	14.4	21.08	20.13	20.27	16.26	17.27	17.6	22.8	16.7	16.7	17.8	17.1	17.4	20.6	20.6	19.8	20	25	19.4	22.8	28.2	19.6	19.5	17.8	18.6	16.6	15.5	17.7791	18.6273	16.2598
Rb	14.27	1.66	5.15	31.79	2.48	19.5	24.45	15.62		0.81	0.85	0.73	12.2	17.4	10.9	10.4	8.52	6.38	4.96	6.56	207.8	137.9	217	291.8	249.7	17.6	32.9	42.7	16	323	211	331	89.4	91.1	102	95.1	208	245	218	267	223	241	224	289	377	337	266.301	289.463	348.327
Sr	371	193	232	268	139	247	229	98		121	242	148	73.9	78	106	112	108	122	94.3	324	212.9	241.8	389.1	237.1	175.9	107	86.7	101	95.8	187	178	215	300	283	283	300	227	225	179	220	330	318	140	347	83.8	84.1	116.402	346.593	251.397
Zr	116	133	92	200	153	51	204	184		171	103	105	190	190	208	153	156	156	193	151	187.1	255.9	179.8	256.8	220.3	62.5	80.3	51	47.5	309	393	383	154	143	93.6	184	178	228	225	270	545	534	182	492	131	78.8	198.568	492.241	291.208
Nb	2.92	2.57	1.38	4.31	3.05	1.51	4.48	3.91		1.94	1.92	1.94	3.7	3.65	4.02	2.63	2.68	2.69	3.68	2.78	21.93	17.12	12.76	19.5	18.67	5.54	16.6	4	2.44	24.7	16.9	12.9	10.5	11.8	9.96	9.99	15.4	12.1	15.7	19.8	24.7	27.7	11.3	18.4	21	19	21.5337	18.3926	22.0543
Cs	5.96	1.25	1.37	1.54	0.1	3.45	1.86	0.49		0.19	0.13	0.14	0.35	0.59	0.2	0.49	0.25	0.22	0.16	0.64	10.01	5.39	5.15	8.42	18.89	1.64	1.73	2.83	0.79	8.63	4.21	8.72	3.97	3.1	5.38	6.04	14.2	11	14	16.8	7.07	7.02	16.3	10	16.2	8.18	22.7196	10.0025	10.7104
Ba	158	42	69	242	56	154	134	105		30	46.3	51.1	198	199	172	180	142	118	82.8	70.7	322	745	828	708	754	33.7	43.1	57.7	23.5	1571	1061	1457	452	470	460	465	266	1591	282	340	1913	1907	135	1833	352	221	500.915	1832.62	881.093
Ta	0.27	0.3	0.1	0.3	0.21	0.14	0.3	0.27		0.12	0.15	0.15	0.28	0.27	0.31	0.21	0.22	0.22	0.29	0.23	1.56	1.52	1.36	2.03	2.29	1.27	2.13	0.36	0.18	3.31	0.78	0.78	1.07	1.3	1.17	1.23	1.69	1.25	1.7	2.19	1.83	2.52	0.81	1.55	2.79	3.31	2.98376	1.54647	2.01618
Pb											1.69	1.6	9.08	1.78	2.39	1.17	0.84	0.89	3.94	1.81	27.3	31.12	42.3	50.2	53.62	8.08	28.8	11.8	5.09	29	22.5	20.6	68	27.8	42.5	30.1	30.7	50	25.1	29.8	30.4	29	27.1	38.6	64.9	62.5	62.4964	38.6113	47.4537
Th	6.66	5.51	3.34	3.39	2.86	3.38	3.41	3.12		2.05	1.63	1.63	3.22	3.2	3.7	3.33	3.5	3.01	3.24	4.07	36.02	25.64	29.41	48.22	26.29	0.74	1.48	0.54	0.16	16.5	46.1	33.1	8.51	9.36	3.18	2.8	41.3	13.2	35.1	47.4	37.6	30.9	18.9	45.6	38.2	38.5	35.9781	45.5676	52.3531
U	1.49	1.13	0.71	1.02	0.95	2.98	1.08	0.93		0.74	0.58	0.6	0.97	1.01	1.13	1.01	1.09	0.94	1.03	0.49	2.7	2.68	2.59	4.15	4.95	2.01	3.36	1.4	0.09	4.56	5.71	3.64	1.24	6.99	1.76	2.54	3.25	1.83	2.77	3.92	3.34	3.17	8.78	2.71	3.47	3.93	7.43427	2.70575	4.48857
Hf	3.62	3.28	2.84	5.61	4.35	1.58	5.79	5.21		4.96	3.07	3.08	5.29	5.29	5.86	4.23	4.41	4.35	5.37	4.33	5.33	5.51	3.68	6.33	5	2.02	2.66	1.56	1.54	9.29	11.1	10.7	3.98	4.04	2.55	4.62	4.9	6.25	6.28	7.77	15.5	14.8	5.11	14	4.12	3.02	5.71212	13.9745	8.34721
	References:
	Li, M., Zeng, Y.C., Xu, J.F., Huang, F., Chen, Q., 2020b. Petrogenesis of Early Jurassic (ca. 181ma) dacitic–rhyolitic volcanic rocks in the Amdo ophiolite mélange, central Tibetan Plateau: low‐pressure partial melts of Bangong-Nujiang tethys oceanic crust?. Geological Journal 55(5).
	Li, X.B., Wang, B.D., Liu, H., Wang, L.Q., Chen, L., Yan, G.C., Zhou, F., 2017b. Petrogenesis of Early Jurassic volcanic rocks in the Amdo area，Tibet: Evidences for the subduction of the Bangong-Nujiang Tethys ocean. Acta Petrologica Sinica 33(7), 2073-2084 (in Chinese with English abstract).
	Liu, D.L., Shi, R.D., Ding, L., Huang, Q.S., Zhang, X.R., Yue, Y.H., Zhang, L.Y., 2017. Zircon U–Pb age and Hf isotopic compositions of Mesozoic granitoids in southern Qiangtang, Tibet: implications for the subduction of the Bangong–Nujiang Tethyan ocean. Gondwana Research 41, 157-172.
	Zhu, D.C., Zhao, Z.D., Niu, Y.L., Mo, X.X., Chung, S.L., Hou, Z.Q., Wang, L.Q., Wu, F.Y., 2011. The Lhasa terrane: record of a microcontinent and its histories of drift and growth. Earth and Planetary Science Letters 301, 241-255.
	Yan, H.Y., Long, X., Wang, X.C., Li, J., Wang, Q., Yuan, C., Sun, M., 2016. Middle Jurassic MORB-type gabbro, high-Mg diorite, calc-alkaline diorite and granodiorite in the Ando area, central Tibet: Evidence for a slab roll-back of the Bangong-Nujiang Ocean. Lithos 264, 315-328.
	Liu, M., Zhu, D.C., Zhao, Z.D., Mo, X.X., Guan, Q., Zhang, L.L., Yu, F., Liu, M.H., 2010. Magma mixing of late Early Jurassic age from Nyainrong, northern Tibet and its tectonic significance. Acta Petrologica Sinica 26(10), 3117-3130 (in Chinese with English abstract).
	Zeng, Y.C., Chen, J.L., Xu, J.F., Wang, B.D., Huang, F., 2016a. Sediment melting during subduction initiation: Geochronological and geochemical evidence from the Darutso high–Mg andesites within ophiolite melange, central Tibet. Geochemistry, Geophysics, Geosystems 17, 4859–4877.
	Li, S.M., Wang, Q., Zhu, D.C., Cawood, P.A., Stern, R.J., Weinberg, R., Zhao, Z.D., Mo, X.X., 2020a. Reconciling orogenic drivers for the evolution of the Bangong-Nujiang Tethys during Middle-Late Jurassic. Tectonics 39, e2019TC005951.
	Li, H.F., Liu, Z.B., Chen, W., Wang, N., Wang, J.X., Zhang, K.J., Li, F.Q., Wang, C., 2019c. The discovery of high-Mg rhyolitic rocks in Peng Tso area, Tibet and its significance for evolution of Bangong-Nujiang Ocean. Acta Petrologica Sinica 35(3), 799-815 (in Chinese with English abstract).
	Li, X.B., Wang, B.D., Liu, H., Wang, L.Q., Chen, L., 2015a. The Late Jurassic high-Mg andesites in the Daru Tso area, Tibet: Evidence for the subduction of the Bangong Co-Nujiang River oceanic lithosphere. Geological Bulletin of China 34(2/3), 251-261 (in Chinese with English abstract).
	Tang, Y., Zhai, Q.G., Hu, P.Y., Xiao, X.C., Wang, H.T., Wang, W., Zhu, Z.C., Wu, H., 2019. Jurassic high-Mg andesitic rocks in the middle part of the Bangong-Nujiang suture zone, Tibet: New constraints for the tectonic evolution of the Meso-Tethys Ocean. Acta Petrologica Sinica 35(10), 3097-3114 (in Chinese with English abstract).
	Tang, Y., Zhai, Q.G., Hu, P.Y., Chung, S.L., Xiao, X.C., Wang, H.T., Zhu, Z.C., Wang, W., Wu, H., Lee, H.Y., 2020b. Southward subduction of the Bangong‑Nujiang Tethys Ocean: insights from ca. 161–129 Ma arc volcanic rocks in the north of Lhasa terrane, Tibet. International Journal of Earth Sciences. https://doi.org/10.1007/s00531-020-01823-x.
	Wu, H., Qiangba, Z.X., Li, C., Wang, Q., Gesang, W.D., Ciren, O.Z., Basang, D.Z., 2018. Geochronology and geochemistry of early cretaceous granitic rocks in the dongqiao area, central Tibet: implications for magmatic origin and geological evolution. The Journal of Geology 126(2), 249-260.
	Hu, P.Y., Zhai, Q.G., Jahn, B.M., Wang, J., Li, C., Chung, S.L., Lee, H.Y., Tang, S.H., 2017. Late Early Cretaceous magmatic rocks (118–113Ma) in the middle segment of the Bangong–Nujiang suture zone, Tibetan Plateau: Evidence of lithospheric delamination. Gondwana Research 44, 116–138.
	Zhu, D.C., Mo, X.X., Niu, Y., Zhao, Z.D., Wang, L.Q., Liu, Y.S., Wu, F.Y., 2009. Geochemical investigation of Early Cretaceous igneous rocks along an east-west traverse throughout the central Lhasa terrane, Tibet. Chemical Geology 268, 298-312.
	Tang, Y., Zhai, Q.G., Liu, T., Wang, J., Hu, P.Y., Qiangba, Z.X., Suolang, C.L., 2015. LA-ICP-MS zircon U-Pb dating, geochemical features and geological significance of the Daru Co granite porphyry in Baingoin County, Tibet. Geological Bulletin of China 34(10), 1802-1811 (in Chinese with English abstract).
	Huang, Y., Zhu, D.C., Zhao, Z.D., Zhang, L.L., DePaolo, D., Hu, Z.C., Yuan, H.L., Mo, X.X., 2012. Petrogenesis and implication of the andesites at ~113Ma in the Nagqu region in the northern Lhasa subterrane. Acta Petrologica Sinica 28(5), 1603-1614 (in Chinese with English abstract).
	Wu, H., Zhai, Q.G., Hu, P.Y., Tang, Y., Zhu, Z.C., Wang, W., Xie, C.M., Qiangba, Z.X., 2019. Early Cretaceous volcanic rocks in northern Baingoin, Tibet: Magmatic record of the closure of the Bangong Co-Nujiang Ocean. Geology in China. http://kns.cnki.net/kcms/detail/11.1167.P.20191225.1557.002.html (in Chinese with English abstract).
	Chen, S.S., Shi, R.D., Gong, X.H., Liu, D.L., Huang, Q.S., Yi, G.D., Wu, K., Zou, H.B., 2017a. A syn-collisional model for Early Cretaceous magmatism in the northern and central Lhasa subterranes. Gondwana Research 41, 93–109.
	Chen, Y., Zhu, D.C., Zhao, Z.D., Meng, F.Y., Wang, Q., Santosh, M., Wang, L.Q., Dong, G.C., Mo, X.X., 2014. Slab breakoff triggered ca. 113 Ma magmatism around Xainza area of the Lhasa Terrane, Tibet. Gondwana Research 26, 449-463.
	Hu, W.L., Wang, Q., Yang, J.H., Zhang, C.F., Tang, G.J., Ma, L., Qi, Y., Yang, Z.Y., Sun, P., 2019. Late early Cretaceous peraluminous biotite granites along the Bangong–Nujiang suture zone, Central Tibet: Products derived by partial melting of metasedimentary rocks? Lithos 344-345, 147-158.
	Qu, X.M., Wang, R.J., Xin, H.B., Jiang, J.H., Chen, H. 2012. Age and petrogenesis of A-type granites in the middle segment of the Bangonghu–Nujiang suture, Tibetan plateau. Lithos 146-147, 264–275.
	Sun, S.J., Sun, W.D., Zhang, L.P., Zhang, R.Q., Li, C.Y., Zhang, H., 2015b. Zircon U-Pb ages and geochemical characteristics of granitoids in Nagqu area, Tibet. Lithos 231, 92-102.
	Wang, Y., Ma, X.D., Qu, X.M., Chen, B., 2019. Geochronology and petrogenesis of the xiongmei Cu-bearing granodiorite porphyry in north Lhasa subterrane, central Tibet: implication for the evolution of Bangong-Nujiang metallogenic belt. Ore Geology Reviews 114, 103119-103119.
	Wang, N., Liu, Z.B., Song, Y., Zheng, W.H., Li, F.Q., Teng, L., 2020b. Geochronology and petrogenesis of highly fractionated Early Cretaceous granite in Baingoin area, Tibet. Acta Petrologica Sinica 36(2), 409-425 (in Chinese with English abstract).
	Gao, S.B., Zheng, Y.Y., Wang, J.S., Zhang, Z., Yang, C., 2011. The geochronology and geochemistry of intrusive rocks in Bange area: Constraints on the evolution time of the Bangong Lake-Nujiang ocean basin. Acta Petrologica Sinica 27(7), 1973-1982 (in Chinese with English abstract).
	Chen, Y., Zhu, D.C., Zhao, Z.D., Zhang, L.L., Liu, M., Yu, F., Guan, Q., Mo, X.X., 2010. Geochronology, geochemistry and petrogenesis of the Bamco andesites from the northern Gangdese, Tibet. ActaPetrologicaSinica 26(7), 2193-2206 (in Chinese with English abstract).
	Wang, W., Zhai, Q.G., Hu, P.Y., Chung, S.L., Tang, Y., Wang, H.T., Zhu, Z.C., Wu, H., Huang, Z.Q., 2021. Simultaneous growth and reworking of the Lhasa basement: A case study from Early Cretaceous magmatism in the north-central Tibet. Lithos 380-381, 105863.
	Yi, J.K., Wang, Q., Zhu, D.C., Li, S.M., Liu, S.A., Wang, R., Zhang, L.L., Zhao, Z.D., 2018. Westward-younging high-Mg adakitic magmatism in central Tibet: record of a westward-migrating lithospheric foundering beneath the Lhasa-Qiangtang collision zone during the Late Cretaceous. Lithos 316-317, 92-103.
	Chen, S.S., Fan, W.M., Shi, R.D., Gong, X.H., Wu, K., 2017b. Removal of deep lithosphere in ancient continental collisional orogens: A case study from central Tibet, China. Geochemistry Geophysics Geosystem 18, 1225–1243.
	Li, Y.L., He, J., Han, Z.P., Wang, C.S., Ma, P.F., Zhou, A., Liu, S. A., Xu, M., 2016b. Late Jurassic sodium-rich adakitic intrusive rocks in the southern Qiangtang terrane, central Tibet, and their implications for the Bangong–Nujiang Ocean subduction. Lithos 245, 34-46.
	Li, Y., He, J., Wang, C., Santosh, M., Dai, J., Zhang, Y., Wei, Y., Wang, J., 2013. Late Cretaceous K-rich magmatism in central Tbet: evidence for early elevation of the Tibetan Plateau?. Lithos 160–161, 1-13.
	Li, Y.L., He, J., Wang, C.S., Han, Z.P., Ma, P.F., Xu, M., Du, K.Y., 2015b. Cretaceous volcanic rocks in south Qiangtang Terrane: products of northward subduction of the Bangong–Nujiang ocean?. Journal of Asian Earth Sciences 104, 69-83.
	Sun, M., Tang, J.X., Chen, W., Ma, X.D., Qu, X.M., Song, Y., Li, X.Y., Ding, J.S., 2020. Process of lithospheric delamination beneath the Lhasa–Qiangtang collision orogen: constraints from the geochronology and geochemistry of Late Cretaceous volcanic rocks in the Lhasa terrane, central Tibet. Lithos 356–357, 105219.
	Zhang, L.L., Zhu, D.C., Zhao, Z.D., Liao, Z.L., Wang, L.Q., Mo, X.X. 2011. Early Cretaceous granitoids in Xainza, Tibet: Evidence of slab break-off. Acta Petrologica Sinica 27(7), 1938-1948 (in Chinese with English abstract).
[truncated: 525 more columns]
