# Supplementary material
Source: publisher figshare collection journal article supplement (https://gsapubs.figshare.com/articles/dataset/_/21676790)
Supplement: Supplementary file 1 [file 1]

Wang, W., Zhai, Q., Hu, P., Tang, Y., Wang, H., and Zhu, Z., 2023, Magmatic records of subduction and closure of the Meso-Tethys Ocean in the northern-central Tibetan Plateau: GSA Bulletin, <https://doi.org/10.1130/B36593.1>.

## Supplemental Material

**Supplemental Material 1.** (A) Summary of sample locations, lithologies, and zircon U-Pb ages of the magmatic rocks in the south-north transect along the BNSZ, Tibet. (B) Zircon cathodoluminescence images and concordia plots of the studied samples. (C) Plots of SiO<sub>2</sub> versus MgO (a; McCarron and Smellie, 1998), Sr/Y versus Y (b; Defant and Drummond, 1990), P<sub>2</sub>O<sub>5</sub> versus SiO<sub>2</sub> (c), and Th versus Rb (d; Chappell, 1999) for the studied magmatic rocks in the Baingoin and Amdo areas, Tibet. Chondrite-normalized REE and primitive-mantle-normalized trace element patterns for the studied magmatic rocks in the Baingoin and Amdo areas, Tibet. Some of rocks with irregular trace element distribution are not plotted in the following Fig. 9.

**Supplemental Material 2.** (A) Methods of zircon U-Pb dating. (B) Methods of zircon Lu-Hf isotopic analyses. (C) Methods of whole-rock geochemical analyses.

**Table S1.** U-Pb isotopic data of zircons from the studied samples across the Bangong-Nujiang suture zone.

**Table S2.** Zircon Hf isotopic data of the studied samples across the Bangong-Nujiang suture zone.

**Table S3.** (A) A brief checklist of the geochemical samples; (B) Whole-rock major (wt%) and trace (ppm) element data of the Cretaceous rocks sampled across the Bangong-Nujiang suture zone.

**Table S4.** Summary of zircon U-Pb ages for regional Jurassic-Cretaceous rocks.

**Table S5.** Zircon Lu-Hf isotopic data of the Jurassic magmatic rocks.

**Table S6.** Whole-rock major (wt%) and trace (ppm) element data of the regional Jurassic-Cretaceous rocks.

## Supplemental Material 1

### Part A

#### Summary of sample locations, lithologies, and zircon U-Pb ages of the magmatic rocks in the south-north transect along the BNSZ, Tibet

| Sample | Location | GPS                  | Lithology                | Age $\pm 2\sigma$ (Ma) | Petrographic observation                                                           |
|--------|----------|----------------------|--------------------------|------------------------|------------------------------------------------------------------------------------|
| 18T074 | Tarenben | N32.1815°, E89.6554° | Andesite                 | 110 $\pm$ 1            | Porphyritic texture; phenocrysts of plagioclase and K-feldspar                     |
| 19T921 | Tarenben | N32.1790°, E89.6548° | Rhyolite                 | 116 $\pm$ 2            | Porphyritic texture; phenocrysts of quartz                                         |
| 18T309 | Maqian   | N31.8088°, E90.1298° | Granite                  | 114 $\pm$ 1            | Granitic texture; Quartz, plagioclase, and orthoclase                              |
| 18T297 | Maqian   | N31.7895°, E90.1473° | Andesite                 | 113 $\pm$ 1            | Porphyritic texture; phenocrysts of plagioclase                                    |
| 17T418 | Maqian   | N31.6678°, E90.0061° | Granodiorite<br>porphyry | 116 $\pm$ 1            | Hypidiomorphic granular texture; Quartz, plagioclase, orthoclase,<br>and amphibole |
| 17T286 | Daru Tso | N31.5891°, E90.8110° | Diorite                  | 113 $\pm$ 1            | Euhedral granular textures; plagioclase, amphibole, and pyroxene                   |
| 17T008 | Beila    | N31.4106°, E91.0744° | Andesite                 | 113 $\pm$ 1*           | Porphyritic texture; phenocrysts of plagioclase                                    |
| 18T062 | Baingoin | N31.4307°, E89.8032° | Granite                  | 112 $\pm$ 1            | Granitic texture; Quartz, plagioclase, and biotite                                 |
| 18T323 | Baingoin | N31.2357°, E89.7764° | Granite                  | 79 $\pm$ 1             | Granitic texture; Quartz, plagioclase, orthoclase, and biotite                     |
| 18T318 | Baingoin | N31.2292°, E89.7809° | Granite                  | 80 $\pm$ 1             | Granitic texture; Quartz, plagioclase, orthoclase, and biotite                     |
| 18T039 | Yongzhu  | N31.1895°, E89.3258° | Granodiorite             | 77 $\pm$ 1             | Hypidiomorphic granular texture; Quartz, plagioclase, and biotite                  |
| 18T045 | Yongzhu  | N31.1895°, E89.3258° | Diorite enclave          | 76 $\pm$ 1             | Hypidiomorphic granular texture; Plagioclase, amphibole, and<br>biotite            |
| 18T048 | Yongzhu  | N31.3236°, E89.2591° | Granodiorite             | 78 $\pm$ 1             | Hypidiomorphic granular texture; Quartz, plagioclase, and biotite                  |

The age result marked by \* is from [Zhu et al., \(2019\)](#).

## Part B

### Zircon cathodoluminescence images and concordia plots of the studied samples

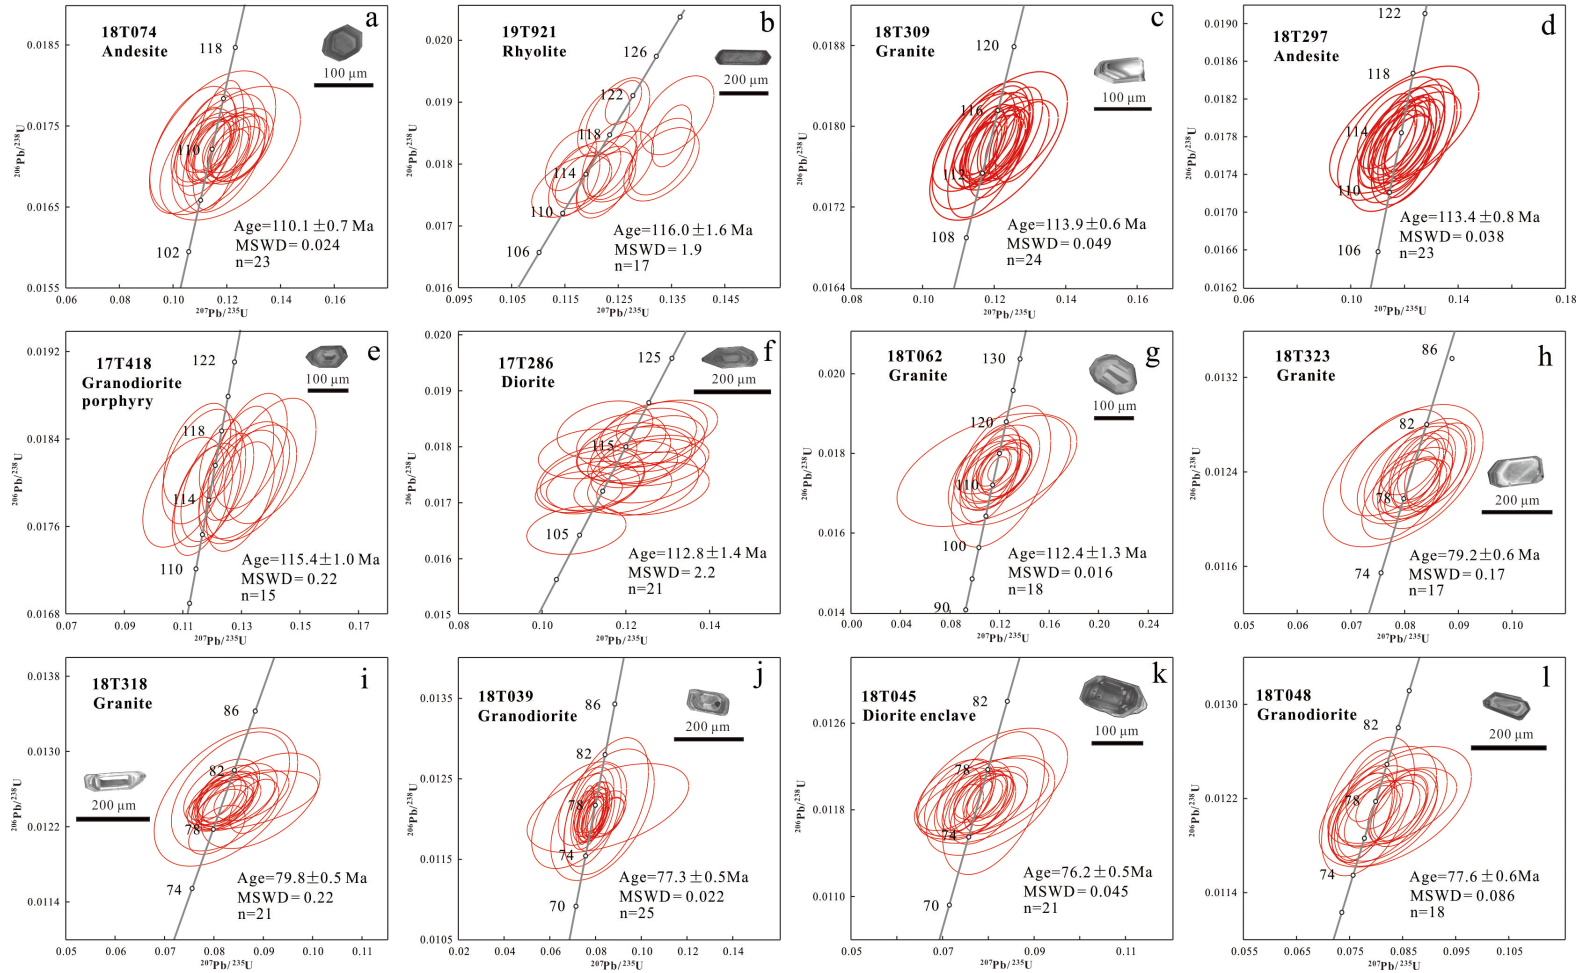

## Part C

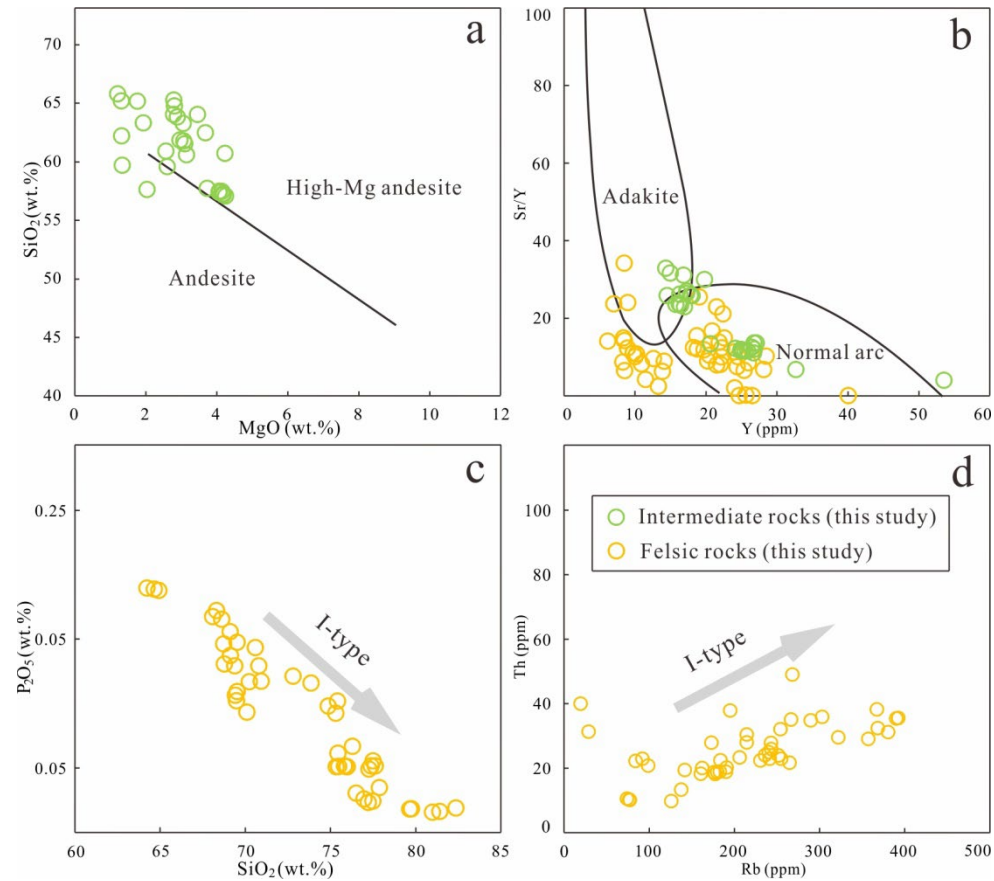

Plots of SiO<sub>2</sub> versus MgO (a; [McCarron and Smellie, 1998](#)), Sr/Y versus Y (b; [Defant and Drummond, 1990](#)), P<sub>2</sub>O<sub>5</sub> versus SiO<sub>2</sub> (c;), and Th versus Rb (d; [Chappell, 1999](#)) for the studied magmatic rocks in the Baingoin and Amdo areas, Tibet.

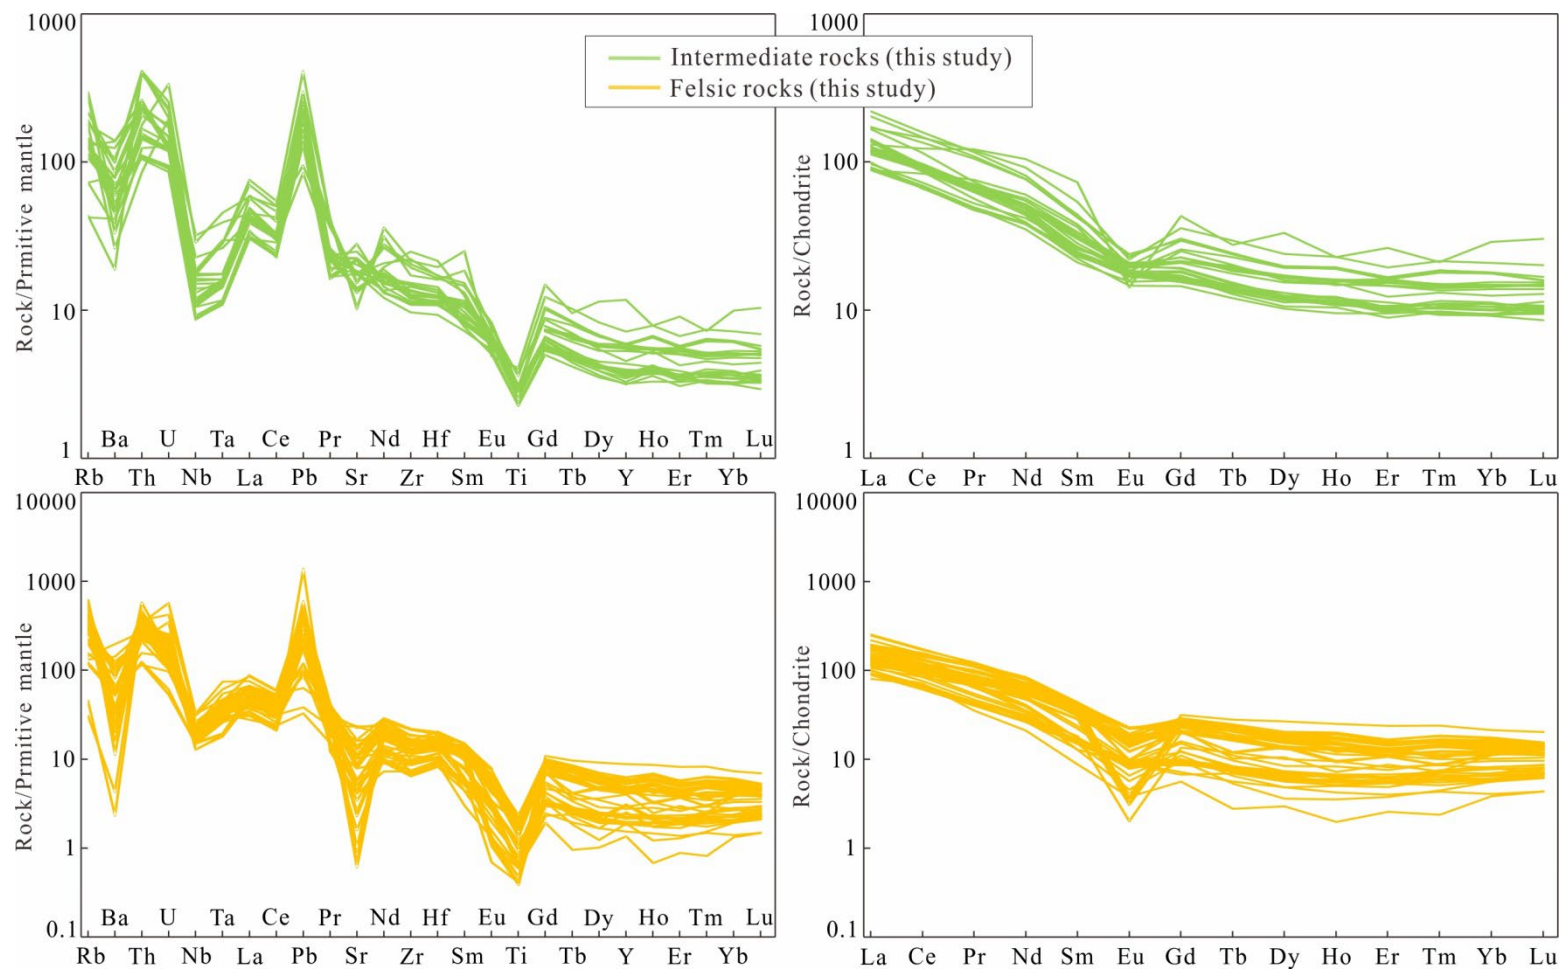

Chondrite-normalized REE and primitive-mantle-normalized trace element patterns for the studied magmatic rocks in the Baingoin and Amdo areas, Tibet. Some of rocks with irregular trace element distribution are not plotted in the following Fig. 9.

## **Reference:**

- Zhu, Z.C., Zhai, Q.G., Hu, P.Y., Chung, S.L., Tang, Y., Wang, H.T., Wu, H., Wang, W., Huang, Z.Q., Lee, H.Y., 2019. Closure of the Bangong–Nujiang Tethyan Ocean in the central Tibet: Results from the provenance of the Duoni Formation. *Journal of Sedimentary Research* 89, 1039–1054.
- McCarron, J.J., Smellie, J.L., 1998. Tectonic implications of fore-arc magmatism and generation of high-magnesian andesites: alexander Island, Antarctica. *Journal of Geological Society* 155 (2), 269-280.
- Defant, M., Drummond, M.S., 1990. Derivation of some modern arc magmas by melting of young subducted lithosphere. *Nature* 347, 662–665.
- Chappell, B. W., 1999. Aluminum saturation in I- and S-type granites and the characterization of fractionated hapogranites. *Lithos*, 46, 531–551.

## Supplemental Material 2

### Part A (Methods of zircon U-Pb dating)

Zircon was separated at the Special Laboratory of the Geological Team of Hebei Province, Langfang, China. Cathodoluminescence (CL) images were undertaken using a HITACH S-3000 N scanning electron microscope connected with a Gatan Chroma CL imaging system at the Institute of Geology, Chinese Academy of Geological Sciences, Beijing, China. Zircon LA-ICP-MS (Laser ablation-inductively coupled plasma-mass spectrometry) U-Pb analysis was performed at the Beijing Createch Test Technology Co. Ltd, Beijing, China. The analysis used an ESI NWR 193 nm laser ablation system, coupled to an AnalytikJena PQMS Elite ICP-MS instrument receiving ion-signal intensities. The laser-ablation system has a beam diameter of 25  $\mu\text{m}$ , a repetition rate of 8 Hz, and a beam energy density of 6.25 J/cm<sup>2</sup>. Detailed analytical processes are given in Hou et al. (2009). *ICPMSDataCal* was used to conduct off-line raw data correction and quantitative calibration. Weighted-mean ages and concordia diagrams were calculated and plotted by Isoplot/Ex (version 3.0; Ludwig, 2003).

### Part B (Methods of zircon Lu-Hf isotopic analyses)

Zircon Hf isotopic analyses were performed on the same location or within the same domain as U-Pb analyses. Zircon on 17 T series of samples were analyzed using Neptune Multi-Collector Inductively Coupled Plasma Mass Spectrometry (MC-ICP-MS), connected by a Geolas-193 laser ablation system at the Institute of Geology and Geophysics, Chinese Academy of Sciences, China. A beam of 45  $\mu\text{m}$

diameters, 8 Hz laser repetition rate, and laser energy of 10 J/cm<sup>2</sup> were involved in analyses. Zircon standard Mud Tank was used to check the stability of the equipments. Detailed analytical procedures were provided in Wu et al. (2006). The analyses on 18 T and 19 T series of samples were performed at the Beijing Createch Test Technology Co. Ltd., China. A Neptune Plus multi-collector-ICP-MS (MC-ICP-MS), coupled to a NWR 213 nm laser ablation system, was used in analyses. The analytical beam diameter was 45 µm, with repetition rate of 10 Hz and laser energy of 10-11 J/cm<sup>2</sup>. Zircon standard GJ-1 was used for external calibration. Details of the instrumental conditions and procedures are after Hou et al. (2007).

### **Part C (Methods of whole-rock geochemical analyses)**

Whole-rock major and trace element analyses on 18 T and 19 T series of samples were detected at the Beijing Createch Test Technology Co. Ltd., China. Major element compositions were measured by X-ray fluorescence (SHIMADZU XRF-1800), and analytical accuracy is better than 1%. Trace element compositions were analyzed by inductively coupled plasma mass spectrometry (ICP-MS; Agilent 7500). Analytical uncertainties were better than 6% for most elements. Detailed operating procedures are described in Wang et al. (2021).

#### **References:**

Hou, K.J., Li, Y.H., Tian, Y.Y., 2009. In situ U-Pb zircon dating using laser ablation-multiion coupling-ICP-MS. *Mineral Deposits* 28, 481–492 (in Chinese with English abstract).

Hou, K.J., Li, Y.H., Zou, T.R., Qu, X.M., Shi, Y.R., Xie, G.Q., 2007. LA-MC-ICP-MS



technique for Hf isotope microanalysis of zircon and its geological applications.

*Acta Petrologica Sinica* 23(10), 2595–2604 (in Chinese with English abstract).

Ludwig, K.R., 2003. Users Manual for Isoplot 3.00: A Geochronological Toolkit for Microsoft Excel, Special Publication No. 4. Berkeley Geochronology Centre.

Wu, F.Y., Yang, Y.H., Xie, L.W., Yang, J.H., Xu, P., 2006. Hf isotopic compositions of the standard zircons and baddeleyites used in U-Pb geochronology. *Chemical Geology* 234, 105–126.

Wang, W., Zhai, Q.G., Hu, P.Y., Chung, S.L., Tang, Y., Wang, H.T., Zhu, Z.C., Wu, H., Huang, Z.Q., 2021. Simultaneous growth and reworking of the Lhasa basement: A case study from Early Cretaceous magmatism in the north-central Tibet. *Lithos* 380-381, 105863.

## Supplemental Table S1

### U-Pb isotopic data of zircons from the studied samples across the Bangong-Nujiang suture zone

| Spots  | Th    | U     | Th   | Common-Pb-corrected isotopic ratios ( $\pm 1\sigma$ ) |           |                                    |           |                                    |           | Common-Pb-corrected isotopic ages (Ma) |           |                                  |           |                                  |           | err  |  |
|--------|-------|-------|------|-------------------------------------------------------|-----------|------------------------------------|-----------|------------------------------------|-----------|----------------------------------------|-----------|----------------------------------|-----------|----------------------------------|-----------|------|--|
|        | (ppm) | (ppm) | /U   | $^{207}\text{Pb}^*/^{206}\text{Pb}^*$                 | $1\sigma$ | $^{207}\text{Pb}^*/^{235}\text{U}$ | $1\sigma$ | $^{206}\text{Pb}^*/^{238}\text{U}$ | $1\sigma$ | $^{207}\text{Pb}/^{206}\text{Pb}$      | $1\sigma$ | $^{207}\text{Pb}/^{235}\text{U}$ | $1\sigma$ | $^{206}\text{Pb}/^{238}\text{U}$ | $1\sigma$ | corr |  |
| 18T074 |       |       |      |                                                       |           |                                    |           |                                    |           |                                        |           |                                  |           |                                  |           |      |  |
| 01     | 175   | 183   | 0.96 | 0.052922                                              | 0.003065  | 0.124817                           | 0.007203  | 0.017218                           | 0.000268  | 324.1                                  | 131.5     | 119.4                            | 6.5       | 110.0                            | 1.7       | 91%  |  |
| 02     | 353   | 451   | 0.78 | 0.047074                                              | 0.001884  | 0.111989                           | 0.004658  | 0.017260                           | 0.000311  | 53.8                                   | 92.6      | 107.8                            | 4.3       | 110.3                            | 2.0       | 97%  |  |
| 03     | 651   | 455   | 1.43 | 0.048025                                              | 0.002305  | 0.113656                           | 0.005189  | 0.017268                           | 0.000207  | 101.9                                  | 107.4     | 109.3                            | 4.7       | 110.4                            | 1.3       | 99%  |  |
| 04     | 202   | 169   | 1.19 | 0.046960                                              | 0.003190  | 0.110886                           | 0.007686  | 0.017237                           | 0.000316  | 55.7                                   | 155.5     | 106.8                            | 7.0       | 110.2                            | 2.0       | 96%  |  |
| 05     | 303   | 223   | 1.36 | 0.046334                                              | 0.004986  | 0.107214                           | 0.010583  | 0.017204                           | 0.000518  | 16.8                                   | 237.0     | 103.4                            | 9.7       | 110.0                            | 3.3       | 93%  |  |
| 06     | 393   | 300   | 1.31 | 0.048518                                              | 0.004314  | 0.114983                           | 0.010151  | 0.017202                           | 0.000505  | 124.2                                  | 196.3     | 110.5                            | 9.2       | 109.9                            | 3.2       | 99%  |  |
| 07     | 1776  | 893   | 1.99 | 0.051949                                              | 0.002338  | 0.124160                           | 0.006558  | 0.017156                           | 0.000222  | 283.4                                  | 103.7     | 118.8                            | 5.9       | 109.7                            | 1.4       | 91%  |  |
| 08     | 295   | 225   | 1.31 | 0.051895                                              | 0.003358  | 0.124343                           | 0.008558  | 0.017250                           | 0.000309  | 279.7                                  | 154.6     | 119.0                            | 7.7       | 110.3                            | 2.0       | 92%  |  |
| 09     | 416   | 298   | 1.40 | 0.049127                                              | 0.002681  | 0.115644                           | 0.005987  | 0.017246                           | 0.000211  | 153.8                                  | 127.8     | 111.1                            | 5.4       | 110.2                            | 1.3       | 99%  |  |
| 10     | 210   | 182   | 1.16 | 0.048294                                              | 0.003110  | 0.113794                           | 0.007249  | 0.017298                           | 0.000245  | 122.3                                  | 135.2     | 109.4                            | 6.6       | 110.6                            | 1.6       | 98%  |  |
| 11     | 540   | 339   | 1.59 | 0.048151                                              | 0.002271  | 0.113394                           | 0.005182  | 0.017199                           | 0.000243  | 105.6                                  | 107.4     | 109.1                            | 4.7       | 109.9                            | 1.5       | 99%  |  |
| 12     | 517   | 311   | 1.66 | 0.051954                                              | 0.003528  | 0.122588                           | 0.007713  | 0.017287                           | 0.000240  | 283.4                                  | 155.5     | 117.4                            | 7.0       | 110.5                            | 1.5       | 93%  |  |
| 13     | 150   | 178   | 0.84 | 0.051203                                              | 0.003602  | 0.120189                           | 0.008040  | 0.017256                           | 0.000311  | 250.1                                  | 162.9     | 115.2                            | 7.3       | 110.3                            | 2.0       | 95%  |  |
| 14     | 236   | 306   | 0.77 | 0.051310                                              | 0.002481  | 0.120817                           | 0.005348  | 0.017247                           | 0.000254  | 253.8                                  | 111.1     | 115.8                            | 4.8       | 110.2                            | 1.6       | 95%  |  |
| 15     | 177   | 189   | 0.94 | 0.051109                                              | 0.003694  | 0.119577                           | 0.008227  | 0.017235                           | 0.000283  | 255.6                                  | 163.9     | 114.7                            | 7.5       | 110.2                            | 1.8       | 95%  |  |
| 16     | 451   | 321   | 1.41 | 0.048874                                              | 0.007960  | 0.114787                           | 0.015471  | 0.017293                           | 0.000586  | 142.7                                  | 340.7     | 110.3                            | 14.1      | 110.5                            | 3.7       | 99%  |  |
| 17     | 665   | 452   | 1.47 | 0.049139                                              | 0.003202  | 0.116566                           | 0.007708  | 0.017208                           | 0.000273  | 153.8                                  | 148.1     | 112.0                            | 7.0       | 110.0                            | 1.7       | 98%  |  |
| 18     | 495   | 345   | 1.43 | 0.047439                                              | 0.003126  | 0.111191                           | 0.007019  | 0.017208                           | 0.000264  | 77.9                                   | 142.6     | 107.1                            | 6.4       | 110.0                            | 1.7       | 97%  |  |
| 19     | 372   | 266   | 1.40 | 0.047541                                              | 0.003336  | 0.112496                           | 0.007445  | 0.017267                           | 0.000411  | 76.0                                   | 159.2     | 108.2                            | 6.8       | 110.4                            | 2.6       | 98%  |  |
| 20     | 164   | 152   | 1.08 | 0.049783                                              | 0.006579  | 0.121239                           | 0.017260  | 0.017164                           | 0.000545  | 183.4                                  | 281.4     | 116.2                            | 15.6      | 109.7                            | 3.5       | 94%  |  |

| Spots         | Th<br>(ppm) | U<br>(ppm) | Th<br>/U | Common-Pb-corrected isotopic ratios ( $\pm 1\sigma$ ) |           |                                    |           |                                    |           | Common-Pb-corrected isotopic ages (Ma) |           |                                  |           |                                  |           | err<br>corr |
|---------------|-------------|------------|----------|-------------------------------------------------------|-----------|------------------------------------|-----------|------------------------------------|-----------|----------------------------------------|-----------|----------------------------------|-----------|----------------------------------|-----------|-------------|
|               |             |            |          | $^{207}\text{Pb}^*/^{206}\text{Pb}^*$                 | $1\sigma$ | $^{207}\text{Pb}^*/^{235}\text{U}$ | $1\sigma$ | $^{206}\text{Pb}^*/^{238}\text{U}$ | $1\sigma$ | $^{207}\text{Pb}/^{206}\text{Pb}$      | $1\sigma$ | $^{207}\text{Pb}/^{235}\text{U}$ | $1\sigma$ | $^{206}\text{Pb}/^{238}\text{U}$ | $1\sigma$ |             |
| 21            | 738         | 487        | 1.51     | 0.049367                                              | 0.002934  | 0.116837                           | 0.006268  | 0.017261                           | 0.000528  | 164.9                                  | 138.9     | 112.2                            | 5.7       | 110.3                            | 3.3       | 98%         |
| 22            | 304         | 226        | 1.35     | 0.050400                                              | 0.004136  | 0.119247                           | 0.010303  | 0.017165                           | 0.000482  | 213.0                                  | 190.7     | 114.4                            | 9.3       | 109.7                            | 3.1       | 95%         |
| 23            | 577         | 453        | 1.27     | 0.051132                                              | 0.002169  | 0.120563                           | 0.005168  | 0.017159                           | 0.000201  | 255.6                                  | 98.1      | 115.6                            | 4.7       | 109.7                            | 1.3       | 94%         |
| <b>19T921</b> |             |            |          |                                                       |           |                                    |           |                                    |           |                                        |           |                                  |           |                                  |           |             |
| 1             | 516         | 1489       | 0.35     | 0.048112                                              | 0.000983  | 0.124898                           | 0.003979  | 0.018771                           | 0.000411  | 105.6                                  | 48.1      | 119.5                            | 3.6       | 119.9                            | 2.6       | 99%         |
| 2             | 574         | 1730       | 0.33     | 0.047537                                              | 0.000929  | 0.122279                           | 0.003230  | 0.018670                           | 0.000365  | 76.0                                   | 46.3      | 117.1                            | 2.9       | 119.2                            | 2.3       | 98%         |
| 3             | 367         | 1212       | 0.30     | 0.052477                                              | 0.001299  | 0.136099                           | 0.004539  | 0.018788                           | 0.000421  | 305.6                                  | 52.8      | 129.6                            | 4.1       | 120.0                            | 2.7       | 92%         |
| 4             | 362         | 604        | 0.60     | 0.047744                                              | 0.001752  | 0.116302                           | 0.004964  | 0.017640                           | 0.000329  | 87.1                                   | 85.2      | 111.7                            | 4.5       | 112.7                            | 2.1       | 99%         |
| 5             | 241         | 921        | 0.26     | 0.048060                                              | 0.001262  | 0.116751                           | 0.003185  | 0.017724                           | 0.000376  | 101.9                                  | 63.0      | 112.1                            | 2.9       | 113.3                            | 2.4       | 98%         |
| 6             | 813         | 2080       | 0.39     | 0.053826                                              | 0.001486  | 0.135021                           | 0.002490  | 0.018456                           | 0.000330  | 364.9                                  | 65.7      | 128.6                            | 2.2       | 117.9                            | 2.1       | 91%         |
| 7             | 934         | 884        | 1.06     | 0.053268                                              | 0.001194  | 0.133179                           | 0.004075  | 0.018121                           | 0.000409  | 338.9                                  | 51.8      | 127.0                            | 3.7       | 115.8                            | 2.6       | 90%         |
| 8             | 316         | 1025       | 0.31     | 0.050364                                              | 0.001301  | 0.122784                           | 0.003651  | 0.017703                           | 0.000329  | 213.0                                  | 91.7      | 117.6                            | 3.3       | 113.1                            | 2.1       | 96%         |
| 9             | 390         | 504        | 0.78     | 0.048247                                              | 0.001486  | 0.119086                           | 0.004245  | 0.017865                           | 0.000335  | 122.3                                  | 74.1      | 114.2                            | 3.9       | 114.2                            | 2.1       | 99%         |
| 10            | 1702        | 3193       | 0.53     | 0.048056                                              | 0.000731  | 0.125989                           | 0.002258  | 0.018993                           | 0.000236  | 101.9                                  | 67.6      | 120.5                            | 2.0       | 121.3                            | 1.5       | 99%         |
| 11            | 534         | 1711       | 0.31     | 0.049546                                              | 0.001034  | 0.123303                           | 0.003369  | 0.018080                           | 0.000400  | 172.3                                  | 48.1      | 118.1                            | 3.0       | 115.5                            | 2.5       | 97%         |
| 12            | 206         | 605        | 0.34     | 0.050904                                              | 0.001668  | 0.125103                           | 0.004325  | 0.017961                           | 0.000378  | 235.3                                  | 71.3      | 119.7                            | 3.9       | 114.8                            | 2.4       | 95%         |
| 13            | 306         | 1120       | 0.27     | 0.046854                                              | 0.001252  | 0.116106                           | 0.003162  | 0.018060                           | 0.000321  | 42.7                                   | 63.0      | 111.5                            | 2.9       | 115.4                            | 2.0       | 96%         |
| 14            | 504         | 1736       | 0.29     | 0.050121                                              | 0.000965  | 0.123887                           | 0.003095  | 0.017944                           | 0.000342  | 211.2                                  | 50.9      | 118.6                            | 2.8       | 114.6                            | 2.2       | 96%         |
| 15            | 398         | 890        | 0.45     | 0.048539                                              | 0.001363  | 0.118317                           | 0.003378  | 0.017739                           | 0.000300  | 124.2                                  | 66.7      | 113.5                            | 3.1       | 113.3                            | 1.9       | 99%         |
| 16            | 600         | 1833       | 0.33     | 0.053327                                              | 0.001224  | 0.133133                           | 0.004669  | 0.017996                           | 0.000391  | 342.7                                  | 47.2      | 126.9                            | 4.2       | 115.0                            | 2.5       | 90%         |
| 17            | 479         | 1446       | 0.33     | 0.050207                                              | 0.001117  | 0.122426                           | 0.003508  | 0.017708                           | 0.000383  | 211.2                                  | 50.0      | 117.3                            | 3.2       | 113.2                            | 2.4       | 96%         |
| <b>18T309</b> |             |            |          |                                                       |           |                                    |           |                                    |           |                                        |           |                                  |           |                                  |           |             |
| 1             | 432         | 479        | 0.90     | 0.048085                                              | 0.002575  | 0.117516                           | 0.005799  | 0.017864                           | 0.000232  | 101.9                                  | 131.5     | 112.8                            | 5.3       | 114.1                            | 1.5       | 98%         |
| 2             | 296         | 309        | 0.96     | 0.050866                                              | 0.002491  | 0.124419                           | 0.006010  | 0.017924                           | 0.000307  | 235.3                                  | 112.9     | 119.1                            | 5.4       | 114.5                            | 1.9       | 96%         |

| Spots         | Th<br>(ppm) | U<br>(ppm) | Th<br>/U | Common-Pb-corrected isotopic ratios ( $\pm 1\sigma$ ) |           |                                    |           |                                    |           | Common-Pb-corrected isotopic ages (Ma) |           |                                  |           |                                  |           | err<br>corr |
|---------------|-------------|------------|----------|-------------------------------------------------------|-----------|------------------------------------|-----------|------------------------------------|-----------|----------------------------------------|-----------|----------------------------------|-----------|----------------------------------|-----------|-------------|
|               |             |            |          | $^{207}\text{Pb}^*/^{206}\text{Pb}^*$                 | $1\sigma$ | $^{207}\text{Pb}^*/^{235}\text{U}$ | $1\sigma$ | $^{206}\text{Pb}^*/^{238}\text{U}$ | $1\sigma$ | $^{207}\text{Pb}/^{206}\text{Pb}$      | $1\sigma$ | $^{207}\text{Pb}/^{235}\text{U}$ | $1\sigma$ | $^{206}\text{Pb}/^{238}\text{U}$ | $1\sigma$ |             |
| 3             | 663         | 602        | 1.10     | 0.048585                                              | 0.004315  | 0.121234                           | 0.012706  | 0.017805                           | 0.000486  | 127.9                                  | 196.3     | 116.2                            | 11.5      | 113.8                            | 3.1       | 97%         |
| 4             | 454         | 422        | 1.07     | 0.054325                                              | 0.003327  | 0.133965                           | 0.007829  | 0.018021                           | 0.000354  | 383.4                                  | 138.9     | 127.7                            | 7.0       | 115.1                            | 2.2       | 89%         |
| 5             | 313         | 398        | 0.79     | 0.047722                                              | 0.003957  | 0.116811                           | 0.009329  | 0.017811                           | 0.000417  | 87.1                                   | 185.2     | 112.2                            | 8.5       | 113.8                            | 2.6       | 98%         |
| 6             | 570         | 655        | 0.87     | 0.047882                                              | 0.001776  | 0.117063                           | 0.003977  | 0.017835                           | 0.000237  | 100.1                                  | -105.5    | 112.4                            | 3.6       | 114.0                            | 1.5       | 98%         |
| 7             | 1357        | 1037       | 1.31     | 0.048762                                              | 0.001902  | 0.120208                           | 0.004967  | 0.017830                           | 0.000250  | 200.1                                  | 95.4      | 115.3                            | 4.5       | 113.9                            | 1.6       | 98%         |
| 8             | 204         | 307        | 0.66     | 0.047189                                              | 0.003559  | 0.115638                           | 0.008510  | 0.017841                           | 0.000321  | 57.5                                   | 170.3     | 111.1                            | 7.7       | 114.0                            | 2.0       | 97%         |
| 9             | 638         | 832        | 0.77     | 0.047884                                              | 0.001578  | 0.117557                           | 0.003967  | 0.017809                           | 0.000227  | 100.1                                  | 77.8      | 112.9                            | 3.6       | 113.8                            | 1.4       | 99%         |
| 10            | 365         | 410        | 0.89     | 0.049054                                              | 0.002645  | 0.120271                           | 0.006371  | 0.017810                           | 0.000253  | 150.1                                  | 125.9     | 115.3                            | 5.8       | 113.8                            | 1.6       | 98%         |
| 11            | 1996        | 1324       | 1.51     | 0.050165                                              | 0.001227  | 0.122904                           | 0.002878  | 0.017836                           | 0.000234  | 211.2                                  | 55.5      | 117.7                            | 2.6       | 114.0                            | 1.5       | 96%         |
| 12            | 244         | 347        | 0.70     | 0.048751                                              | 0.002378  | 0.119531                           | 0.006078  | 0.017780                           | 0.000219  | 200.1                                  | 119.4     | 114.6                            | 5.5       | 113.6                            | 1.4       | 99%         |
| 13            | 803         | 1026       | 0.78     | 0.049266                                              | 0.001287  | 0.121497                           | 0.003517  | 0.017846                           | 0.000205  | 161.2                                  | 61.1      | 116.4                            | 3.2       | 114.0                            | 1.3       | 97%         |
| 14            | 685         | 587        | 1.17     | 0.051831                                              | 0.001830  | 0.127874                           | 0.004946  | 0.017846                           | 0.000263  | 279.7                                  | 86.1      | 122.2                            | 4.5       | 114.0                            | 1.7       | 93%         |
| 15            | 1010        | 1322       | 0.76     | 0.047664                                              | 0.001297  | 0.117031                           | 0.003385  | 0.017788                           | 0.000172  | 83.4                                   | 64.8      | 112.4                            | 3.1       | 113.7                            | 1.1       | 98%         |
| 16            | 316         | 645        | 0.49     | 0.047562                                              | 0.002853  | 0.116026                           | 0.006508  | 0.017863                           | 0.000317  | 76.0                                   | 137.0     | 111.5                            | 5.9       | 114.1                            | 2.0       | 97%         |
| 17            | 939         | 1287       | 0.73     | 0.050595                                              | 0.001250  | 0.124806                           | 0.003357  | 0.017885                           | 0.000186  | 233.4                                  | 57.4      | 119.4                            | 3.0       | 114.3                            | 1.2       | 95%         |
| 18            | 303         | 385        | 0.79     | 0.048516                                              | 0.002977  | 0.119195                           | 0.007200  | 0.017866                           | 0.000310  | 124.2                                  | 137.0     | 114.3                            | 6.5       | 114.2                            | 2.0       | 99%         |
| 19            | 741         | 999        | 0.74     | 0.049954                                              | 0.001305  | 0.122494                           | 0.003315  | 0.017824                           | 0.000193  | 194.5                                  | 61.1      | 117.3                            | 3.0       | 113.9                            | 1.2       | 97%         |
| 20            | 463         | 926        | 0.50     | 0.047919                                              | 0.002443  | 0.118406                           | 0.007515  | 0.017748                           | 0.000431  | 94.5                                   | 118.5     | 113.6                            | 6.8       | 113.4                            | 2.7       | 99%         |
| 21            | 751         | 992        | 0.76     | 0.047676                                              | 0.001322  | 0.116047                           | 0.003217  | 0.017708                           | 0.000221  | 83.4                                   | 64.8      | 111.5                            | 2.9       | 113.2                            | 1.4       | 98%         |
| 22            | 585         | 590        | 0.99     | 0.049495                                              | 0.002025  | 0.121184                           | 0.005369  | 0.017731                           | 0.000290  | 172.3                                  | 96.3      | 116.1                            | 4.9       | 113.3                            | 1.8       | 97%         |
| 23            | 240         | 278        | 0.86     | 0.050009                                              | 0.003765  | 0.123261                           | 0.009670  | 0.017816                           | 0.000296  | 194.5                                  | 175.9     | 118.0                            | 8.7       | 113.8                            | 1.9       | 96%         |
| 24            | 393         | 395        | 0.99     | 0.049661                                              | 0.002594  | 0.121509                           | 0.006228  | 0.017855                           | 0.000288  | 189.0                                  | 122.2     | 116.4                            | 5.6       | 114.1                            | 1.8       | 97%         |
| <b>18T297</b> |             |            |          |                                                       |           |                                    |           |                                    |           |                                        |           |                                  |           |                                  |           |             |
| 1             | 611         | 415        | 1.47     | 0.049425                                              | 0.002229  | 0.120873                           | 0.005619  | 0.017830                           | 0.000265  | 168.6                                  | 137.9     | 115.9                            | 5.1       | 113.9                            | 1.7       | 98%         |

| Spots         | Th<br>(ppm) | U<br>(ppm) | Th<br>/U | Common-Pb-corrected isotopic ratios ( $\pm 1\sigma$ ) |           |                                    |           |                                    |           | Common-Pb-corrected isotopic ages (Ma) |           |                                  |           |                                  |           | err<br>corr |
|---------------|-------------|------------|----------|-------------------------------------------------------|-----------|------------------------------------|-----------|------------------------------------|-----------|----------------------------------------|-----------|----------------------------------|-----------|----------------------------------|-----------|-------------|
|               |             |            |          | $^{207}\text{Pb}^*/^{206}\text{Pb}^*$                 | $1\sigma$ | $^{207}\text{Pb}^*/^{235}\text{U}$ | $1\sigma$ | $^{206}\text{Pb}^*/^{238}\text{U}$ | $1\sigma$ | $^{207}\text{Pb}/^{206}\text{Pb}$      | $1\sigma$ | $^{207}\text{Pb}/^{235}\text{U}$ | $1\sigma$ | $^{206}\text{Pb}/^{238}\text{U}$ | $1\sigma$ |             |
| 2             | 828         | 498        | 1.66     | 0.049860                                              | 0.002394  | 0.122010                           | 0.006513  | 0.017700                           | 0.000361  | 187.1                                  | 112.9     | 116.9                            | 5.9       | 113.1                            | 2.3       | 96%         |
| 3             | 189         | 166        | 1.14     | 0.050447                                              | 0.006103  | 0.119560                           | 0.013241  | 0.017679                           | 0.000443  | 216.7                                  | 255.5     | 114.7                            | 12.0      | 113.0                            | 2.8       | 98%         |
| 4             | 383         | 231        | 1.66     | 0.048047                                              | 0.002840  | 0.117092                           | 0.007072  | 0.017710                           | 0.000245  | 101.9                                  | 133.3     | 112.4                            | 6.4       | 113.2                            | 1.5       | 99%         |
| 5             | 675         | 419        | 1.61     | 0.047516                                              | 0.002189  | 0.115914                           | 0.005351  | 0.017718                           | 0.000212  | 76.0                                   | 113.0     | 111.4                            | 4.9       | 113.2                            | 1.3       | 98%         |
| 6             | 203         | 200        | 1.02     | 0.046240                                              | 0.002693  | 0.113973                           | 0.007059  | 0.017720                           | 0.000304  | 9.4                                    | 137.0     | 109.6                            | 6.4       | 113.2                            | 1.9       | 96%         |
| 7             | 586         | 371        | 1.58     | 0.047557                                              | 0.003409  | 0.116464                           | 0.008346  | 0.017779                           | 0.000276  | 76.0                                   | 162.9     | 111.9                            | 7.6       | 113.6                            | 1.7       | 98%         |
| 8             | 454         | 280        | 1.62     | 0.086286                                              | 0.004689  | 0.208349                           | 0.009958  | 0.017724                           | 0.000296  | 1346.3                                 | 109.7     | 192.2                            | 8.4       | 113.3                            | 1.9       | 48%         |
| 9             | 254         | 203        | 1.25     | 0.050322                                              | 0.004026  | 0.123208                           | 0.010260  | 0.017744                           | 0.000441  | 209.3                                  | 187.0     | 118.0                            | 9.3       | 113.4                            | 2.8       | 96%         |
| 10            | 249         | 200        | 1.24     | 0.048449                                              | 0.007527  | 0.119919                           | 0.018358  | 0.017875                           | 0.000445  | 120.5                                  | 329.6     | 115.0                            | 16.6      | 114.2                            | 2.8       | 99%         |
| 11            | 293         | 233        | 1.25     | 0.048452                                              | 0.003116  | 0.118065                           | 0.007609  | 0.017814                           | 0.000334  | 120.5                                  | 144.4     | 113.3                            | 6.9       | 113.8                            | 2.1       | 99%         |
| 12            | 272         | 186        | 1.46     | 0.050366                                              | 0.004714  | 0.122909                           | 0.012008  | 0.017791                           | 0.000320  | 213.0                                  | 203.7     | 117.7                            | 10.9      | 113.7                            | 2.0       | 96%         |
| 13            | 334         | 266        | 1.26     | 0.049459                                              | 0.003246  | 0.120780                           | 0.008260  | 0.017686                           | 0.000325  | 168.6                                  | 153.7     | 115.8                            | 7.5       | 113.0                            | 2.1       | 97%         |
| 14            | 149         | 150        | 0.99     | 0.046446                                              | 0.003017  | 0.113268                           | 0.007153  | 0.017859                           | 0.000263  | 20.5                                   | 148.1     | 109.0                            | 6.5       | 114.1                            | 1.7       | 95%         |
| 15            | 393         | 259        | 1.52     | 0.048291                                              | 0.002599  | 0.117980                           | 0.006396  | 0.017796                           | 0.000222  | 122.3                                  | 112.9     | 113.2                            | 5.8       | 113.7                            | 1.4       | 99%         |
| 16            | 218         | 185        | 1.18     | 0.047739                                              | 0.003716  | 0.116345                           | 0.009106  | 0.017690                           | 0.000290  | 87.1                                   | 174.0     | 111.8                            | 8.3       | 113.0                            | 1.8       | 98%         |
| 17            | 212         | 180        | 1.18     | 0.048646                                              | 0.004424  | 0.118961                           | 0.010675  | 0.017716                           | 0.000407  | 131.6                                  | 200.0     | 114.1                            | 9.7       | 113.2                            | 2.6       | 99%         |
| 18            | 243         | 201        | 1.21     | 0.047442                                              | 0.005402  | 0.114971                           | 0.013109  | 0.017780                           | 0.000432  | 77.9                                   | 242.6     | 110.5                            | 11.9      | 113.6                            | 2.7       | 97%         |
| 19            | 300         | 242        | 1.24     | 0.051192                                              | 0.003119  | 0.123847                           | 0.007397  | 0.017778                           | 0.000277  | 250.1                                  | 140.7     | 118.6                            | 6.7       | 113.6                            | 1.8       | 95%         |
| 20            | 219         | 186        | 1.17     | 0.063201                                              | 0.007899  | 0.161433                           | 0.025395  | 0.017770                           | 0.000359  | 716.7                                  | 263.9     | 152.0                            | 22.2      | 113.5                            | 2.3       | 71%         |
| 21            | 346         | 251        | 1.38     | 0.048699                                              | 0.003196  | 0.118874                           | 0.007903  | 0.017663                           | 0.000237  | 131.6                                  | 148.1     | 114.1                            | 7.2       | 112.9                            | 1.5       | 98%         |
| 22            | 504         | 295        | 1.71     | 0.049396                                              | 0.002371  | 0.120751                           | 0.006079  | 0.017707                           | 0.000220  | 164.9                                  | 112.9     | 115.8                            | 5.5       | 113.2                            | 1.4       | 97%         |
| 23            | 301         | 226        | 1.33     | 0.049978                                              | 0.002973  | 0.121037                           | 0.007231  | 0.017720                           | 0.000328  | 194.5                                  | 136.1     | 116.0                            | 6.5       | 113.2                            | 2.1       | 97%         |
| <b>17T418</b> |             |            |          |                                                       |           |                                    |           |                                    |           |                                        |           |                                  |           |                                  |           |             |
| 1             | 150         | 195        | 0.77     | 0.049088                                              | 0.003031  | 0.120418                           | 0.007308  | 0.017978                           | 0.000340  | 153.8                                  | -50.0     | 115.5                            | 6.6       | 114.9                            | 2.2       | 99%         |

| Spots         | Th<br>(ppm) | U<br>(ppm) | Th<br>/U | Common-Pb-corrected isotopic ratios ( $\pm 1\sigma$ ) |           |                                    |           |                                    |           | Common-Pb-corrected isotopic ages (Ma) |           |                                  |           |                                  |           | err<br>corr |
|---------------|-------------|------------|----------|-------------------------------------------------------|-----------|------------------------------------|-----------|------------------------------------|-----------|----------------------------------------|-----------|----------------------------------|-----------|----------------------------------|-----------|-------------|
|               |             |            |          | $^{207}\text{Pb}^*/^{206}\text{Pb}^*$                 | $1\sigma$ | $^{207}\text{Pb}^*/^{235}\text{U}$ | $1\sigma$ | $^{206}\text{Pb}^*/^{238}\text{U}$ | $1\sigma$ | $^{207}\text{Pb}/^{206}\text{Pb}$      | $1\sigma$ | $^{207}\text{Pb}/^{235}\text{U}$ | $1\sigma$ | $^{206}\text{Pb}/^{238}\text{U}$ | $1\sigma$ |             |
| 2             | 138         | 217        | 0.64     | 0.052462                                              | 0.003006  | 0.129680                           | 0.007646  | 0.017874                           | 0.000330  | 305.6                                  | 131.5     | 123.8                            | 6.9       | 114.2                            | 2.1       | 91%         |
| 3             | 400         | 569        | 0.70     | 0.050936                                              | 0.002492  | 0.125469                           | 0.005791  | 0.018055                           | 0.000263  | 239.0                                  | 112.9     | 120.0                            | 5.2       | 115.3                            | 1.7       | 96%         |
| 4             | 132         | 195        | 0.68     | 0.054096                                              | 0.003981  | 0.133362                           | 0.010242  | 0.018001                           | 0.000349  | 376.0                                  | 160.2     | 127.1                            | 9.2       | 115.0                            | 2.2       | 90%         |
| 5             | 177         | 205        | 0.87     | 0.045282                                              | 0.003792  | 0.110159                           | 0.009135  | 0.017914                           | 0.000332  |                                        |           | 106.1                            | 8.4       | 114.5                            | 2.1       | 92%         |
| 6             | 121         | 176        | 0.69     | 0.053732                                              | 0.004084  | 0.130944                           | 0.010234  | 0.018024                           | 0.000353  | 361.2                                  | 167.6     | 124.9                            | 9.2       | 115.2                            | 2.2       | 91%         |
| 7             | 143         | 186        | 0.77     | 0.052709                                              | 0.003269  | 0.129757                           | 0.007432  | 0.018176                           | 0.000346  | 316.7                                  | 140.7     | 123.9                            | 6.7       | 116.1                            | 2.2       | 93%         |
| 8             | 112         | 233        | 0.48     | 0.047438                                              | 0.002887  | 0.118391                           | 0.007525  | 0.017888                           | 0.000312  | 77.9                                   | 131.5     | 113.6                            | 6.8       | 114.3                            | 2.0       | 99%         |
| 9             | 182         | 236        | 0.77     | 0.045179                                              | 0.002821  | 0.114867                           | 0.007603  | 0.018255                           | 0.000312  |                                        |           | 110.4                            | 6.9       | 116.6                            | 2.0       | 94%         |
| 10            | 198         | 560        | 0.35     | 0.049036                                              | 0.002053  | 0.122955                           | 0.004839  | 0.018218                           | 0.000238  | 150.1                                  | 100.0     | 117.7                            | 4.4       | 116.4                            | 1.5       | 98%         |
| 11            | 196         | 231        | 0.85     | 0.052759                                              | 0.003252  | 0.133069                           | 0.008319  | 0.018291                           | 0.000348  | 316.7                                  | 140.7     | 126.9                            | 7.5       | 116.8                            | 2.2       | 91%         |
| 12            | 116         | 182        | 0.64     | 0.056075                                              | 0.004236  | 0.139780                           | 0.010377  | 0.018201                           | 0.000378  | 453.8                                  | 167.4     | 132.8                            | 9.2       | 116.3                            | 2.4       | 86%         |
| 13            | 175         | 179        | 0.98     | 0.052408                                              | 0.003703  | 0.129897                           | 0.009523  | 0.017962                           | 0.000343  | 301.9                                  | 128.7     | 124.0                            | 8.6       | 114.8                            | 2.2       | 92%         |
| 14            | 230         | 306        | 0.75     | 0.047557                                              | 0.002698  | 0.116681                           | 0.006819  | 0.017836                           | 0.000330  | 76.0                                   | 129.6     | 112.1                            | 6.2       | 114.0                            | 2.1       | 98%         |
| 15            | 203         | 256        | 0.79     | 0.046599                                              | 0.003458  | 0.115582                           | 0.008370  | 0.018148                           | 0.000346  | 27.9                                   | 170.4     | 111.1                            | 7.6       | 115.9                            | 2.2       | 95%         |
| <b>17T286</b> |             |            |          |                                                       |           |                                    |           |                                    |           |                                        |           |                                  |           |                                  |           |             |
| 1             | 86          | 138        | 0.62     | 0.047774                                              | 0.003678  | 0.108204                           | 0.007828  | 0.016508                           | 0.000284  | 87.1                                   | 174.0     | 104.3                            | 7.2       | 105.5                            | 1.8       | 98%         |
| 2             | 83          | 129        | 0.64     | 0.046692                                              | 0.004005  | 0.111547                           | 0.008455  | 0.017409                           | 0.000401  | 35.3                                   | 192.6     | 107.4                            | 7.7       | 111.3                            | 2.5       | 96%         |
| 3             | 104         | 205        | 0.51     | 0.050293                                              | 0.004108  | 0.121998                           | 0.009115  | 0.017856                           | 0.000330  | 209.3                                  | 190.7     | 116.9                            | 8.2       | 114.1                            | 2.1       | 97%         |
| 4             | 288         | 316        | 0.91     | 0.044917                                              | 0.002693  | 0.108759                           | 0.006881  | 0.017193                           | 0.000244  | error                                  |           | 104.8                            | 6.3       | 109.9                            | 1.5       | 95%         |
| 5             | 138         | 249        | 0.55     | 0.047729                                              | 0.003365  | 0.112143                           | 0.007342  | 0.017294                           | 0.000295  | 87.1                                   | 168.5     | 107.9                            | 6.7       | 110.5                            | 1.9       | 97%         |
| 6             | 120         | 220        | 0.55     | 0.050459                                              | 0.003403  | 0.126611                           | 0.008482  | 0.018225                           | 0.000382  | 216.7                                  | 155.5     | 121.0                            | 7.6       | 116.4                            | 2.4       | 96%         |
| 7             | 129         | 223        | 0.58     | 0.052946                                              | 0.004033  | 0.125358                           | 0.009054  | 0.017571                           | 0.000379  | 327.8                                  | 178.7     | 119.9                            | 8.2       | 112.3                            | 2.4       | 93%         |
| 8             | 108         | 202        | 0.54     | 0.048628                                              | 0.003214  | 0.119560                           | 0.007375  | 0.017913                           | 0.000343  | 131.6                                  | 148.1     | 114.7                            | 6.7       | 114.5                            | 2.2       | 99%         |
| 9             | 131         | 206        | 0.64     | 0.045075                                              | 0.003282  | 0.110888                           | 0.007778  | 0.017872                           | 0.000292  | error                                  |           | 106.8                            | 7.1       | 114.2                            | 1.9       | 93%         |

| Spots         | Th<br>(ppm) | U<br>(ppm) | Th<br>/U | Common-Pb-corrected isotopic ratios ( $\pm 1\sigma$ ) |           |                                    |           |                                    |           | Common-Pb-corrected isotopic ages (Ma) |           |                                  |           |                                  |           | err<br>corr |
|---------------|-------------|------------|----------|-------------------------------------------------------|-----------|------------------------------------|-----------|------------------------------------|-----------|----------------------------------------|-----------|----------------------------------|-----------|----------------------------------|-----------|-------------|
|               |             |            |          | $^{207}\text{Pb}^*/^{206}\text{Pb}^*$                 | $1\sigma$ | $^{207}\text{Pb}^*/^{235}\text{U}$ | $1\sigma$ | $^{206}\text{Pb}^*/^{238}\text{U}$ | $1\sigma$ | $^{207}\text{Pb}/^{206}\text{Pb}$      | $1\sigma$ | $^{207}\text{Pb}/^{235}\text{U}$ | $1\sigma$ | $^{206}\text{Pb}/^{238}\text{U}$ | $1\sigma$ |             |
| 10            | 86          | 138        | 0.62     | 0.047774                                              | 0.003678  | 0.108204                           | 0.007828  | 0.016508                           | 0.000284  | 87.1                                   | 174.0     | 104.3                            | 7.2       | 105.5                            | 1.8       | 98%         |
| 11            | 176         | 289        | 0.61     | 0.051984                                              | 0.003052  | 0.127877                           | 0.007206  | 0.018056                           | 0.000330  | 283.4                                  | 133.3     | 122.2                            | 6.5       | 115.4                            | 2.1       | 94%         |
| 12            | 356         | 403        | 0.88     | 0.049609                                              | 0.002839  | 0.121641                           | 0.007093  | 0.017687                           | 0.000277  | 176.0                                  | 133.3     | 116.6                            | 6.4       | 113.0                            | 1.8       | 96%         |
| 13            | 144         | 262        | 0.55     | 0.051571                                              | 0.003221  | 0.129827                           | 0.007983  | 0.018363                           | 0.000310  | 264.9                                  | 175.0     | 123.9                            | 7.2       | 117.3                            | 2.0       | 94%         |
| 14            | 162         | 194        | 0.83     | 0.050762                                              | 0.003411  | 0.124084                           | 0.008292  | 0.017863                           | 0.000346  | 231.6                                  | 155.5     | 118.8                            | 7.5       | 114.1                            | 2.2       | 96%         |
| 15            | 105         | 159        | 0.66     | 0.052369                                              | 0.003741  | 0.124120                           | 0.008743  | 0.017342                           | 0.000373  | 301.9                                  | 162.9     | 118.8                            | 7.9       | 110.8                            | 2.4       | 93%         |
| 16            | 159         | 258        | 0.61     | 0.050495                                              | 0.003325  | 0.119281                           | 0.007728  | 0.017269                           | 0.000302  | 216.7                                  | 153.7     | 114.4                            | 7.0       | 110.4                            | 1.9       | 96%         |
| 17            | 166         | 221        | 0.75     | 0.047160                                              | 0.003415  | 0.112050                           | 0.008235  | 0.017405                           | 0.000357  | 57.5                                   | 162.9     | 107.8                            | 7.5       | 111.2                            | 2.3       | 96%         |
| 18            | 147         | 237        | 0.62     | 0.046421                                              | 0.003135  | 0.115021                           | 0.007542  | 0.018303                           | 0.000340  | 20.5                                   | 155.5     | 110.5                            | 6.9       | 116.9                            | 2.2       | 94%         |
| 19            | 148         | 183        | 0.81     | 0.049688                                              | 0.003102  | 0.124851                           | 0.007937  | 0.018159                           | 0.000350  | 189.0                                  | 146.3     | 119.5                            | 7.2       | 116.0                            | 2.2       | 97%         |
| 20            | 180         | 261        | 0.69     | 0.051851                                              | 0.003684  | 0.126709                           | 0.008683  | 0.017754                           | 0.000298  | 279.7                                  | 164.8     | 121.1                            | 7.8       | 113.4                            | 1.9       | 93%         |
| 21            | 237         | 267        | 0.89     | 0.047314                                              | 0.002788  | 0.118915                           | 0.007032  | 0.018110                           | 0.000316  | 64.9                                   | 133.3     | 114.1                            | 6.4       | 115.7                            | 2.0       | 98%         |
| <b>18T062</b> |             |            |          |                                                       |           |                                    |           |                                    |           |                                        |           |                                  |           |                                  |           |             |
| 1             | 81          | 156        | 0.52     | 0.049689                                              | 0.006342  | 0.117264                           | 0.013101  | 0.017612                           | 0.000675  | 189.0                                  | 264.8     | 112.6                            | 11.9      | 112.5                            | 4.3       | 99%         |
| 2             | 71          | 121        | 0.59     | 0.049550                                              | 0.009116  | 0.117821                           | 0.022930  | 0.017651                           | 0.000701  | 172.3                                  | 381.4     | 113.1                            | 20.8      | 112.8                            | 4.4       | 99%         |
| 3             | 114         | 230        | 0.50     | 0.052112                                              | 0.005763  | 0.125966                           | 0.013432  | 0.017626                           | 0.000472  | 300.1                                  | 253.7     | 120.5                            | 12.1      | 112.6                            | 3.0       | 93%         |
| 4             | 274         | 521        | 0.53     | 0.047529                                              | 0.003244  | 0.115660                           | 0.008273  | 0.017638                           | 0.000359  | 76.0                                   | 155.5     | 111.1                            | 7.5       | 112.7                            | 2.3       | 98%         |
| 5             | 93          | 310        | 0.30     | 0.047709                                              | 0.004032  | 0.115489                           | 0.009368  | 0.017639                           | 0.000304  | 83.4                                   | 188.9     | 111.0                            | 8.5       | 112.7                            | 1.9       | 98%         |
| 6             | 69          | 139        | 0.49     | 0.050523                                              | 0.008447  | 0.118553                           | 0.018404  | 0.017564                           | 0.000515  | 220.4                                  | 344.4     | 113.8                            | 16.7      | 112.2                            | 3.3       | 98%         |
| 7             | 256         | 480        | 0.53     | 0.049192                                              | 0.002263  | 0.118704                           | 0.005364  | 0.017608                           | 0.000204  | 166.8                                  | 102.8     | 113.9                            | 4.9       | 112.5                            | 1.3       | 98%         |
| 8             | 96          | 142        | 0.68     | 0.051652                                              | 0.007124  | 0.122051                           | 0.015876  | 0.017535                           | 0.000482  | 333.4                                  | 233.3     | 116.9                            | 14.4      | 112.1                            | 3.1       | 95%         |
| 9             | 77          | 150        | 0.51     | 0.054410                                              | 0.013933  | 0.128126                           | 0.032689  | 0.017577                           | 0.000908  | 387.1                                  | 492.5     | 122.4                            | 29.4      | 112.3                            | 5.7       | 91%         |
| 10            | 136         | 356        | 0.38     | 0.047937                                              | 0.006288  | 0.113590                           | 0.014157  | 0.017543                           | 0.000602  | 94.5                                   | 294.4     | 109.2                            | 12.9      | 112.1                            | 3.8       | 97%         |
| 11            | 73          | 130        | 0.56     | 0.045876                                              | 0.007306  | 0.111369                           | 0.017893  | 0.017649                           | 0.000440  |                                        |           | 107.2                            | 16.3      | 112.8                            | 2.8       | 94%         |

| Spots         | Th<br>(ppm) | U<br>(ppm) | Th<br>/U | Common-Pb-corrected isotopic ratios ( $\pm 1\sigma$ ) |           |                                    |           |                                    |           | Common-Pb-corrected isotopic ages (Ma) |           |                                  |           |                                  |           | err<br>corr |
|---------------|-------------|------------|----------|-------------------------------------------------------|-----------|------------------------------------|-----------|------------------------------------|-----------|----------------------------------------|-----------|----------------------------------|-----------|----------------------------------|-----------|-------------|
|               |             |            |          | $^{207}\text{Pb}^*/^{206}\text{Pb}^*$                 | $1\sigma$ | $^{207}\text{Pb}^*/^{235}\text{U}$ | $1\sigma$ | $^{206}\text{Pb}^*/^{238}\text{U}$ | $1\sigma$ | $^{207}\text{Pb}/^{206}\text{Pb}$      | $1\sigma$ | $^{207}\text{Pb}/^{235}\text{U}$ | $1\sigma$ | $^{206}\text{Pb}/^{238}\text{U}$ | $1\sigma$ |             |
| 12            | 115         | 354        | 0.32     | 0.049273                                              | 0.004778  | 0.118506                           | 0.011069  | 0.017571                           | 0.000397  | 161.2                                  | 211.1     | 113.7                            | 10.0      | 112.3                            | 2.5       | 98%         |
| 13            | 74          | 118        | 0.63     | 0.048041                                              | 0.007485  | 0.112773                           | 0.016263  | 0.017496                           | 0.000811  | 101.9                                  | 333.3     | 108.5                            | 14.8      | 111.8                            | 5.1       | 96%         |
| 14            | 70          | 142        | 0.50     | 0.051136                                              | 0.012643  | 0.121341                           | 0.026532  | 0.017424                           | 0.001174  | 255.6                                  | 488.8     | 116.3                            | 24.0      | 111.4                            | 7.4       | 95%         |
| 15            | 64          | 114        | 0.56     | 0.049010                                              | 0.007649  | 0.116662                           | 0.018306  | 0.017515                           | 0.000629  | 150.1                                  | 329.6     | 112.0                            | 16.6      | 111.9                            | 4.0       | 99%         |
| 16            | 93          | 134        | 0.69     | 0.050587                                              | 0.004583  | 0.120717                           | 0.010762  | 0.017556                           | 0.000365  | 220.4                                  | 200.0     | 115.7                            | 9.8       | 112.2                            | 2.3       | 96%         |
| 17            | 114         | 188        | 0.61     | 0.047717                                              | 0.022066  | 0.109928                           | 0.047993  | 0.017587                           | 0.000938  | 83.4                                   | 838.5     | 105.9                            | 43.9      | 112.4                            | 5.9       | 94%         |
| 18            | 150         | 217        | 0.69     | 0.048155                                              | 0.007391  | 0.116538                           | 0.018751  | 0.017445                           | 0.000461  | 105.6                                  | 329.6     | 111.9                            | 17.1      | 111.5                            | 2.9       | 99%         |
| <b>18T323</b> |             |            |          |                                                       |           |                                    |           |                                    |           |                                        |           |                                  |           |                                  |           |             |
| 1             | 371         | 337        | 1.10     | 0.047908                                              | 0.003907  | 0.081240                           | 0.006648  | 0.012373                           | 0.000273  | 94.5                                   | 181.5     | 79.3                             | 6.2       | 79.3                             | 1.7       | 99%         |
| 2             | 331         | 359        | 0.92     | 0.048297                                              | 0.002683  | 0.082124                           | 0.004521  | 0.012354                           | 0.000167  | 122.3                                  | 116.6     | 80.1                             | 4.2       | 79.1                             | 1.1       | 98%         |
| 3             | 364         | 847        | 0.43     | 0.048116                                              | 0.002199  | 0.081658                           | 0.004067  | 0.012269                           | 0.000163  | 105.6                                  | 103.7     | 79.7                             | 3.8       | 78.6                             | 1.0       | 98%         |
| 4             | 675         | 1185       | 0.57     | 0.049923                                              | 0.001622  | 0.084683                           | 0.002812  | 0.012374                           | 0.000205  | 190.8                                  | 71.3      | 82.5                             | 2.6       | 79.3                             | 1.3       | 95%         |
| 5             | 1145        | 765        | 1.50     | 0.049772                                              | 0.004063  | 0.083720                           | 0.005771  | 0.012386                           | 0.000308  | 183.4                                  | 181.5     | 81.6                             | 5.4       | 79.4                             | 2.0       | 97%         |
| 6             | 387         | 411        | 0.94     | 0.047127                                              | 0.005536  | 0.079718                           | 0.009825  | 0.012368                           | 0.000398  | 57.5                                   | 264.8     | 77.9                             | 9.2       | 79.2                             | 2.5       | 98%         |
| 7             | 382         | 785        | 0.49     | 0.047154                                              | 0.002247  | 0.080054                           | 0.003970  | 0.012316                           | 0.000176  | 57.5                                   | 111.1     | 78.2                             | 3.7       | 78.9                             | 1.1       | 99%         |
| 8             | 554         | 645        | 0.86     | 0.048839                                              | 0.004199  | 0.082020                           | 0.006319  | 0.012401                           | 0.000273  | 139.0                                  | 192.6     | 80.0                             | 5.9       | 79.4                             | 1.7       | 99%         |
| 9             | 1059        | 1533       | 0.69     | 0.045577                                              | 0.003969  | 0.078135                           | 0.006651  | 0.012478                           | 0.000297  |                                        |           | 76.4                             | 6.3       | 79.9                             | 1.9       | 95%         |
| 10            | 611         | 857        | 0.71     | 0.051117                                              | 0.002988  | 0.086541                           | 0.004327  | 0.012460                           | 0.000234  | 255.6                                  | 135.2     | 84.3                             | 4.0       | 79.8                             | 1.5       | 94%         |
| 11            | 712         | 893        | 0.80     | 0.047289                                              | 0.002020  | 0.081022                           | 0.003594  | 0.012457                           | 0.000165  | 64.9                                   | 96.3      | 79.1                             | 3.4       | 79.8                             | 1.1       | 99%         |
| 12            | 1023        | 971        | 1.05     | 0.048704                                              | 0.001648  | 0.082950                           | 0.002827  | 0.012425                           | 0.000171  | 200.1                                  | 79.6      | 80.9                             | 2.7       | 79.6                             | 1.1       | 98%         |
| 13            | 1028        | 1090       | 0.94     | 0.048882                                              | 0.001790  | 0.082330                           | 0.002916  | 0.012310                           | 0.000144  | 142.7                                  | 89.8      | 80.3                             | 2.7       | 78.9                             | 0.9       | 98%         |
| 14            | 565         | 837        | 0.68     | 0.049138                                              | 0.002600  | 0.082434                           | 0.004075  | 0.012255                           | 0.000166  | 153.8                                  | 119.4     | 80.4                             | 3.8       | 78.5                             | 1.1       | 97%         |
| 15            | 332         | 471        | 0.70     | 0.047826                                              | 0.002772  | 0.079262                           | 0.004779  | 0.012170                           | 0.000224  | 100.1                                  | 133.3     | 77.5                             | 4.5       | 78.0                             | 1.4       | 99%         |
| 16            | 1663        | 1605       | 1.04     | 0.048605                                              | 0.002071  | 0.082335                           | 0.003464  | 0.012431                           | 0.000197  | 127.9                                  | 100.0     | 80.3                             | 3.2       | 79.6                             | 1.3       | 99%         |



| Spots  | Th    | U     | Th   | Common-Pb-corrected isotopic ratios ( $\pm 1\sigma$ ) |           |                                    |           |                                    |           | Common-Pb-corrected isotopic ages (Ma) |           |                                  |           |                                  |           | err  |  |
|--------|-------|-------|------|-------------------------------------------------------|-----------|------------------------------------|-----------|------------------------------------|-----------|----------------------------------------|-----------|----------------------------------|-----------|----------------------------------|-----------|------|--|
|        | (ppm) | (ppm) | /U   | $^{207}\text{Pb}^*/^{206}\text{Pb}^*$                 | $1\sigma$ | $^{207}\text{Pb}^*/^{235}\text{U}$ | $1\sigma$ | $^{206}\text{Pb}^*/^{238}\text{U}$ | $1\sigma$ | $^{207}\text{Pb}/^{206}\text{Pb}$      | $1\sigma$ | $^{207}\text{Pb}/^{235}\text{U}$ | $1\sigma$ | $^{206}\text{Pb}/^{238}\text{U}$ | $1\sigma$ | corr |  |
| 17     | 566   | 978   | 0.58 | 0.049488                                              | 0.002210  | 0.083434                           | 0.003984  | 0.012412                           | 0.000222  | 172.3                                  | 103.7     | 81.4                             | 3.7       | 79.5                             | 1.4       | 97%  |  |
| 18T318 |       |       |      |                                                       |           |                                    |           |                                    |           |                                        |           |                                  |           |                                  |           |      |  |
| 1      | 816   | 941   | 0.87 | 0.046604                                              | 0.001884  | 0.079611                           | 0.003081  | 0.012476                           | 0.000143  | 27.9                                   | 96.3      | 77.8                             | 2.9       | 79.9                             | 0.9       | 97%  |  |
| 2      | 692   | 1315  | 0.53 | 0.047904                                              | 0.001705  | 0.082303                           | 0.003032  | 0.012468                           | 0.000157  | 94.5                                   | 83.3      | 80.3                             | 2.8       | 79.9                             | 1.0       | 99%  |  |
| 3      | 863   | 827   | 1.04 | 0.047307                                              | 0.002063  | 0.081063                           | 0.003537  | 0.012487                           | 0.000175  | 64.9                                   | 100.0     | 79.1                             | 3.3       | 80.0                             | 1.1       | 98%  |  |
| 4      | 938   | 467   | 2.01 | 0.051529                                              | 0.003206  | 0.087631                           | 0.005018  | 0.012535                           | 0.000178  | 264.9                                  | 172.2     | 85.3                             | 4.7       | 80.3                             | 1.1       | 93%  |  |
| 5      | 955   | 939   | 1.02 | 0.048297                                              | 0.002266  | 0.082380                           | 0.003749  | 0.012421                           | 0.000143  | 122.3                                  | 98.1      | 80.4                             | 3.5       | 79.6                             | 0.9       | 99%  |  |
| 6      | 669   | 542   | 1.23 | 0.051907                                              | 0.004041  | 0.089479                           | 0.007947  | 0.012477                           | 0.000335  | 279.7                                  | 175.0     | 87.0                             | 7.4       | 79.9                             | 2.1       | 91%  |  |
| 7      | 1001  | 1299  | 0.77 | 0.051817                                              | 0.001993  | 0.088194                           | 0.003294  | 0.012418                           | 0.000190  | 276.0                                  | 88.9      | 85.8                             | 3.1       | 79.6                             | 1.2       | 92%  |  |
| 8      | 641   | 930   | 0.69 | 0.047826                                              | 0.002009  | 0.081486                           | 0.003389  | 0.012384                           | 0.000142  | 100.1                                  | 87.0      | 79.5                             | 3.2       | 79.3                             | 0.9       | 99%  |  |
| 9      | 422   | 628   | 0.67 | 0.047906                                              | 0.002384  | 0.082490                           | 0.004207  | 0.012529                           | 0.000215  | 94.5                                   | 114.8     | 80.5                             | 3.9       | 80.3                             | 1.4       | 99%  |  |
| 10     | 673   | 833   | 0.81 | 0.049747                                              | 0.003488  | 0.084776                           | 0.005325  | 0.012518                           | 0.000234  | 183.4                                  | 164.8     | 82.6                             | 5.0       | 80.2                             | 1.5       | 97%  |  |
| 11     | 870   | 960   | 0.91 | 0.048088                                              | 0.002636  | 0.081727                           | 0.004129  | 0.012433                           | 0.000176  | 101.9                                  | 125.9     | 79.8                             | 3.9       | 79.7                             | 1.1       | 99%  |  |
| 12     | 408   | 604   | 0.67 | 0.052460                                              | 0.005495  | 0.087746                           | 0.008838  | 0.012486                           | 0.000203  | 305.6                                  | 236.1     | 85.4                             | 8.3       | 80.0                             | 1.3       | 93%  |  |
| 13     | 930   | 710   | 1.31 | 0.049051                                              | 0.003023  | 0.084255                           | 0.005342  | 0.012490                           | 0.000187  | 150.1                                  | 137.0     | 82.1                             | 5.0       | 80.0                             | 1.2       | 97%  |  |
| 14     | 545   | 875   | 0.62 | 0.048463                                              | 0.002505  | 0.082964                           | 0.004013  | 0.012520                           | 0.000179  | 120.5                                  | 118.5     | 80.9                             | 3.8       | 80.2                             | 1.1       | 99%  |  |
| 15     | 1181  | 1385  | 0.85 | 0.046944                                              | 0.002779  | 0.081583                           | 0.005078  | 0.012571                           | 0.000231  | 55.7                                   | 133.3     | 79.6                             | 4.8       | 80.5                             | 1.5       | 98%  |  |
| 16     | 589   | 544   | 1.08 | 0.048114                                              | 0.005820  | 0.082448                           | 0.009600  | 0.012517                           | 0.000485  | 105.6                                  | 262.9     | 80.4                             | 9.0       | 80.2                             | 3.1       | 99%  |  |
| 17     | 754   | 1068  | 0.71 | 0.046913                                              | 0.001653  | 0.081120                           | 0.002921  | 0.012538                           | 0.000161  | 55.7                                   | 72.2      | 79.2                             | 2.7       | 80.3                             | 1.0       | 98%  |  |
| 18     | 370   | 726   | 0.51 | 0.047771                                              | 0.002211  | 0.082356                           | 0.003832  | 0.012515                           | 0.000176  | 87.1                                   | 107.4     | 80.4                             | 3.6       | 80.2                             | 1.1       | 99%  |  |
| 19     | 520   | 572   | 0.91 | 0.048066                                              | 0.002844  | 0.082111                           | 0.004913  | 0.012443                           | 0.000191  | 101.9                                  | 133.3     | 80.1                             | 4.6       | 79.7                             | 1.2       | 99%  |  |
| 20     | 591   | 749   | 0.79 | 0.047823                                              | 0.002166  | 0.080621                           | 0.003776  | 0.012169                           | 0.000172  | 100.1                                  | 94.4      | 78.7                             | 3.5       | 78.0                             | 1.1       | 99%  |  |
| 21     | 937   | 943   | 0.99 | 0.047737                                              | 0.003382  | 0.083368                           | 0.007901  | 0.012576                           | 0.000417  | 87.1                                   | 168.5     | 81.3                             | 7.4       | 80.6                             | 2.7       | 99%  |  |
| 18T039 |       |       |      |                                                       |           |                                    |           |                                    |           |                                        |           |                                  |           |                                  |           |      |  |

| Spots | Th<br>(ppm) | U<br>(ppm) | Th<br>/U | Common-Pb-corrected isotopic ratios ( $\pm 1\sigma$ ) |           |                                    |           |                                    |           | Common-Pb-corrected isotopic ages (Ma) |           |                                  |           |                                  |           | err<br>corr |
|-------|-------------|------------|----------|-------------------------------------------------------|-----------|------------------------------------|-----------|------------------------------------|-----------|----------------------------------------|-----------|----------------------------------|-----------|----------------------------------|-----------|-------------|
|       |             |            |          | $^{207}\text{Pb}^*/^{206}\text{Pb}^*$                 | $1\sigma$ | $^{207}\text{Pb}^*/^{235}\text{U}$ | $1\sigma$ | $^{206}\text{Pb}^*/^{238}\text{U}$ | $1\sigma$ | $^{207}\text{Pb}/^{206}\text{Pb}$      | $1\sigma$ | $^{207}\text{Pb}/^{235}\text{U}$ | $1\sigma$ | $^{206}\text{Pb}/^{238}\text{U}$ | $1\sigma$ |             |
| 1     | 297         | 630        | 0.47     | 0.047312                                              | 0.002301  | 0.078685                           | 0.003790  | 0.012059                           | 0.000148  | 64.9                                   | 111.1     | 76.9                             | 3.6       | 77.3                             | 0.9       | 99%         |
| 2     | 201         | 203        | 0.99     | 0.049519                                              | 0.013371  | 0.085377                           | 0.023332  | 0.012137                           | 0.000365  | 172.3                                  | 533.3     | 83.2                             | 21.8      | 77.8                             | 2.3       | 93%         |
| 3     | 651         | 743        | 0.88     | 0.045222                                              | 0.001859  | 0.074993                           | 0.002948  | 0.012094                           | 0.000171  |                                        |           | 73.4                             | 2.8       | 77.5                             | 1.1       | 94%         |
| 4     | 445         | 934        | 0.48     | 0.047957                                              | 0.003384  | 0.079885                           | 0.005591  | 0.012033                           | 0.000283  | 98.2                                   | 159.2     | 78.0                             | 5.3       | 77.1                             | 1.8       | 98%         |
| 5     | 713         | 815        | 0.87     | 0.045203                                              | 0.005262  | 0.075838                           | 0.008046  | 0.012160                           | 0.000321  |                                        |           | 74.2                             | 7.6       | 77.9                             | 2.0       | 95%         |
| 6     | 623         | 970        | 0.64     | 0.047539                                              | 0.001830  | 0.078555                           | 0.002880  | 0.011996                           | 0.000164  | 76.0                                   | 88.9      | 76.8                             | 2.7       | 76.9                             | 1.0       | 99%         |
| 7     | 518         | 766        | 0.68     | 0.046649                                              | 0.002794  | 0.077182                           | 0.004289  | 0.012033                           | 0.000164  | 31.6                                   | 137.0     | 75.5                             | 4.0       | 77.1                             | 1.0       | 97%         |
| 8     | 564         | 672        | 0.84     | 0.047074                                              | 0.002483  | 0.079109                           | 0.004654  | 0.012094                           | 0.000246  | 53.8                                   | 122.2     | 77.3                             | 4.4       | 77.5                             | 1.6       | 99%         |
| 9     | 175         | 304        | 0.58     | 0.049930                                              | 0.008879  | 0.083040                           | 0.014925  | 0.012055                           | 0.000539  | 190.8                                  | 370.3     | 81.0                             | 14.0      | 77.2                             | 3.4       | 95%         |
| 10    | 306         | 435        | 0.70     | 0.047161                                              | 0.005266  | 0.078620                           | 0.008298  | 0.012049                           | 0.000420  | 57.5                                   | 248.1     | 76.8                             | 7.8       | 77.2                             | 2.7       | 99%         |
| 11    | 466         | 663        | 0.70     | 0.048564                                              | 0.002661  | 0.080973                           | 0.004044  | 0.012078                           | 0.000201  | 127.9                                  | 122.2     | 79.1                             | 3.8       | 77.4                             | 1.3       | 97%         |
| 12    | 652         | 788        | 0.83     | 0.050085                                              | 0.007196  | 0.084663                           | 0.012165  | 0.012162                           | 0.000561  | 198.2                                  | 303.7     | 82.5                             | 11.4      | 77.9                             | 3.6       | 94%         |
| 13    | 444         | 558        | 0.80     | 0.048400                                              | 0.002076  | 0.080543                           | 0.003246  | 0.012053                           | 0.000148  | 120.5                                  | 101.8     | 78.7                             | 3.1       | 77.2                             | 0.9       | 98%         |
| 14    | 321         | 472        | 0.68     | 0.046645                                              | 0.003016  | 0.077532                           | 0.004933  | 0.012060                           | 0.000233  | 31.6                                   | 157.4     | 75.8                             | 4.6       | 77.3                             | 1.5       | 98%         |
| 15    | 572         | 658        | 0.87     | 0.047173                                              | 0.002512  | 0.079050                           | 0.004568  | 0.012050                           | 0.000226  | 57.5                                   | 131.5     | 77.3                             | 4.3       | 77.2                             | 1.4       | 99%         |
| 16    | 297         | 431        | 0.69     | 0.051207                                              | 0.002605  | 0.085602                           | 0.004546  | 0.012030                           | 0.000161  | 250.1                                  | 118.5     | 83.4                             | 4.3       | 77.1                             | 1.0       | 92%         |
| 17    | 400         | 531        | 0.75     | 0.044222                                              | 0.010048  | 0.072792                           | 0.013688  | 0.012050                           | 0.000438  |                                        |           | 71.3                             | 13.0      | 77.2                             | 2.8       | 92%         |
| 18    | 528         | 671        | 0.79     | 0.045636                                              | 0.001446  | 0.075788                           | 0.002432  | 0.012050                           | 0.000241  |                                        |           | 74.2                             | 2.3       | 77.2                             | 1.5       | 95%         |
| 19    | 485         | 725        | 0.67     | 0.048565                                              | 0.002000  | 0.080158                           | 0.002879  | 0.012103                           | 0.000242  | 127.9                                  | 93.5      | 78.3                             | 2.7       | 77.6                             | 1.5       | 99%         |
| 20    | 301         | 424        | 0.71     | 0.049753                                              | 0.003621  | 0.083672                           | 0.006387  | 0.012058                           | 0.000194  | 183.4                                  | -26.9     | 81.6                             | 6.0       | 77.3                             | 1.2       | 94%         |
| 21    | 473         | 543        | 0.87     | 0.046961                                              | 0.002238  | 0.077912                           | 0.003674  | 0.012061                           | 0.000189  | 55.7                                   | 111.1     | 76.2                             | 3.5       | 77.3                             | 1.2       | 98%         |
| 22    | 588         | 636        | 0.93     | 0.046492                                              | 0.003255  | 0.077182                           | 0.005306  | 0.012095                           | 0.000311  | 33.4                                   | 150.0     | 75.5                             | 5.0       | 77.5                             | 2.0       | 97%         |
| 23    | 752         | 1066       | 0.71     | 0.048650                                              | 0.001754  | 0.080827                           | 0.002873  | 0.012053                           | 0.000177  | 131.6                                  | 85.2      | 78.9                             | 2.7       | 77.2                             | 1.1       | 97%         |
| 24    | 402         | 594        | 0.68     | 0.051630                                              | 0.002272  | 0.086303                           | 0.004084  | 0.012040                           | 0.000147  | 333.4                                  | 101.8     | 84.1                             | 3.8       | 77.1                             | 0.9       | 91%         |

| Spots  | Th    | U     | Th   | Common-Pb-corrected isotopic ratios ( $\pm 1\sigma$ ) |           |                                    |           |                                    |           | Common-Pb-corrected isotopic ages (Ma) |           |                                  |           |                                  |           | err  |
|--------|-------|-------|------|-------------------------------------------------------|-----------|------------------------------------|-----------|------------------------------------|-----------|----------------------------------------|-----------|----------------------------------|-----------|----------------------------------|-----------|------|
|        | (ppm) | (ppm) | /U   | $^{207}\text{Pb}^*/^{206}\text{Pb}^*$                 | $1\sigma$ | $^{207}\text{Pb}^*/^{235}\text{U}$ | $1\sigma$ | $^{206}\text{Pb}^*/^{238}\text{U}$ | $1\sigma$ | $^{207}\text{Pb}/^{206}\text{Pb}$      | $1\sigma$ | $^{207}\text{Pb}/^{235}\text{U}$ | $1\sigma$ | $^{206}\text{Pb}/^{238}\text{U}$ | $1\sigma$ | corr |
| 25     | 504   | 547   | 0.92 | 0.047457                                              | 0.001836  | 0.078654                           | 0.003195  | 0.012042                           | 0.000194  | 72.3                                   | 88.9      | 76.9                             | 3.0       | 77.2                             | 1.2       | 99%  |
| 18T045 |       |       |      |                                                       |           |                                    |           |                                    |           |                                        |           |                                  |           |                                  |           |      |
| 1      | 115   | 292   | 0.39 | 0.047246                                              | 0.005030  | 0.076532                           | 0.007887  | 0.011845                           | 0.000208  | 61.2                                   | 237.0     | 74.9                             | 7.4       | 75.9                             | 1.3       | 98%  |
| 2      | 476   | 1270  | 0.37 | 0.047836                                              | 0.002527  | 0.078215                           | 0.003767  | 0.011925                           | 0.000140  | 100.1                                  | 112.9     | 76.5                             | 3.5       | 76.4                             | 0.9       | 99%  |
| 3      | 687   | 1165  | 0.59 | 0.048276                                              | 0.001567  | 0.079236                           | 0.002580  | 0.011905                           | 0.000121  | 122.3                                  | 75.9      | 77.4                             | 2.4       | 76.3                             | 0.8       | 98%  |
| 4      | 108   | 300   | 0.36 | 0.048979                                              | 0.005395  | 0.080543                           | 0.009247  | 0.011840                           | 0.000303  | 146.4                                  | 240.7     | 78.7                             | 8.7       | 75.9                             | 1.9       | 96%  |
| 5      | 293   | 400   | 0.73 | 0.049337                                              | 0.004049  | 0.081174                           | 0.007338  | 0.011862                           | 0.000435  | 164.9                                  | 181.5     | 79.2                             | 6.9       | 76.0                             | 2.8       | 95%  |
| 6      | 2116  | 1070  | 1.98 | 0.048863                                              | 0.001755  | 0.080431                           | 0.003445  | 0.011888                           | 0.000153  | 142.7                                  | 89.8      | 78.5                             | 3.2       | 76.2                             | 1.0       | 96%  |
| 7      | 2695  | 1408  | 1.91 | 0.045689                                              | 0.001808  | 0.074412                           | 0.002987  | 0.011813                           | 0.000147  |                                        |           | 72.9                             | 2.8       | 75.7                             | 0.9       | 96%  |
| 8      | 349   | 359   | 0.97 | 0.048228                                              | 0.002749  | 0.078872                           | 0.004719  | 0.011807                           | 0.000214  | 109.4                                  | 129.6     | 77.1                             | 4.4       | 75.7                             | 1.4       | 98%  |
| 9      | 1403  | 733   | 1.91 | 0.044961                                              | 0.002006  | 0.073584                           | 0.003196  | 0.011900                           | 0.000191  |                                        |           | 72.1                             | 3.0       | 76.3                             | 1.2       | 94%  |
| 10     | 1371  | 840   | 1.63 | 0.048338                                              | 0.002606  | 0.078414                           | 0.003859  | 0.011870                           | 0.000198  | 122.3                                  | 116.6     | 76.7                             | 3.6       | 76.1                             | 1.3       | 99%  |
| 11     | 1324  | 802   | 1.65 | 0.046276                                              | 0.002327  | 0.075482                           | 0.003515  | 0.011896                           | 0.000192  | 13.1                                   | 114.8     | 73.9                             | 3.3       | 76.2                             | 1.2       | 96%  |
| 12     | 711   | 1264  | 0.56 | 0.046965                                              | 0.001860  | 0.076736                           | 0.002859  | 0.011887                           | 0.000135  | 55.7                                   | 83.3      | 75.1                             | 2.7       | 76.2                             | 0.9       | 98%  |
| 13     | 1189  | 819   | 1.45 | 0.049260                                              | 0.001710  | 0.081000                           | 0.002896  | 0.011921                           | 0.000130  | 166.8                                  | 81.5      | 79.1                             | 2.7       | 76.4                             | 0.8       | 96%  |
| 14     | 2015  | 1123  | 1.79 | 0.044785                                              | 0.002875  | 0.073830                           | 0.005128  | 0.011912                           | 0.000236  |                                        |           | 72.3                             | 4.8       | 76.3                             | 1.5       | 94%  |
| 15     | 586   | 468   | 1.25 | 0.044609                                              | 0.003731  | 0.072695                           | 0.005554  | 0.011936                           | 0.000216  |                                        |           | 71.3                             | 5.3       | 76.5                             | 1.4       | 92%  |
| 16     | 916   | 690   | 1.33 | 0.048133                                              | 0.003101  | 0.078465                           | 0.004648  | 0.011889                           | 0.000199  | 105.6                                  | 144.4     | 76.7                             | 4.4       | 76.2                             | 1.3       | 99%  |
| 17     | 960   | 696   | 1.38 | 0.049868                                              | 0.002745  | 0.081638                           | 0.004601  | 0.011889                           | 0.000205  | 187.1                                  | 134.2     | 79.7                             | 4.3       | 76.2                             | 1.3       | 95%  |
| 18     | 393   | 507   | 0.78 | 0.046615                                              | 0.003305  | 0.076619                           | 0.005550  | 0.011887                           | 0.000240  | 27.9                                   | 162.9     | 75.0                             | 5.2       | 76.2                             | 1.5       | 98%  |
| 19     | 4039  | 1855  | 2.18 | 0.048299                                              | 0.002040  | 0.079300                           | 0.003203  | 0.011924                           | 0.000153  | 122.3                                  | 100.0     | 77.5                             | 3.0       | 76.4                             | 1.0       | 98%  |
| 20     | 105   | 257   | 0.41 | 0.049797                                              | 0.007025  | 0.080964                           | 0.010819  | 0.012023                           | 0.000350  | 187.1                                  | 296.3     | 79.1                             | 10.2      | 77.0                             | 2.2       | 97%  |
| 21     | 102   | 306   | 0.33 | 0.048509                                              | 0.006447  | 0.078530                           | 0.009697  | 0.011917                           | 0.000238  | 124.2                                  | 285.2     | 76.8                             | 9.1       | 76.4                             | 1.5       | 99%  |
| 18T048 |       |       |      |                                                       |           |                                    |           |                                    |           |                                        |           |                                  |           |                                  |           |      |

| Spots | Th<br>(ppm) | U<br>(ppm) | Th<br>/U | Common-Pb-corrected isotopic ratios ( $\pm 1\sigma$ ) |           |                                    |           |                                    |           | Common-Pb-corrected isotopic ages (Ma) |           |                                  |           |                                  |           | err<br>corr |
|-------|-------------|------------|----------|-------------------------------------------------------|-----------|------------------------------------|-----------|------------------------------------|-----------|----------------------------------------|-----------|----------------------------------|-----------|----------------------------------|-----------|-------------|
|       |             |            |          | $^{207}\text{Pb}^*/^{206}\text{Pb}^*$                 | $1\sigma$ | $^{207}\text{Pb}^*/^{235}\text{U}$ | $1\sigma$ | $^{206}\text{Pb}^*/^{238}\text{U}$ | $1\sigma$ | $^{207}\text{Pb}/^{206}\text{Pb}$      | $1\sigma$ | $^{207}\text{Pb}/^{235}\text{U}$ | $1\sigma$ | $^{206}\text{Pb}/^{238}\text{U}$ | $1\sigma$ |             |
| 1     | 218         | 319        | 0.68     | 0.049117                                              | 0.005092  | 0.083618                           | 0.009468  | 0.012130                           | 0.000338  | 153.8                                  | 235.2     | 81.5                             | 8.9       | 77.7                             | 2.2       | 95%         |
| 2     | 828         | 986        | 0.84     | 0.046455                                              | 0.002192  | 0.077356                           | 0.003759  | 0.012037                           | 0.000251  | 20.5                                   | 111.1     | 75.7                             | 3.5       | 77.1                             | 1.6       | 98%         |
| 3     | 654         | 770        | 0.85     | 0.047230                                              | 0.002270  | 0.077824                           | 0.003744  | 0.012075                           | 0.000266  | 61.2                                   | 111.1     | 76.1                             | 3.5       | 77.4                             | 1.7       | 98%         |
| 4     | 427         | 614        | 0.69     | 0.049391                                              | 0.004283  | 0.082493                           | 0.007202  | 0.012103                           | 0.000315  | 164.9                                  | 201.8     | 80.5                             | 6.8       | 77.6                             | 2.0       | 96%         |
| 5     | 383         | 616        | 0.62     | 0.046305                                              | 0.002467  | 0.077509                           | 0.004261  | 0.012060                           | 0.000236  | 13.1                                   | 187.0     | 75.8                             | 4.0       | 77.3                             | 1.5       | 98%         |
| 6     | 335         | 562        | 0.60     | 0.046768                                              | 0.001863  | 0.079148                           | 0.003192  | 0.012307                           | 0.000201  | 39.0                                   | 92.6      | 77.3                             | 3.0       | 78.9                             | 1.3       | 98%         |
| 7     | 972         | 1198       | 0.81     | 0.051209                                              | 0.002699  | 0.085153                           | 0.004278  | 0.012120                           | 0.000217  | 250.1                                  | 122.2     | 83.0                             | 4.0       | 77.7                             | 1.4       | 93%         |
| 8     | 590         | 1048       | 0.56     | 0.048132                                              | 0.001716  | 0.080579                           | 0.002903  | 0.012147                           | 0.000136  | 105.6                                  | 83.3      | 78.7                             | 2.7       | 77.8                             | 0.9       | 98%         |
| 9     | 478         | 972        | 0.49     | 0.050523                                              | 0.001856  | 0.084654                           | 0.003402  | 0.012122                           | 0.000187  | 220.4                                  | 85.2      | 82.5                             | 3.2       | 77.7                             | 1.2       | 93%         |
| 10    | 321         | 598        | 0.54     | 0.050556                                              | 0.001949  | 0.083625                           | 0.003066  | 0.012083                           | 0.000165  | 220.4                                  | 88.9      | 81.5                             | 2.9       | 77.4                             | 1.0       | 94%         |
| 11    | 326         | 421        | 0.77     | 0.049738                                              | 0.003731  | 0.082131                           | 0.006196  | 0.012054                           | 0.000255  | 183.4                                  | 166.6     | 80.1                             | 5.8       | 77.2                             | 1.6       | 96%         |
| 12    | 476         | 646        | 0.74     | 0.047839                                              | 0.002645  | 0.079847                           | 0.004702  | 0.012137                           | 0.000225  | 100.1                                  | 116.7     | 78.0                             | 4.4       | 77.8                             | 1.4       | 99%         |
| 13    | 406         | 518        | 0.78     | 0.048512                                              | 0.003362  | 0.080861                           | 0.005625  | 0.012087                           | 0.000177  | 124.2                                  | 155.5     | 79.0                             | 5.3       | 77.5                             | 1.1       | 98%         |
| 14    | 901         | 946        | 0.95     | 0.050721                                              | 0.002206  | 0.083996                           | 0.003693  | 0.012107                           | 0.000193  | 227.8                                  | 100.0     | 81.9                             | 3.5       | 77.6                             | 1.2       | 94%         |
| 15    | 217         | 417        | 0.52     | 0.049355                                              | 0.004706  | 0.081173                           | 0.006756  | 0.012147                           | 0.000328  | 164.9                                  | 207.4     | 79.2                             | 6.3       | 77.8                             | 2.1       | 98%         |
| 16    | 546         | 656        | 0.83     | 0.048012                                              | 0.002216  | 0.079293                           | 0.003488  | 0.012045                           | 0.000175  | 98.2                                   | 107.4     | 77.5                             | 3.3       | 77.2                             | 1.1       | 99%         |
| 17    | 894         | 936        | 0.96     | 0.046573                                              | 0.002665  | 0.078475                           | 0.005774  | 0.012132                           | 0.000389  | 33.4                                   | 133.3     | 76.7                             | 5.4       | 77.7                             | 2.5       | 98%         |
| 18    | 567         | 559        | 1.01     | 0.049477                                              | 0.004642  | 0.083051                           | 0.008025  | 0.012127                           | 0.000220  | 172.3                                  | 203.7     | 81.0                             | 7.5       | 77.7                             | 1.4       | 95%         |

## Supplemental Table S2

### Zircon Hf isotopic data of the studied samples across the Bangong-Nujiang suture zone

| Sample        | $^{176}\text{Yb}/^{177}\text{Hf}$ | $2\sigma$ | $^{176}\text{Lu}/^{177}\text{Hf}$ | $2\sigma$ | $^{176}\text{Hf}/^{177}\text{Hf}$ | $2\sigma$ | $^{176}\text{Hf}/^{177}\text{Hf}_i$ | $\varepsilon_{\text{Hf}}(0)$ | $\varepsilon_{\text{Hf}}(t)$ | $2\sigma$ | $T_{\text{DM}}$ (Ma) | $T_{\text{DM}}^{\text{C}}$ (Ma) | $f_{\text{Lu/Hf}}$ |
|---------------|-----------------------------------|-----------|-----------------------------------|-----------|-----------------------------------|-----------|-------------------------------------|------------------------------|------------------------------|-----------|----------------------|---------------------------------|--------------------|
| <b>18T074</b> |                                   |           |                                   |           |                                   |           |                                     |                              |                              |           |                      |                                 |                    |
| 18T074-1      | 0.032361                          | 0.000529  | 0.001094                          | 0.000011  | 0.282681                          | 0.000026  | 0.282678                            | -3.2                         | -0.9                         | 0.9       | 812                  | 1227                            | -0.97              |
| 18T074-2      | 0.034196                          | 0.000246  | 0.001254                          | 0.000014  | 0.282627                          | 0.000021  | 0.282624                            | -5.1                         | -2.8                         | 0.7       | 892                  | 1349                            | -0.96              |
| 18T074-3      | 0.043361                          | 0.001958  | 0.001447                          | 0.000054  | 0.282709                          | 0.000023  | 0.282706                            | -2.2                         | 0.1                          | 0.8       | 779                  | 1163                            | -0.96              |
| 18T074-4      | 0.029741                          | 0.000222  | 0.001007                          | 0.000006  | 0.282713                          | 0.000023  | 0.282711                            | -2.1                         | 0.3                          | 0.8       | 764                  | 1153                            | -0.97              |
| 18T074-5      | 0.031233                          | 0.000647  | 0.001089                          | 0.000033  | 0.282705                          | 0.000024  | 0.282703                            | -2.4                         | 0.0                          | 0.9       | 777                  | 1171                            | -0.97              |
| 18T074-6      | 0.036189                          | 0.000802  | 0.001221                          | 0.000021  | 0.282679                          | 0.000024  | 0.282676                            | -3.3                         | -1.0                         | 0.8       | 818                  | 1231                            | -0.96              |
| 18T074-7      | 0.094294                          | 0.001058  | 0.003341                          | 0.000073  | 0.282712                          | 0.000030  | 0.282705                            | -2.1                         | 0.0                          | 1.1       | 817                  | 1167                            | -0.90              |
| 18T074-8      | 0.041297                          | 0.000825  | 0.001373                          | 0.000034  | 0.282701                          | 0.000020  | 0.282698                            | -2.5                         | -0.2                         | 0.7       | 790                  | 1182                            | -0.96              |
| 18T074-9      | 0.050531                          | 0.000193  | 0.001710                          | 0.000012  | 0.282785                          | 0.000024  | 0.282781                            | 0.4                          | 2.7                          | 0.8       | 676                  | 995                             | -0.95              |
| 18T074-10     | 0.021504                          | 0.000225  | 0.000755                          | 0.000006  | 0.282614                          | 0.000024  | 0.282613                            | -5.6                         | -3.2                         | 0.9       | 898                  | 1375                            | -0.98              |
| 18T074-11     | 0.033803                          | 0.000492  | 0.001178                          | 0.000013  | 0.282740                          | 0.000025  | 0.282738                            | -1.1                         | 1.2                          | 0.9       | 729                  | 1092                            | -0.96              |
| 18T074-12     | 0.041135                          | 0.000489  | 0.001393                          | 0.000007  | 0.282730                          | 0.000024  | 0.282727                            | -1.5                         | 0.8                          | 0.9       | 748                  | 1117                            | -0.96              |
| 18T074-13     | 0.027639                          | 0.000371  | 0.001013                          | 0.000019  | 0.282715                          | 0.000025  | 0.282713                            | -2.0                         | 0.3                          | 0.9       | 761                  | 1148                            | -0.97              |
| 18T074-14     | 0.051886                          | 0.000493  | 0.001944                          | 0.000019  | 0.282727                          | 0.000030  | 0.282723                            | -1.6                         | 0.7                          | 1.0       | 764                  | 1127                            | -0.94              |
| 18T074-15     | 0.033702                          | 0.000324  | 0.001169                          | 0.000010  | 0.282748                          | 0.000022  | 0.282746                            | -0.8                         | 1.5                          | 0.8       | 718                  | 1074                            | -0.96              |
| <b>19T921</b> |                                   |           |                                   |           |                                   |           |                                     |                              |                              |           |                      |                                 |                    |
| 19T921-1      | 0.058976                          | 0.000318  | 0.001985                          | 0.000005  | 0.282621                          | 0.000019  | 0.282616                            | -5.4                         | -3.0                         | 0.7       | 919                  | 1362                            | -0.94              |
| 19T921-2      | 0.055221                          | 0.001356  | 0.001845                          | 0.000047  | 0.282740                          | 0.000015  | 0.282736                            | -1.1                         | 1.3                          | 0.5       | 742                  | 1092                            | -0.94              |
| 19T921-3      | 0.050030                          | 0.000546  | 0.001618                          | 0.000013  | 0.282662                          | 0.000016  | 0.282659                            | -3.9                         | -1.5                         | 0.6       | 850                  | 1266                            | -0.95              |
| 19T921-4      | 0.100120                          | 0.002428  | 0.003426                          | 0.000096  | 0.282745                          | 0.000018  | 0.282738                            | -0.9                         | 1.3                          | 0.6       | 768                  | 1088                            | -0.90              |
| 19T921-5      | 0.071802                          | 0.001531  | 0.002302                          | 0.000048  | 0.282722                          | 0.000017  | 0.282717                            | -1.8                         | 0.6                          | 0.6       | 778                  | 1134                            | -0.93              |

| Sample        | $^{176}\text{Yb}/^{177}\text{Hf}$ | 2 $\sigma$ | $^{176}\text{Lu}/^{177}\text{Hf}$ | 2 $\sigma$ | $^{176}\text{Hf}/^{177}\text{Hf}$ | 2 $\sigma$ | $^{176}\text{Hf}/^{177}\text{Hf}$ | $\varepsilon_{\text{Hf}}(0)$ | $\varepsilon_{\text{Hf}}(t)$ | 2 $\sigma$ | T <sub>DM</sub> (Ma) | T <sub>DM</sub> <sup>C</sup> (Ma) | f <sub>Lu/Hf</sub> |
|---------------|-----------------------------------|------------|-----------------------------------|------------|-----------------------------------|------------|-----------------------------------|------------------------------|------------------------------|------------|----------------------|-----------------------------------|--------------------|
| 19T921-6      | 0.031063                          | 0.000437   | 0.001023                          | 0.000016   | 0.282687                          | 0.000017   | 0.282685                          | -3.0                         | -0.5                         | 0.6        | 802                  | 1208                              | -0.97              |
| 19T921-7      | 0.063968                          | 0.004598   | 0.001728                          | 0.000098   | 0.282711                          | 0.000019   | 0.282707                          | -2.2                         | 0.2                          | 0.7        | 783                  | 1158                              | -0.95              |
| 19T921-8      | 0.049966                          | 0.000823   | 0.001614                          | 0.000018   | 0.282647                          | 0.000017   | 0.282643                          | -4.4                         | -2.0                         | 0.6        | 872                  | 1302                              | -0.95              |
| 19T921-9      | 0.068278                          | 0.002311   | 0.002214                          | 0.000063   | 0.282687                          | 0.000020   | 0.282682                          | -3.0                         | -0.6                         | 0.7        | 828                  | 1214                              | -0.93              |
| 19T921-10     | 0.069504                          | 0.001290   | 0.002007                          | 0.000033   | 0.282702                          | 0.000014   | 0.282698                          | -2.5                         | -0.1                         | 0.5        | 801                  | 1179                              | -0.94              |
| 19T921-11     | 0.074534                          | 0.000694   | 0.002415                          | 0.000022   | 0.282708                          | 0.000017   | 0.282703                          | -2.3                         | 0.1                          | 0.6        | 801                  | 1167                              | -0.93              |
| <b>18T309</b> |                                   |            |                                   |            |                                   |            |                                   |                              |                              |            |                      |                                   |                    |
| 18T309-1      | 0.053176                          | 0.000294   | 0.001766                          | 0.000006   | 0.282695                          | 0.000021   | 0.282691                          | -2.7                         | -0.4                         | 0.7        | 806                  | 1195                              | -0.95              |
| 18T309-2      | 0.036809                          | 0.001100   | 0.001259                          | 0.000033   | 0.282646                          | 0.000021   | 0.282643                          | -4.5                         | -2.1                         | 0.7        | 865                  | 1303                              | -0.96              |
| 18T309-3      | 0.042709                          | 0.000842   | 0.001427                          | 0.000031   | 0.282674                          | 0.000025   | 0.282671                          | -3.5                         | -1.1                         | 0.9        | 830                  | 1241                              | -0.96              |
| 18T309-4      | 0.033343                          | 0.000592   | 0.001190                          | 0.000032   | 0.282646                          | 0.000020   | 0.282643                          | -4.5                         | -2.1                         | 0.7        | 864                  | 1303                              | -0.96              |
| 18T309-5      | 0.029503                          | 0.000211   | 0.001017                          | 0.000008   | 0.282654                          | 0.000020   | 0.282652                          | -4.2                         | -1.8                         | 0.7        | 848                  | 1284                              | -0.97              |
| 18T309-6      | 0.035717                          | 0.000605   | 0.001212                          | 0.000026   | 0.282599                          | 0.000021   | 0.282597                          | -6.1                         | -3.7                         | 0.7        | 930                  | 1407                              | -0.96              |
| 18T309-7      | 0.061537                          | 0.002170   | 0.002069                          | 0.000088   | 0.282606                          | 0.000020   | 0.282602                          | -5.9                         | -3.5                         | 0.7        | 941                  | 1395                              | -0.94              |
| 18T309-8      | 0.027818                          | 0.000236   | 0.000957                          | 0.000009   | 0.282663                          | 0.000019   | 0.282661                          | -3.9                         | -1.4                         | 0.7        | 834                  | 1263                              | -0.97              |
| 18T309-9      | 0.047540                          | 0.002339   | 0.001397                          | 0.000052   | 0.282669                          | 0.000017   | 0.282666                          | -3.6                         | -1.2                         | 0.6        | 835                  | 1252                              | -0.96              |
| 18T309-10     | 0.038471                          | 0.000473   | 0.001324                          | 0.000016   | 0.282609                          | 0.000018   | 0.282606                          | -5.8                         | -3.4                         | 0.6        | 919                  | 1387                              | -0.96              |
| 18T309-11     | 0.139149                          | 0.002828   | 0.005116                          | 0.000106   | 0.282662                          | 0.000031   | 0.282651                          | -3.9                         | -1.8                         | 1.1        | 939                  | 1285                              | -0.85              |
| 18T309-12     | 0.036491                          | 0.002660   | 0.001200                          | 0.000077   | 0.282665                          | 0.000023   | 0.282663                          | -3.8                         | -1.4                         | 0.8        | 836                  | 1259                              | -0.96              |
| 18T309-13     | 0.059004                          | 0.001547   | 0.001780                          | 0.000044   | 0.282645                          | 0.000021   | 0.282641                          | -4.5                         | -2.1                         | 0.7        | 879                  | 1307                              | -0.95              |
| 18T309-14     | 0.049394                          | 0.001003   | 0.001708                          | 0.000049   | 0.282679                          | 0.000024   | 0.282676                          | -3.3                         | -0.9                         | 0.9        | 827                  | 1229                              | -0.95              |
| 18T309-15     | 0.042668                          | 0.000529   | 0.001419                          | 0.000026   | 0.282636                          | 0.000015   | 0.282633                          | -4.8                         | -2.4                         | 0.5        | 883                  | 1327                              | -0.96              |
| <b>18T297</b> |                                   |            |                                   |            |                                   |            |                                   |                              |                              |            |                      |                                   |                    |
| 18T297-1      | 0.031659                          | 0.000446   | 0.001057                          | 0.000015   | 0.282409                          | 0.000018   | 0.282407                          | -12.8                        | -10.4                        | 0.6        | 1194                 | 1834                              | -0.97              |
| 18T297-2      | 0.049695                          | 0.001039   | 0.001605                          | 0.000030   | 0.282506                          | 0.000020   | 0.282503                          | -9.4                         | -7.1                         | 0.7        | 1073                 | 1619                              | -0.95              |

| Sample        | $^{176}\text{Yb}/^{177}\text{Hf}$ | $2\sigma$ | $^{176}\text{Lu}/^{177}\text{Hf}$ | $2\sigma$ | $^{176}\text{Hf}/^{177}\text{Hf}$ | $2\sigma$ | $^{176}\text{Hf}/^{177}\text{Hf}_i$ | $\varepsilon_{\text{Hf}}(0)$ | $\varepsilon_{\text{Hf}}(t)$ | $2\sigma$ | $T_{\text{DM}}$ (Ma) | $T_{\text{DM}}^{\text{C}}$ (Ma) | $f_{\text{Lu/Hf}}$ |
|---------------|-----------------------------------|-----------|-----------------------------------|-----------|-----------------------------------|-----------|-------------------------------------|------------------------------|------------------------------|-----------|----------------------|---------------------------------|--------------------|
| 18T297-3      | 0.031087                          | 0.000282  | 0.001019                          | 0.000009  | 0.282459                          | 0.000020  | 0.282457                            | -11.1                        | -8.7                         | 0.7       | 1122                 | 1721                            | -0.97              |
| 18T297-4      | 0.027404                          | 0.000580  | 0.000902                          | 0.000015  | 0.282424                          | 0.000017  | 0.282422                            | -12.3                        | -9.9                         | 0.6       | 1168                 | 1800                            | -0.97              |
| 18T297-5      | 0.039334                          | 0.000979  | 0.001300                          | 0.000030  | 0.282470                          | 0.000020  | 0.282467                            | -10.7                        | -8.3                         | 0.7       | 1115                 | 1698                            | -0.96              |
| 18T297-6      | 0.023895                          | 0.000717  | 0.000820                          | 0.000027  | 0.282480                          | 0.000019  | 0.282478                            | -10.3                        | -7.9                         | 0.7       | 1088                 | 1674                            | -0.98              |
| 18T297-7      | 0.029291                          | 0.000270  | 0.001001                          | 0.000009  | 0.282425                          | 0.000023  | 0.282423                            | -12.3                        | -9.9                         | 0.8       | 1169                 | 1797                            | -0.97              |
| 18T297-8      | 0.034845                          | 0.000328  | 0.001145                          | 0.000010  | 0.282484                          | 0.000021  | 0.282481                            | -10.2                        | -7.8                         | 0.8       | 1092                 | 1667                            | -0.97              |
| 18T297-9      | 0.028231                          | 0.000931  | 0.000959                          | 0.000030  | 0.282401                          | 0.000019  | 0.282399                            | -13.1                        | -10.7                        | 0.7       | 1202                 | 1850                            | -0.97              |
| 18T297-10     | 0.019567                          | 0.000044  | 0.000681                          | 0.000001  | 0.282452                          | 0.000018  | 0.282450                            | -11.3                        | -8.9                         | 0.6       | 1123                 | 1737                            | -0.98              |
| 18T297-11     | 0.026856                          | 0.000247  | 0.000923                          | 0.000008  | 0.282466                          | 0.000019  | 0.282464                            | -10.8                        | -8.4                         | 0.7       | 1109                 | 1705                            | -0.97              |
| 18T297-12     | 0.029696                          | 0.001226  | 0.001009                          | 0.000042  | 0.282427                          | 0.000020  | 0.282425                            | -12.2                        | -9.8                         | 0.7       | 1168                 | 1793                            | -0.97              |
| 18T297-13     | 0.028852                          | 0.000357  | 0.000986                          | 0.000008  | 0.282455                          | 0.000019  | 0.282453                            | -11.2                        | -8.8                         | 0.7       | 1128                 | 1731                            | -0.97              |
| 18T297-14     | 0.023090                          | 0.000270  | 0.000821                          | 0.000008  | 0.282453                          | 0.000017  | 0.282451                            | -11.3                        | -8.9                         | 0.6       | 1125                 | 1734                            | -0.98              |
| 18T297-15     | 0.030254                          | 0.000790  | 0.001026                          | 0.000023  | 0.282456                          | 0.000017  | 0.282454                            | -11.2                        | -8.8                         | 0.6       | 1127                 | 1728                            | -0.97              |
| <b>17T418</b> |                                   |           |                                   |           |                                   |           |                                     |                              |                              |           |                      |                                 |                    |
| 17T418-1      | 0.035270                          | 0.000908  | 0.001163                          | 0.000045  | 0.282558                          | 0.000026  | 0.282556                            | -7.6                         | -5.1                         | 0.9       | 987                  | 1498                            | -0.96              |
| 17T418-2      | 0.035413                          | 0.000532  | 0.001098                          | 0.000012  | 0.282605                          | 0.000021  | 0.282603                            | -5.9                         | -3.4                         | 0.8       | 919                  | 1392                            | -0.97              |
| 17T418-3      | 0.028675                          | 0.000541  | 0.000851                          | 0.000017  | 0.282521                          | 0.000019  | 0.282519                            | -8.9                         | -6.4                         | 0.7       | 1032                 | 1581                            | -0.97              |
| 17T418-4      | 0.035787                          | 0.000630  | 0.001014                          | 0.000014  | 0.282567                          | 0.000020  | 0.282565                            | -7.3                         | -4.8                         | 0.7       | 971                  | 1478                            | -0.97              |
| 17T418-5      | 0.019923                          | 0.000233  | 0.000573                          | 0.000010  | 0.282610                          | 0.000018  | 0.282608                            | -5.7                         | -3.2                         | 0.6       | 900                  | 1380                            | -0.98              |
| 17T418-6      | 0.028692                          | 0.000418  | 0.000776                          | 0.000015  | 0.282508                          | 0.000016  | 0.282506                            | -9.3                         | -6.9                         | 0.6       | 1047                 | 1609                            | -0.98              |
| 17T418-7      | 0.034289                          | 0.000224  | 0.001027                          | 0.000009  | 0.282684                          | 0.000018  | 0.282681                            | -3.1                         | -0.7                         | 0.6       | 807                  | 1216                            | -0.97              |
| 17T418-8      | 0.018645                          | 0.000221  | 0.000465                          | 0.000007  | 0.282650                          | 0.000016  | 0.282649                            | -4.3                         | -1.8                         | 0.6       | 842                  | 1290                            | -0.99              |
| 17T418-9      | 0.046746                          | 0.000940  | 0.001524                          | 0.000051  | 0.282574                          | 0.000022  | 0.282571                            | -7.0                         | -4.6                         | 0.8       | 973                  | 1463                            | -0.95              |
| 17T418-10     | 0.042712                          | 0.000587  | 0.001338                          | 0.000040  | 0.282583                          | 0.000020  | 0.282580                            | -6.7                         | -4.3                         | 0.7       | 957                  | 1444                            | -0.96              |
| 17T418-11     | 0.020717                          | 0.001103  | 0.000671                          | 0.000045  | 0.282664                          | 0.000017  | 0.282662                            | -3.8                         | -1.3                         | 0.6       | 827                  | 1259                            | -0.98              |

| Sample        | $^{176}\text{Yb}/^{177}\text{Hf}$ | $2\sigma$ | $^{176}\text{Lu}/^{177}\text{Hf}$ | $2\sigma$ | $^{176}\text{Hf}/^{177}\text{Hf}$ | $2\sigma$ | $^{176}\text{Hf}/^{177}\text{Hf}_i$ | $\varepsilon_{\text{Hf}}(0)$ | $\varepsilon_{\text{Hf}}(t)$ | $2\sigma$ | $T_{\text{DM}} \text{ (Ma)}$ | $T_{\text{DM}}^{\text{C}} \text{ (Ma)}$ | $f_{\text{Lu/Hf}}$ |
|---------------|-----------------------------------|-----------|-----------------------------------|-----------|-----------------------------------|-----------|-------------------------------------|------------------------------|------------------------------|-----------|------------------------------|-----------------------------------------|--------------------|
| 17T418-12     | 0.032833                          | 0.000849  | 0.000966                          | 0.000020  | 0.282564                          | 0.000019  | 0.282562                            | -7.3                         | -4.9                         | 0.7       | 973                          | 1483                                    | -0.97              |
| 17T418-13     | 0.039555                          | 0.000373  | 0.001158                          | 0.000010  | 0.282652                          | 0.000020  | 0.282649                            | -4.3                         | -1.8                         | 0.7       | 855                          | 1289                                    | -0.97              |
| 17T418-14     | 0.044386                          | 0.001552  | 0.001297                          | 0.000039  | 0.282616                          | 0.000023  | 0.282614                            | -5.5                         | -3.1                         | 0.8       | 908                          | 1368                                    | -0.96              |
| 17T418-15     | 0.033553                          | 0.001165  | 0.001008                          | 0.000030  | 0.282602                          | 0.000019  | 0.282599                            | -6.0                         | -3.6                         | 0.7       | 922                          | 1400                                    | -0.97              |
| <b>17T286</b> |                                   |           |                                   |           |                                   |           |                                     |                              |                              |           |                              |                                         |                    |
| 17T286-1      | 0.036137                          | 0.000388  | 0.001195                          | 0.000006  | 0.282712                          | 0.000016  | 0.282710                            | -2.1                         | 0.3                          | 0.6       | 770                          | 1154                                    | -0.96              |
| 17T286-2      | 0.021909                          | 0.000087  | 0.000684                          | 0.000002  | 0.282645                          | 0.000015  | 0.282644                            | -4.5                         | -2.0                         | 0.5       | 853                          | 1302                                    | -0.98              |
| 17T286-3      | 0.028602                          | 0.001235  | 0.000995                          | 0.000053  | 0.282672                          | 0.000024  | 0.282670                            | -3.5                         | -1.1                         | 0.8       | 822                          | 1243                                    | -0.97              |
| 17T286-4      | 0.025470                          | 0.000600  | 0.000801                          | 0.000018  | 0.282678                          | 0.000018  | 0.282676                            | -3.3                         | -0.9                         | 0.6       | 810                          | 1230                                    | -0.98              |
| 17T286-5      | 0.039619                          | 0.000412  | 0.001315                          | 0.000029  | 0.282620                          | 0.000021  | 0.282617                            | -5.4                         | -3.0                         | 0.7       | 903                          | 1361                                    | -0.96              |
| 17T286-6      | 0.035669                          | 0.000451  | 0.001174                          | 0.000026  | 0.282591                          | 0.000015  | 0.282588                            | -6.4                         | -4.0                         | 0.5       | 941                          | 1427                                    | -0.96              |
| 17T286-7      | 0.043599                          | 0.001016  | 0.001384                          | 0.000041  | 0.282549                          | 0.000018  | 0.282546                            | -7.9                         | -5.5                         | 0.7       | 1005                         | 1521                                    | -0.96              |
| 17T286-8      | 0.035700                          | 0.000254  | 0.001127                          | 0.000007  | 0.282602                          | 0.000018  | 0.282599                            | -6.0                         | -3.6                         | 0.6       | 925                          | 1403                                    | -0.97              |
| 17T286-9      | 0.034383                          | 0.000310  | 0.001106                          | 0.000008  | 0.282603                          | 0.000020  | 0.282601                            | -6.0                         | -3.6                         | 0.7       | 922                          | 1398                                    | -0.97              |
| 17T286-10     | 0.038349                          | 0.000228  | 0.001212                          | 0.000009  | 0.282594                          | 0.000018  | 0.282591                            | -6.3                         | -3.9                         | 0.6       | 938                          | 1421                                    | -0.96              |
| 17T286-11     | 0.035546                          | 0.000122  | 0.001134                          | 0.000007  | 0.282567                          | 0.000016  | 0.282565                            | -7.3                         | -4.9                         | 0.6       | 974                          | 1480                                    | -0.97              |
| 17T286-12     | 0.046515                          | 0.000319  | 0.001737                          | 0.000011  | 0.282601                          | 0.000020  | 0.282597                            | -6.0                         | -3.7                         | 0.7       | 941                          | 1406                                    | -0.95              |
| 17T286-13     | 0.031049                          | 0.000261  | 0.000990                          | 0.000009  | 0.282670                          | 0.000020  | 0.282668                            | -3.6                         | -1.2                         | 0.7       | 825                          | 1248                                    | -0.97              |
| 17T286-14     | 0.031337                          | 0.001157  | 0.001019                          | 0.000044  | 0.282571                          | 0.000022  | 0.282569                            | -7.1                         | -4.7                         | 0.8       | 965                          | 1470                                    | -0.97              |
| <b>18T062</b> |                                   |           |                                   |           |                                   |           |                                     |                              |                              |           |                              |                                         |                    |
| 18T062-1      | 0.020247                          | 0.000113  | 0.000570                          | 0.000003  | 0.282740                          | 0.000023  | 0.282739                            | -1.1                         | 1.3                          | 0.8       | 718                          | 1089                                    | -0.98              |
| 18T062-2      | 0.053949                          | 0.001069  | 0.001458                          | 0.000033  | 0.282832                          | 0.000026  | 0.282829                            | 2.1                          | 4.5                          | 0.9       | 603                          | 885                                     | -0.96              |
| 18T062-3      | 0.019514                          | 0.000227  | 0.000556                          | 0.000001  | 0.282703                          | 0.000024  | 0.282701                            | -2.5                         | 0.0                          | 0.8       | 770                          | 1173                                    | -0.98              |
| 18T062-4      | 0.011362                          | 0.000400  | 0.000289                          | 0.000016  | 0.282678                          | 0.000019  | 0.282678                            | -3.3                         | -0.9                         | 0.7       | 798                          | 1227                                    | -0.99              |
| 18T062-5      | 0.026436                          | 0.000782  | 0.000775                          | 0.000026  | 0.282682                          | 0.000023  | 0.282680                            | -3.2                         | -0.8                         | 0.8       | 804                          | 1222                                    | -0.98              |



| Sample        | $^{176}\text{Yb}/^{177}\text{Hf}$ | 2 $\sigma$ | $^{176}\text{Lu}/^{177}\text{Hf}$ | 2 $\sigma$ | $^{176}\text{Hf}/^{177}\text{Hf}$ | 2 $\sigma$ | $^{176}\text{Hf}/^{177}\text{Hf}_i$ | $\varepsilon_{\text{Hf}}(0)$ | $\varepsilon_{\text{Hf}}(t)$ | 2 $\sigma$ | T <sub>DM</sub> (Ma) | T <sub>DM</sub> <sup>C</sup> (Ma) | f <sub>Lu/Hf</sub> |
|---------------|-----------------------------------|------------|-----------------------------------|------------|-----------------------------------|------------|-------------------------------------|------------------------------|------------------------------|------------|----------------------|-----------------------------------|--------------------|
| 18T062-6      | 0.027282                          | 0.000183   | 0.000757                          | 0.000003   | 0.282780                          | 0.000028   | 0.282778                            | 0.3                          | 2.7                          | 1.0        | 666                  | 1000                              | -0.98              |
| 18T062-7      | 0.021541                          | 0.000266   | 0.000531                          | 0.000007   | 0.282710                          | 0.000027   | 0.282709                            | -2.2                         | 0.2                          | 1.0        | 759                  | 1156                              | -0.98              |
| 18T062-8      | 0.022969                          | 0.000075   | 0.000621                          | 0.000004   | 0.282708                          | 0.000024   | 0.282707                            | -2.3                         | 0.2                          | 0.8        | 763                  | 1161                              | -0.98              |
| 18T062-9      | 0.018532                          | 0.000133   | 0.000574                          | 0.000001   | 0.282793                          | 0.000023   | 0.282792                            | 0.7                          | 3.2                          | 0.8        | 644                  | 970                               | -0.98              |
| 18T062-10     | 0.034205                          | 0.000273   | 0.000907                          | 0.000010   | 0.282608                          | 0.000027   | 0.282606                            | -5.8                         | -3.4                         | 1.0        | 911                  | 1388                              | -0.97              |
| 18T062-11     | 0.038412                          | 0.000885   | 0.000965                          | 0.000020   | 0.282637                          | 0.000027   | 0.282635                            | -4.8                         | -2.4                         | 0.9        | 870                  | 1322                              | -0.97              |
| 18T062-12     | 0.027681                          | 0.000170   | 0.000658                          | 0.000002   | 0.282723                          | 0.000028   | 0.282722                            | -1.7                         | 0.7                          | 1.0        | 743                  | 1127                              | -0.98              |
| 18T062-13     | 0.029662                          | 0.000194   | 0.000757                          | 0.000003   | 0.282813                          | 0.000037   | 0.282811                            | 1.4                          | 3.8                          | 1.3        | 619                  | 926                               | -0.98              |
| 18T062-14     | 0.022942                          | 0.000161   | 0.000605                          | 0.000002   | 0.282690                          | 0.000031   | 0.282689                            | -2.9                         | -0.5                         | 1.1        | 789                  | 1202                              | -0.98              |
| 18T062-15     | 0.021522                          | 0.000074   | 0.000574                          | 0.000003   | 0.282668                          | 0.000028   | 0.282667                            | -3.7                         | -1.3                         | 1.0        | 819                  | 1251                              | -0.98              |
| <b>18T323</b> |                                   |            |                                   |            |                                   |            |                                     |                              |                              |            |                      |                                   |                    |
| 18T323-1      | 0.024872                          | 0.000213   | 0.000883                          | 0.000008   | 0.282746                          | 0.000020   | 0.282745                            | -0.9                         | 0.8                          | 0.7        | 716                  | 1097                              | -0.97              |
| 18T323-2      | 0.023116                          | 0.000264   | 0.000789                          | 0.000006   | 0.282764                          | 0.000027   | 0.282763                            | -0.3                         | 1.4                          | 0.9        | 688                  | 1055                              | -0.98              |
| 18T323-3      | 0.021412                          | 0.000755   | 0.000769                          | 0.000022   | 0.282723                          | 0.000019   | 0.282721                            | -1.7                         | -0.1                         | 0.7        | 746                  | 1149                              | -0.98              |
| 18T323-4      | 0.022967                          | 0.000625   | 0.000899                          | 0.000016   | 0.282768                          | 0.000024   | 0.282766                            | -0.2                         | 1.5                          | 0.8        | 685                  | 1048                              | -0.97              |
| 18T323-5      | 0.049295                          | 0.001616   | 0.001519                          | 0.000050   | 0.282712                          | 0.000025   | 0.282709                            | -2.1                         | -0.5                         | 0.9        | 777                  | 1176                              | -0.95              |
| 18T323-6      | 0.016352                          | 0.000626   | 0.000533                          | 0.000018   | 0.282482                          | 0.000030   | 0.282482                            | -10.2                        | -8.5                         | 1.1        | 1076                 | 1688                              | -0.98              |
| 18T323-7      | 0.023138                          | 0.000124   | 0.000807                          | 0.000004   | 0.282730                          | 0.000024   | 0.282728                            | -1.5                         | 0.2                          | 0.9        | 737                  | 1133                              | -0.98              |
| 18T323-8      | 0.035794                          | 0.000973   | 0.001163                          | 0.000025   | 0.282738                          | 0.000028   | 0.282737                            | -1.2                         | 0.5                          | 1.0        | 732                  | 1115                              | -0.96              |
| 18T323-9      | 0.040373                          | 0.000633   | 0.001234                          | 0.000017   | 0.282761                          | 0.000028   | 0.282759                            | -0.4                         | 1.3                          | 1.0        | 701                  | 1064                              | -0.96              |
| 18T323-10     | 0.029103                          | 0.000531   | 0.000915                          | 0.000010   | 0.282682                          | 0.000030   | 0.282681                            | -3.2                         | -1.5                         | 1.1        | 806                  | 1241                              | -0.97              |
| 18T323-11     | 0.043972                          | 0.000520   | 0.001286                          | 0.000009   | 0.282770                          | 0.000029   | 0.282768                            | -0.1                         | 1.6                          | 1.0        | 689                  | 1043                              | -0.96              |
| 18T323-12     | 0.082023                          | 0.001087   | 0.002186                          | 0.000021   | 0.282831                          | 0.000031   | 0.282827                            | 2.1                          | 3.7                          | 1.1        | 617                  | 910                               | -0.93              |
| 18T323-13     | 0.041409                          | 0.001301   | 0.001299                          | 0.000045   | 0.282737                          | 0.000028   | 0.282735                            | -1.3                         | 0.4                          | 1.0        | 737                  | 1119                              | -0.96              |
| 18T323-14     | 0.033282                          | 0.000347   | 0.001001                          | 0.000007   | 0.282710                          | 0.000027   | 0.282708                            | -2.2                         | -0.5                         | 0.9        | 769                  | 1178                              | -0.97              |

| Sample        | $^{176}\text{Yb}/^{177}\text{Hf}$ | 2 $\sigma$ | $^{176}\text{Lu}/^{177}\text{Hf}$ | 2 $\sigma$ | $^{176}\text{Hf}/^{177}\text{Hf}$ | 2 $\sigma$ | $^{176}\text{Hf}/^{177}\text{Hf}_i$ | $\varepsilon_{\text{Hf}}(0)$ | $\varepsilon_{\text{Hf}}(t)$ | 2 $\sigma$ | T <sub>DM</sub> (Ma) | T <sub>DM</sub> <sup>C</sup> (Ma) | f <sub>Lu/Hf</sub> |
|---------------|-----------------------------------|------------|-----------------------------------|------------|-----------------------------------|------------|-------------------------------------|------------------------------|------------------------------|------------|----------------------|-----------------------------------|--------------------|
| 18T323-15     | 0.049922                          | 0.001201   | 0.001495                          | 0.000032   | 0.282708                          | 0.000025   | 0.282706                            | -2.3                         | -0.6                         | 0.9        | 781                  | 1184                              | -0.95              |
| <b>18T318</b> |                                   |            |                                   |            |                                   |            |                                     |                              |                              |            |                      |                                   |                    |
| 18T318-1      | 0.027769                          | 0.000152   | 0.001087                          | 0.000010   | 0.282732                          | 0.000019   | 0.282730                            | -1.4                         | 0.3                          | 0.7        | 739                  | 1129                              | -0.97              |
| 18T318-2      | 0.022017                          | 0.000172   | 0.000836                          | 0.000004   | 0.282724                          | 0.000022   | 0.282723                            | -1.7                         | 0.0                          | 0.8        | 745                  | 1145                              | -0.97              |
| 18T318-3      | 0.056715                          | 0.000264   | 0.001813                          | 0.000012   | 0.282745                          | 0.000028   | 0.282742                            | -1.0                         | 0.7                          | 1.0        | 735                  | 1102                              | -0.95              |
| 18T318-4      | 0.062877                          | 0.000626   | 0.002014                          | 0.000024   | 0.282772                          | 0.000027   | 0.282769                            | 0.0                          | 1.7                          | 1.0        | 699                  | 1040                              | -0.94              |
| 18T318-5      | 0.039247                          | 0.000600   | 0.001323                          | 0.000015   | 0.282766                          | 0.000023   | 0.282764                            | -0.2                         | 1.5                          | 0.8        | 696                  | 1053                              | -0.96              |
| 18T318-6      | 0.060360                          | 0.003195   | 0.001936                          | 0.000080   | 0.282769                          | 0.000025   | 0.282766                            | -0.1                         | 1.5                          | 0.9        | 703                  | 1048                              | -0.94              |
| 18T318-7      | 0.044055                          | 0.000995   | 0.001406                          | 0.000018   | 0.282747                          | 0.000023   | 0.282745                            | -0.9                         | 0.8                          | 0.8        | 724                  | 1095                              | -0.96              |
| 18T318-8      | 0.039356                          | 0.000433   | 0.001239                          | 0.000016   | 0.282699                          | 0.000022   | 0.282697                            | -2.6                         | -0.9                         | 0.8        | 789                  | 1203                              | -0.96              |
| 18T318-9      | 0.038583                          | 0.000555   | 0.001215                          | 0.000022   | 0.282728                          | 0.000028   | 0.282727                            | -1.5                         | 0.1                          | 1.0        | 747                  | 1137                              | -0.96              |
| 18T318-10     | 0.033929                          | 0.000778   | 0.001141                          | 0.000014   | 0.282728                          | 0.000024   | 0.282727                            | -1.5                         | 0.2                          | 0.8        | 745                  | 1137                              | -0.97              |
| 18T318-11     | 0.023324                          | 0.000507   | 0.000787                          | 0.000013   | 0.282745                          | 0.000019   | 0.282743                            | -1.0                         | 0.7                          | 0.7        | 716                  | 1099                              | -0.98              |
| 18T318-12     | 0.017512                          | 0.000376   | 0.000638                          | 0.000007   | 0.282739                          | 0.000021   | 0.282738                            | -1.2                         | 0.6                          | 0.7        | 720                  | 1110                              | -0.98              |
| 18T318-13     | 0.044637                          | 0.001197   | 0.001380                          | 0.000028   | 0.282775                          | 0.000026   | 0.282773                            | 0.1                          | 1.8                          | 0.9        | 684                  | 1033                              | -0.96              |
| 18T318-14     | 0.027960                          | 0.000438   | 0.001097                          | 0.000016   | 0.282734                          | 0.000025   | 0.282732                            | -1.3                         | 0.3                          | 0.9        | 737                  | 1124                              | -0.97              |
| 18T318-15     | 0.032705                          | 0.000740   | 0.001020                          | 0.000018   | 0.282723                          | 0.000020   | 0.282722                            | -1.7                         | 0.0                          | 0.7        | 750                  | 1148                              | -0.97              |
| <b>18T039</b> |                                   |            |                                   |            |                                   |            |                                     |                              |                              |            |                      |                                   |                    |
| 18T039-1      | 0.024788                          | 0.000334   | 0.000755                          | 0.000008   | 0.282757                          | 0.000021   | 0.282756                            | -0.5                         | 1.1                          | 0.8        | 697                  | 1072                              | -0.98              |
| 18T039-2      | 0.020284                          | 0.001217   | 0.000583                          | 0.000027   | 0.282716                          | 0.000024   | 0.282715                            | -2.0                         | -0.3                         | 0.8        | 752                  | 1165                              | -0.98              |
| 18T039-3      | 0.035684                          | 0.001066   | 0.001111                          | 0.000027   | 0.282744                          | 0.000023   | 0.282743                            | -1.0                         | 0.7                          | 0.8        | 722                  | 1102                              | -0.97              |
| 18T039-4      | 0.033782                          | 0.000498   | 0.001083                          | 0.000022   | 0.282695                          | 0.000023   | 0.282693                            | -2.7                         | -1.1                         | 0.8        | 792                  | 1215                              | -0.97              |
| 18T039-5      | 0.034082                          | 0.000371   | 0.001077                          | 0.000013   | 0.282780                          | 0.000021   | 0.282779                            | 0.3                          | 1.9                          | 0.8        | 671                  | 1021                              | -0.97              |
| 18T039-6      | 0.032104                          | 0.000429   | 0.001010                          | 0.000006   | 0.282750                          | 0.000021   | 0.282748                            | -0.8                         | 0.8                          | 0.8        | 713                  | 1090                              | -0.97              |
| 18T039-7      | 0.030690                          | 0.000454   | 0.000934                          | 0.000004   | 0.282688                          | 0.000019   | 0.282687                            | -3.0                         | -1.3                         | 0.7        | 798                  | 1228                              | -0.97              |

| Sample        | $^{176}\text{Yb}/^{177}\text{Hf}$ | $2\sigma$ | $^{176}\text{Lu}/^{177}\text{Hf}$ | $2\sigma$ | $^{176}\text{Hf}/^{177}\text{Hf}$ | $2\sigma$ | $^{176}\text{Hf}/^{177}\text{Hf}_i$ | $\varepsilon_{\text{Hf}}(0)$ | $\varepsilon_{\text{Hf}}(t)$ | $2\sigma$ | $T_{\text{DM}}$ (Ma) | $T_{\text{DM}}^{\text{C}}$ (Ma) | $f_{\text{Lu/Hf}}$ |
|---------------|-----------------------------------|-----------|-----------------------------------|-----------|-----------------------------------|-----------|-------------------------------------|------------------------------|------------------------------|-----------|----------------------|---------------------------------|--------------------|
| 18T039-8      | 0.032956                          | 0.000144  | 0.001017                          | 0.000012  | 0.282745                          | 0.000021  | 0.282744                            | -1.0                         | 0.7                          | 0.7       | 719                  | 1100                            | -0.97              |
| 18T039-9      | 0.020141                          | 0.000353  | 0.000647                          | 0.000010  | 0.282771                          | 0.000018  | 0.282770                            | 0.0                          | 1.6                          | 0.6       | 676                  | 1041                            | -0.98              |
| 18T039-10     | 0.028129                          | 0.000425  | 0.000864                          | 0.000005  | 0.282686                          | 0.000022  | 0.282685                            | -3.0                         | -1.4                         | 0.8       | 800                  | 1234                            | -0.97              |
| 18T039-11     | 0.025005                          | 0.000151  | 0.000785                          | 0.000013  | 0.282726                          | 0.000021  | 0.282725                            | -1.6                         | 0.0                          | 0.7       | 741                  | 1142                            | -0.98              |
| 18T039-12     | 0.032088                          | 0.000772  | 0.001002                          | 0.000014  | 0.282757                          | 0.000021  | 0.282755                            | -0.5                         | 1.1                          | 0.7       | 703                  | 1074                            | -0.97              |
| 18T039-13     | 0.046317                          | 0.000461  | 0.001416                          | 0.000023  | 0.282769                          | 0.000019  | 0.282766                            | -0.1                         | 1.5                          | 0.7       | 694                  | 1049                            | -0.96              |
| 18T039-14     | 0.031644                          | 0.000365  | 0.001005                          | 0.000018  | 0.282762                          | 0.000023  | 0.282760                            | -0.4                         | 1.3                          | 0.8       | 696                  | 1063                            | -0.97              |
| 18T039-15     | 0.038054                          | 0.000394  | 0.001208                          | 0.000005  | 0.282778                          | 0.000022  | 0.282776                            | 0.2                          | 1.8                          | 0.8       | 677                  | 1027                            | -0.96              |
| <b>18T045</b> |                                   |           |                                   |           |                                   |           |                                     |                              |                              |           |                      |                                 |                    |
| 18T045-1      | 0.027399                          | 0.000973  | 0.000831                          | 0.000036  | 0.282766                          | 0.000021  | 0.282764                            | -0.2                         | 1.4                          | 0.7       | 687                  | 1054                            | -0.97              |
| 18T045-2      | 0.056259                          | 0.001702  | 0.001709                          | 0.000059  | 0.282765                          | 0.000019  | 0.282762                            | -0.3                         | 1.3                          | 0.7       | 705                  | 1059                            | -0.95              |
| 18T045-3      | 0.027399                          | 0.002288  | 0.000803                          | 0.000053  | 0.282721                          | 0.000020  | 0.282720                            | -1.8                         | -0.2                         | 0.7       | 750                  | 1155                            | -0.98              |
| 18T045-4      | 0.046198                          | 0.002488  | 0.001412                          | 0.000087  | 0.282774                          | 0.000022  | 0.282772                            | 0.1                          | 1.7                          | 0.8       | 686                  | 1038                            | -0.96              |
| 18T045-5      | 0.024513                          | 0.001314  | 0.000772                          | 0.000036  | 0.282776                          | 0.000018  | 0.282775                            | 0.2                          | 1.8                          | 0.6       | 671                  | 1030                            | -0.98              |
| 18T045-6      | 0.026322                          | 0.000855  | 0.000986                          | 0.000037  | 0.282684                          | 0.000030  | 0.282682                            | -3.1                         | -1.5                         | 1.1       | 806                  | 1239                            | -0.97              |
| 18T045-7      | 0.059561                          | 0.002197  | 0.001702                          | 0.000038  | 0.282829                          | 0.000024  | 0.282826                            | 2.0                          | 3.6                          | 0.8       | 612                  | 914                             | -0.95              |
| 18T045-8      | 0.050615                          | 0.001757  | 0.001514                          | 0.000063  | 0.282758                          | 0.000027  | 0.282755                            | -0.5                         | 1.1                          | 0.9       | 711                  | 1074                            | -0.95              |
| 18T045-9      | 0.013507                          | 0.000370  | 0.000436                          | 0.000008  | 0.282686                          | 0.000024  | 0.282685                            | -3.0                         | -1.4                         | 0.8       | 791                  | 1232                            | -0.99              |
| 18T045-10     | 0.028061                          | 0.001415  | 0.000936                          | 0.000047  | 0.282782                          | 0.000023  | 0.282781                            | 0.4                          | 2.0                          | 0.8       | 666                  | 1017                            | -0.97              |
| 18T045-11     | 0.044338                          | 0.001057  | 0.001557                          | 0.000014  | 0.282773                          | 0.000035  | 0.282770                            | 0.0                          | 1.6                          | 1.2       | 690                  | 1040                            | -0.95              |
| 18T045-12     | 0.028224                          | 0.000246  | 0.000848                          | 0.000012  | 0.282763                          | 0.000024  | 0.282762                            | -0.3                         | 1.3                          | 0.8       | 690                  | 1059                            | -0.97              |
| 18T045-13     | 0.032876                          | 0.000788  | 0.001027                          | 0.000030  | 0.282780                          | 0.000023  | 0.282779                            | 0.3                          | 1.9                          | 0.8       | 670                  | 1022                            | -0.97              |
| 18T045-14     | 0.028819                          | 0.000926  | 0.000929                          | 0.000025  | 0.282724                          | 0.000024  | 0.282723                            | -1.7                         | -0.1                         | 0.8       | 747                  | 1148                            | -0.97              |
| <b>18T048</b> |                                   |           |                                   |           |                                   |           |                                     |                              |                              |           |                      |                                 |                    |
| 18T048-1      | 0.046746                          | 0.000445  | 0.001306                          | 0.000015  | 0.282754                          | 0.000022  | 0.282752                            | -0.6                         | 1.0                          | 0.8       | 712                  | 1081                            | -0.96              |

| Sample    | $^{176}\text{Yb}/^{177}\text{Hf}$ | $2\sigma$ | $^{176}\text{Lu}/^{177}\text{Hf}$ | $2\sigma$ | $^{176}\text{Hf}/^{177}\text{Hf}$ | $2\sigma$ | $^{176}\text{Hf}/^{177}\text{Hf}$ | $\varepsilon_{\text{Hf}}(0)$ | $\varepsilon_{\text{Hf}}(t)$ | $2\sigma$ | $T_{\text{DM}} \text{ (Ma)}$ | $T_{\text{DM}}^{\text{C}} \text{ (Ma)}$ | $f_{\text{Lu/Hf}}$ |
|-----------|-----------------------------------|-----------|-----------------------------------|-----------|-----------------------------------|-----------|-----------------------------------|------------------------------|------------------------------|-----------|------------------------------|-----------------------------------------|--------------------|
| 18T048-2  | 0.030727                          | 0.000196  | 0.000896                          | 0.000009  | 0.282748                          | 0.000021  | 0.282747                          | -0.8                         | 0.8                          | 0.7       | 712                          | 1092                                    | -0.97              |
| 18T048-3  | 0.042168                          | 0.000805  | 0.001261                          | 0.000019  | 0.282782                          | 0.000021  | 0.282780                          | 0.3                          | 2.0                          | 0.8       | 672                          | 1018                                    | -0.96              |
| 18T048-4  | 0.038922                          | 0.000453  | 0.001110                          | 0.000004  | 0.282774                          | 0.000024  | 0.282773                          | 0.1                          | 1.7                          | 0.9       | 680                          | 1034                                    | -0.97              |
| 18T048-5  | 0.027877                          | 0.000282  | 0.000803                          | 0.000003  | 0.282766                          | 0.000020  | 0.282765                          | -0.2                         | 1.5                          | 0.7       | 686                          | 1052                                    | -0.98              |
| 18T048-6  | 0.051191                          | 0.001039  | 0.001442                          | 0.000028  | 0.282763                          | 0.000019  | 0.282761                          | -0.3                         | 1.3                          | 0.7       | 702                          | 1061                                    | -0.96              |
| 18T048-7  | 0.029111                          | 0.000530  | 0.000891                          | 0.000012  | 0.282764                          | 0.000018  | 0.282763                          | -0.3                         | 1.4                          | 0.6       | 690                          | 1056                                    | -0.97              |
| 18T048-8  | 0.041639                          | 0.000483  | 0.001230                          | 0.000014  | 0.282738                          | 0.000022  | 0.282736                          | -1.2                         | 0.4                          | 0.8       | 734                          | 1116                                    | -0.96              |
| 18T048-9  | 0.039446                          | 0.000360  | 0.001092                          | 0.000004  | 0.282726                          | 0.000025  | 0.282724                          | -1.6                         | 0.0                          | 0.9       | 748                          | 1143                                    | -0.97              |
| 18T048-10 | 0.044193                          | 0.000705  | 0.001200                          | 0.000013  | 0.282725                          | 0.000023  | 0.282723                          | -1.7                         | 0.0                          | 0.8       | 752                          | 1146                                    | -0.96              |
| 18T048-11 | 0.038509                          | 0.000645  | 0.001096                          | 0.000008  | 0.282766                          | 0.000022  | 0.282764                          | -0.2                         | 1.4                          | 0.8       | 692                          | 1054                                    | -0.97              |
| 18T048-12 | 0.027558                          | 0.000349  | 0.000844                          | 0.000007  | 0.282743                          | 0.000021  | 0.282741                          | -1.0                         | 0.6                          | 0.7       | 719                          | 1105                                    | -0.97              |
| 18T048-13 | 0.034668                          | 0.000533  | 0.000947                          | 0.000009  | 0.282768                          | 0.000024  | 0.282767                          | -0.1                         | 1.5                          | 0.9       | 685                          | 1047                                    | -0.97              |
| 18T048-14 | 0.067761                          | 0.001515  | 0.001723                          | 0.000023  | 0.282825                          | 0.000029  | 0.282822                          | 1.9                          | 3.5                          | 1.0       | 618                          | 922                                     | -0.95              |
| 18T048-15 | 0.064861                          | 0.000304  | 0.001825                          | 0.000021  | 0.282763                          | 0.000025  | 0.282760                          | -0.3                         | 1.3                          | 0.9       | 709                          | 1062                                    | -0.95              |

## Supplemental Table S3

### Part A

#### A brief checklist of the geochemical samples

| Location | GPS                  | Lithology             | Geochemical sample     |
|----------|----------------------|-----------------------|------------------------|
| Tarenben | N32.1815°, E89.6554° | Andesite              | 18T074-080; 19T931-932 |
| Tarenben | N32.1790°, E89.6548° | Rhyolite              | 19T921-930             |
| Maqian   | N31.8088°, E90.1298° | Granite               | 18T309-314             |
| Maqian   | N31.7895°, E90.1473° | Andesite              | 18T297-300             |
| Maqian   | N31.6678°, E90.0061° | Granodiorite porphyry | 19T016-018             |
| Daru Tso | N31.5891°, E90.8110° | Diorite               | 19T008-015             |
| Beila    | N31.4106°, E91.0744° | Andesite              | 19T163-167             |
| Baingoin | N31.4307°, E89.8032° | Granite               | 18T062-067             |
| Baingoin | N31.2357°, E89.7764° | Granite               | 18T318-322             |
| Baingoin | N31.2292°, E89.7809° | Granite               | 18T323-328             |
| Yongzhu  | N31.3359°, E89.2150° | Granodiorite          | 18T039-044             |
| Yongzhu  | N31.3359°, E89.2150° | Diorite enclave       | 18T045-047             |
| Yongzhu  | N31.3125°, E89.2700° | Granodiorite          | 18T048-051             |

## Part B

### Whole-rock major (wt. %) and trace (ppm) element data of the Cretaceous rocks sampled across the Bangong-Nujiang suture zone

| Sample                           | 18T074 | 18T075 | 18T076 | 18T077 | 18T078 | 18T079 | 18T080 | 19T931 | 19T932 |
|----------------------------------|--------|--------|--------|--------|--------|--------|--------|--------|--------|
| SiO <sub>2</sub>                 | 59.69  | 63.59  | 52.54  | 64.19  | 60.64  | 58.98  | 56.24  | 58.15  | 62.81  |
| TiO <sub>2</sub>                 | 0.49   | 0.63   | 0.54   | 0.63   | 0.62   | 0.57   | 0.61   | 0.66   | 0.53   |
| Al <sub>2</sub> O <sub>3</sub>   | 13.26  | 16.71  | 14.01  | 16.82  | 16.53  | 15.04  | 15.74  | 17.20  | 16.61  |
| Fe <sub>2</sub> O <sub>3</sub> T | 5.56   | 4.72   | 5.12   | 4.39   | 4.80   | 5.31   | 5.41   | 5.42   | 4.47   |
| MnO                              | 0.14   | 0.04   | 0.19   | 0.03   | 0.07   | 0.09   | 0.10   | 0.09   | 0.06   |
| MgO                              | 3.22   | 1.28   | 1.86   | 1.18   | 1.85   | 1.25   | 1.26   | 2.45   | 1.70   |
| CaO                              | 6.51   | 3.74   | 11.60  | 3.54   | 4.45   | 7.47   | 8.48   | 4.88   | 2.90   |
| Na <sub>2</sub> O                | 2.47   | 4.43   | 2.97   | 4.44   | 4.56   | 3.29   | 3.73   | 3.52   | 4.16   |
| K <sub>2</sub> O                 | 1.72   | 2.17   | 2.19   | 2.13   | 2.03   | 2.62   | 2.43   | 2.90   | 2.98   |
| P <sub>2</sub> O <sub>5</sub>    | 0.13   | 0.19   | 0.17   | 0.20   | 0.19   | 0.18   | 0.20   | 0.21   | 0.16   |
| LOI                              | 7.40   | 3.07   | 9.64   | 2.89   | 4.52   | 5.42   | 6.23   | 3.72   | 2.87   |
| Li                               | 16.53  | 22.63  | 21.67  | 21.64  | 24.48  | 15.19  | 16.07  | 31.80  | 34.00  |
| Be                               | 1.06   | 1.59   | 1.31   | 1.62   | 1.60   | 1.40   | 1.36   | 1.94   | 1.70   |
| Sc                               | 16.60  | 12.79  | 12.54  | 12.46  | 13.89  | 12.81  | 13.62  | 12.01  | 9.82   |
| Ti                               | 2947   | 3704   | 3219   | 3895   | 4039   | 3484   | 3713   | 3878   | 2956   |
| V                                | 109.7  | 97.5   | 94.8   | 140.0  | 140.9  | 103.1  | 103.4  | 125.4  | 93.2   |
| Cr                               | 206.88 | 30.95  | 30.76  | 35.71  | 35.98  | 32.00  | 32.64  | 31.79  | 49.29  |
| Mn                               | 1106   | 305    | 1563   | 250    | 545    | 713    | 851    | 678    | 453    |
| Co                               | 18.98  | 16.77  | 18.98  | 18.14  | 19.02  | 17.43  | 17.66  | 16.43  | 9.33   |
| Ni                               | 46.01  | 17.14  | 21.43  | 20.61  | 21.29  | 18.98  | 18.03  | 18.55  | 24.79  |
| Cu                               | 42.96  | 27.25  | 25.60  | 29.25  | 28.39  | 23.19  | 25.37  | 17.35  | 15.96  |
| Zn                               | 48.29  | 48.56  | 48.38  | 48.24  | 47.58  | 50.50  | 49.88  | 51.73  | 49.21  |
| Ga                               | 14.45  | 16.93  | 16.08  | 17.82  | 18.23  | 17.23  | 17.73  | 16.86  | 14.54  |
| Rb                               | 46.05  | 85.73  | 67.81  | 91.12  | 82.09  | 82.19  | 81.13  | 121.86 | 113.45 |
| Sr                               | 372    | 472    | 384    | 473    | 524    | 389    | 427    | 385    | 375    |
| Y                                | 15.77  | 14.36  | 16.44  | 14.97  | 16.87  | 16.98  | 16.30  | 16.22  | 14.53  |
| Zr                               | 108    | 153    | 136    | 167    | 171    | 153    | 149    | 163    | 161    |
| Nb                               | 7.51   | 11.59  | 10.02  | 12.20  | 12.53  | 10.73  | 11.25  | 9.36   | 8.55   |
| Sn                               | 1.45   | 1.17   | 1.22   | 1.22   | 1.22   | 1.53   | 0.98   | 1.63   | 1.48   |
| Cs                               | 1.26   | 3.32   | 2.10   | 3.66   | 4.22   | 2.68   | 2.81   | 3.43   | 3.31   |
| Ba                               | 561    | 867    | 442    | 748    | 965    | 554    | 547    | 601    | 976    |
| La                               | 23.60  | 32.62  | 32.65  | 33.43  | 33.76  | 30.24  | 33.17  | 39.44  | 29.33  |
| Ce                               | 40.38  | 52.83  | 55.10  | 56.48  | 58.45  | 52.96  | 56.97  | 70.45  | 52.78  |
| Pr                               | 4.64   | 6.01   | 6.26   | 6.27   | 6.50   | 5.94   | 6.57   | 6.98   | 5.37   |
| Nd                               | 16.41  | 20.43  | 21.46  | 21.33  | 22.24  | 20.64  | 22.53  | 23.88  | 18.35  |
| Sm                               | 3.21   | 3.52   | 3.75   | 3.63   | 3.93   | 3.78   | 4.06   | 4.31   | 3.41   |
| Eu                               | 0.90   | 1.03   | 1.01   | 1.04   | 1.17   | 1.05   | 1.14   | 1.08   | 0.85   |
| Gd                               | 3.26   | 3.45   | 3.69   | 3.53   | 3.91   | 3.77   | 3.96   | 3.43   | 2.98   |
| Tb                               | 0.49   | 0.48   | 0.53   | 0.50   | 0.56   | 0.54   | 0.57   | 0.53   | 0.45   |
| Dy                               | 2.88   | 2.69   | 3.07   | 2.87   | 3.19   | 3.16   | 3.18   | 3.05   | 2.60   |
| Ho                               | 0.65   | 0.59   | 0.66   | 0.64   | 0.70   | 0.69   | 0.68   | 0.61   | 0.54   |
| Er                               | 1.63   | 1.47   | 1.68   | 1.59   | 1.72   | 1.73   | 1.71   | 1.77   | 1.57   |
| Tm                               | 0.27   | 0.25   | 0.28   | 0.27   | 0.29   | 0.28   | 0.28   | 0.28   | 0.25   |
| Yb                               | 1.80   | 1.55   | 1.87   | 1.80   | 1.91   | 1.87   | 1.79   | 1.79   | 1.59   |
| Lu                               | 0.24   | 0.22   | 0.26   | 0.26   | 0.26   | 0.27   | 0.25   | 0.29   | 0.27   |
| Hf                               | 2.88   | 3.82   | 3.44   | 4.24   | 4.42   | 3.75   | 3.81   | 4.08   | 4.06   |
| Ta                               | 0.48   | 0.66   | 0.59   | 0.72   | 0.72   | 0.62   | 0.66   | 0.65   | 0.64   |
| Pb                               | 12.62  | 14.30  | 12.31  | 13.83  | 12.38  | 14.22  | 14.44  | 14.83  | 20.20  |
| Th                               | 12.32  | 20.25  | 17.72  | 21.56  | 22.37  | 19.10  | 20.41  | 20.10  | 18.85  |
| U                                | 2.67   | 2.64   | 3.13   | 2.75   | 2.54   | 3.75   | 3.60   | 2.54   | 3.10   |

| Sample                           | 19T921 | 19T922 | 19T923 | 19T924 | 19T925 | 19T926 | 19T927 | 19T928 | 19T929 |
|----------------------------------|--------|--------|--------|--------|--------|--------|--------|--------|--------|
| SiO <sub>2</sub>                 | 74.65  | 74.47  | 73.95  | 73.97  | 73.71  | 75.41  | 73.48  | 75.42  | 73.28  |
| TiO <sub>2</sub>                 | 0.15   | 0.15   | 0.16   | 0.15   | 0.15   | 0.15   | 0.14   | 0.15   | 0.25   |
| Al <sub>2</sub> O <sub>3</sub>   | 12.95  | 12.40  | 13.02  | 12.94  | 13.02  | 12.09  | 12.04  | 12.10  | 13.11  |
| Fe <sub>2</sub> O <sub>3</sub> T | 1.45   | 1.93   | 1.92   | 1.94   | 1.94   | 2.16   | 1.70   | 1.90   | 2.70   |
| MnO                              | 0.02   | 0.07   | 0.05   | 0.05   | 0.05   | 0.06   | 0.05   | 0.04   | 0.05   |
| MgO                              | 1.23   | 1.06   | 1.61   | 1.17   | 1.83   | 0.55   | 1.74   | 2.11   | 0.93   |
| CaO                              | 0.35   | 0.44   | 0.29   | 0.38   | 0.29   | 1.05   | 1.35   | 0.34   | 0.88   |
| Na <sub>2</sub> O                | 2.50   | 2.68   | 2.30   | 2.56   | 2.41   | 2.82   | 1.98   | 2.04   | 2.87   |
| K <sub>2</sub> O                 | 4.93   | 4.74   | 4.61   | 4.97   | 4.24   | 4.23   | 4.37   | 2.99   | 3.13   |
| P <sub>2</sub> O <sub>5</sub>    | 0.05   | 0.05   | 0.05   | 0.05   | 0.06   | 0.03   | 0.05   | 0.05   | 0.09   |
| LOI                              | 1.55   | 1.30   | 1.65   | 1.31   | 1.80   | 0.68   | 2.76   | 2.55   | 1.98   |
| Li                               | 37.43  | 33.24  | 45.93  | 35.46  | 48.25  | 26.25  | 46.90  | 54.44  | 32.78  |
| Be                               | 1.87   | 1.92   | 2.04   | 1.93   | 1.94   | 2.00   | 1.08   | 2.01   | 1.53   |
| Sc                               | 2.46   | 2.44   | 2.60   | 2.62   | 2.70   | 2.06   | 2.05   | 2.34   | 2.32   |
| Ti                               | 773    | 808    | 868    | 826    | 861    | 818    | 782    | 821    | 1460   |
| V                                | 8.1    | 10.4   | 8.1    | 7.7    | 12.7   | 24.4   | 8.1    | 11.5   | 22.3   |
| Cr                               | 5.89   | 13.30  | 7.69   | 10.41  | 8.01   | 12.49  | 17.39  | 165.40 | 14.11  |
| Mn                               | 131    | 497    | 361    | 386    | 349    | 414    | 394    | 333    | 415    |
| Co                               | 2.72   | 2.90   | 2.98   | 3.10   | 2.95   | 2.28   | 3.95   | 4.79   | 3.35   |
| Ni                               | 28.31  | 30.57  | 33.45  | 29.30  | 34.48  | 30.71  | 89.78  | 143.11 | 13.27  |
| Cu                               | 2.18   | 8.11   | 5.33   | 6.84   | 6.49   | 17.66  | 11.23  | 13.35  | 5.39   |
| Zn                               | 11.88  | 11.84  | 14.07  | 12.29  | 23.93  | 14.99  | 8.38   | 18.71  | 27.59  |
| Ga                               | 10.91  | 9.88   | 11.67  | 11.23  | 11.89  | 10.38  | 10.21  | 10.58  | 9.23   |
| Rb                               | 190.32 | 162.38 | 176.14 | 179.85 | 141.89 | 183.07 | 160.76 | 98.76  | 92.00  |
| Sr                               | 121    | 101    | 110    | 125    | 107    | 166    | 110    | 72     | 216    |
| Y                                | 8.50   | 10.04  | 10.24  | 8.39   | 9.76   | 7.01   | 8.96   | 8.28   | 8.98   |
| Zr                               | 110    | 84     | 96     | 100    | 76     | 72     | 78     | 101    | 164    |
| Nb                               | 11.59  | 11.63  | 11.79  | 11.55  | 11.89  | 10.63  | 10.91  | 11.10  | 9.12   |
| Sn                               | 1.81   | 2.21   | 2.06   | 2.01   | 1.95   | 2.06   | 1.99   | 2.15   | 1.23   |
| Cs                               | 7.45   | 5.04   | 6.67   | 7.28   | 5.26   | 7.37   | 6.66   | 4.07   | 2.14   |
| Ba                               | 822    | 680    | 754    | 823    | 693    | 743    | 881    | 612    | 1377   |
| La                               | 21.87  | 23.59  | 21.95  | 21.11  | 23.80  | 23.63  | 21.46  | 26.66  | 30.94  |
| Ce                               | 37.98  | 39.07  | 37.53  | 37.41  | 41.58  | 39.96  | 37.65  | 46.31  | 54.97  |
| Pr                               | 3.82   | 4.23   | 3.83   | 3.82   | 4.13   | 4.02   | 3.85   | 4.46   | 5.20   |
| Nd                               | 12.77  | 13.38  | 12.73  | 12.22  | 13.69  | 12.38  | 12.72  | 14.62  | 16.49  |
| Sm                               | 2.26   | 2.42   | 2.32   | 2.29   | 2.45   | 1.96   | 2.29   | 2.50   | 2.70   |
| Eu                               | 0.51   | 0.50   | 0.54   | 0.49   | 0.58   | 0.53   | 0.47   | 0.55   | 0.45   |
| Gd                               | 1.38   | 2.01   | 1.84   | 1.76   | 2.01   | 1.47   | 1.95   | 1.96   | 2.06   |
| Tb                               | 0.26   | 0.31   | 0.31   | 0.30   | 0.30   | 0.21   | 0.29   | 0.28   | 0.27   |
| Dy                               | 1.42   | 1.74   | 1.86   | 1.62   | 1.79   | 1.23   | 1.62   | 1.52   | 1.58   |
| Ho                               | 0.29   | 0.35   | 0.38   | 0.32   | 0.36   | 0.24   | 0.32   | 0.31   | 0.32   |
| Er                               | 0.89   | 1.05   | 1.12   | 0.93   | 1.05   | 0.66   | 0.92   | 0.91   | 0.99   |
| Tm                               | 0.15   | 0.16   | 0.18   | 0.16   | 0.17   | 0.11   | 0.15   | 0.14   | 0.15   |
| Yb                               | 1.00   | 1.12   | 1.17   | 1.02   | 1.10   | 0.69   | 0.95   | 0.99   | 1.03   |
| Lu                               | 0.17   | 0.18   | 0.19   | 0.17   | 0.18   | 0.11   | 0.17   | 0.16   | 0.18   |
| Hf                               | 3.60   | 2.99   | 3.12   | 3.15   | 2.65   | 2.53   | 2.62   | 3.15   | 4.15   |
| Ta                               | 1.23   | 1.13   | 1.23   | 1.17   | 1.19   | 1.06   | 1.09   | 1.10   | 0.77   |
| Pb                               | 17.25  | 12.94  | 15.34  | 17.38  | 13.41  | 27.71  | 14.21  | 6.93   | 12.35  |
| Th                               | 18.81  | 20.01  | 18.72  | 18.78  | 19.37  | 18.94  | 18.19  | 20.75  | 22.87  |
| U                                | 7.33   | 4.60   | 3.30   | 4.64   | 3.73   | 4.03   | 5.40   | 3.67   | 3.60   |

| Sample                           | 19T930 | 18T309 | 18T310 | 18T311 | 18T312 | 18T313 | 18T314 | 18T297 | 18T298 |
|----------------------------------|--------|--------|--------|--------|--------|--------|--------|--------|--------|
| SiO <sub>2</sub>                 | 74.02  | 76.78  | 79.74  | 81.19  | 80.68  | 82.11  | 79.45  | 63.05  | 64.50  |
| TiO <sub>2</sub>                 | 0.27   | 0.13   | 0.12   | 0.12   | 0.11   | 0.11   | 0.12   | 0.64   | 0.66   |
| Al <sub>2</sub> O <sub>3</sub>   | 13.24  | 13.08  | 11.97  | 11.42  | 11.50  | 10.79  | 12.12  | 15.59  | 15.89  |
| Fe <sub>2</sub> O <sub>3</sub> T | 2.35   | 1.08   | 0.48   | 0.40   | 0.35   | 0.35   | 0.40   | 4.98   | 3.07   |
| MnO                              | 0.05   | 0.01   | 0.01   | 0.01   | 0.01   | 0.00   | 0.01   | 0.06   | 0.04   |
| MgO                              | 0.46   | 0.20   | 0.14   | 0.10   | 0.08   | 0.14   | 0.14   | 2.86   | 2.75   |
| CaO                              | 1.85   | 0.43   | 0.16   | 0.50   | 0.72   | 0.24   | 0.17   | 4.53   | 5.20   |
| Na <sub>2</sub> O                | 3.19   | 2.73   | 2.29   | 5.36   | 5.71   | 1.51   | 2.34   | 3.42   | 5.95   |
| K <sub>2</sub> O                 | 2.61   | 4.95   | 5.05   | 0.60   | 0.44   | 4.40   | 4.96   | 3.50   | 0.57   |
| P <sub>2</sub> O <sub>5</sub>    | 0.10   | 0.02   | 0.02   | 0.02   | 0.02   | 0.02   | 0.02   | 0.15   | 0.15   |
| LOI                              | 1.04   | 1.50   | 1.00   | 0.85   | 1.02   | 1.25   | 1.12   | 1.33   | 1.59   |
| Li                               | 22.26  | 4.54   | 6.53   | 9.63   | 11.30  | 14.24  | 5.37   | 22.05  | 10.58  |
| Be                               | 2.06   | 1.99   | 1.25   | 1.37   | 1.28   | 1.28   | 1.26   | 2.17   | 2.33   |
| Sc                               | 1.90   | 4.9    | 3.7    | 2.1    | 4.4    | 2.2    | 3.6    | 14.6   | 12.4   |
| Ti                               | 1538   | 769    | 616    | 537    | 505    | 533    | 618    | 3964   | 3974   |
| V                                | 29.8   | 8.8    | 11.1   | 8.78   | 4.55   | 11.7   | 10.6   | 120    | 120    |
| Cr                               | 13.41  | 11.8   | 5.19   | 4.47   | 3.90   | 8.77   | 5.55   | 18.11  | 20.27  |
| Mn                               | 387    | 73.3   | 56.6   | 27.1   | 37.0   | 15.7   | 24.4   | 483    | 338    |
| Co                               | 2.99   | 0.53   | 0.54   | 0.83   | 0.82   | 0.41   | 0.49   | 14.12  | 11.23  |
| Ni                               | 9.94   | 4.64   | 1.44   | 1.36   | 1.02   | 2.62   | 1.72   | 9.22   | 15.54  |
| Cu                               | 8.42   | 2.63   | 13.45  | 6.99   | 11.71  | 5.83   | 2.57   | 11.99  | 5.87   |
| Zn                               | 28.24  | 21.78  | 8.07   | 4.06   | 3.22   | 9.44   | 7.16   | 33.14  | 19.77  |
| Ga                               | 11.69  | 15.1   | 12.3   | 8.8    | 12.9   | 10.5   | 12.5   | 19.1   | 19.1   |
| Rb                               | 84.04  | 268    | 214    | 29     | 20     | 195    | 215    | 118    | 27.62  |
| Sr                               | 290    | 21     | 14     | 34     | 52     | 17     | 13     | 322    | 368    |
| Y                                | 8.48   | 40.0   | 26.5   | 13.3   | 24.0   | 25.6   | 24.7   | 26.8   | 27.1   |
| Zr                               | 122    | 183    | 159    | 143    | 138    | 136    | 143    | 218    | 246    |
| Nb                               | 9.19   | 22.9   | 14.8   | 13.4   | 12.4   | 12.8   | 14.3   | 12.9   | 13.2   |
| Sn                               | 1.72   | 4.10   | 2.88   | 5.44   | 4.49   | 2.78   | 2.85   | 2.45   | 5.26   |
| Cs                               | 2.66   | 2.63   | 2.69   | 0.88   | 0.69   | 2.87   | 2.87   | 2.34   | 1.74   |
| Ba                               | 993    | 144    | 199    | 16     | 30     | 129    | 154    | 694    | 131    |
| La                               | 30.19  | 45.9   | 40.9   | 19.0   | 28.3   | 31.8   | 36.1   | 48.2   | 20.8   |
| Ce                               | 51.44  | 95.8   | 81.5   | 42.5   | 56.0   | 68.6   | 74.4   | 90.0   | 50.9   |
| Pr                               | 4.92   | 10.74  | 9.13   | 4.18   | 6.43   | 7.11   | 8.23   | 10.37  | 7.20   |
| Nd                               | 15.54  | 36.7   | 30.8   | 14.3   | 22.0   | 24.7   | 28.1   | 35.9   | 28.2   |
| Sm                               | 2.43   | 6.58   | 5.78   | 2.77   | 4.29   | 4.87   | 5.34   | 6.44   | 5.81   |
| Eu                               | 0.52   | 0.18   | 0.23   | 0.12   | 0.18   | 0.20   | 0.21   | 1.39   | 1.06   |
| Gd                               | 1.86   | 6.49   | 5.35   | 2.78   | 4.11   | 4.78   | 4.95   | 6.08   | 5.29   |
| Tb                               | 0.27   | 1.04   | 0.84   | 0.44   | 0.67   | 0.80   | 0.77   | 0.89   | 0.85   |
| Dy                               | 1.50   | 6.75   | 4.91   | 2.55   | 4.11   | 4.83   | 4.57   | 4.97   | 4.89   |
| Ho                               | 0.29   | 1.41   | 1.10   | 0.54   | 0.95   | 1.08   | 1.00   | 1.10   | 1.08   |
| Er                               | 0.89   | 3.93   | 2.77   | 1.34   | 2.39   | 2.62   | 2.55   | 2.76   | 2.75   |
| Tm                               | 0.13   | 0.61   | 0.47   | 0.22   | 0.42   | 0.42   | 0.43   | 0.47   | 0.47   |
| Yb                               | 0.96   | 3.62   | 2.98   | 1.37   | 2.78   | 2.53   | 2.64   | 3.05   | 3.06   |
| Lu                               | 0.16   | 0.52   | 0.39   | 0.17   | 0.38   | 0.33   | 0.36   | 0.41   | 0.43   |
| Hf                               | 3.23   | 6.29   | 5.77   | 5.19   | 5.07   | 4.68   | 4.87   | 5.79   | 6.37   |
| Ta                               | 0.74   | 1.93   | 1.63   | 1.32   | 1.29   | 1.21   | 1.33   | 1.16   | 1.21   |
| Pb                               | 14.48  | 4.48   | 7.27   | 2.32   | 2.73   | 6.13   | 13.28  | 9.72   | 5.99   |
| Th                               | 22.19  | 49.02  | 30.42  | 31.29  | 39.96  | 37.88  | 27.96  | 33.47  | 34.74  |
| U                                | 3.86   | 3.49   | 4.24   | 3.47   | 3.22   | 3.07   | 2.94   | 4.71   | 4.17   |



| Sample                           | 18T299 | 18T300 | 19T016 | 19T017 | 19T018 | 19T008 | 19T009 | 19T010 | 19T011 |
|----------------------------------|--------|--------|--------|--------|--------|--------|--------|--------|--------|
| SiO <sub>2</sub>                 | 64.00  | 63.45  | 64.69  | 64.75  | 64.03  | 56.45  | 56.52  | 56.15  | 56.52  |
| TiO <sub>2</sub>                 | 0.65   | 0.62   | 0.63   | 0.64   | 0.62   | 0.81   | 0.81   | 0.82   | 0.81   |
| Al <sub>2</sub> O <sub>3</sub>   | 15.74  | 15.54  | 16.64  | 16.65  | 16.36  | 17.09  | 16.93  | 16.89  | 16.90  |
| Fe <sub>2</sub> O <sub>3</sub> T | 3.65   | 4.92   | 5.19   | 5.23   | 4.93   | 7.95   | 7.82   | 7.82   | 7.90   |
| MnO                              | 0.05   | 0.06   | 0.05   | 0.05   | 0.05   | 0.12   | 0.12   | 0.12   | 0.12   |
| MgO                              | 2.78   | 2.76   | 1.98   | 1.99   | 1.91   | 4.14   | 4.01   | 3.98   | 4.01   |
| CaO                              | 5.36   | 4.89   | 2.58   | 2.81   | 3.47   | 7.49   | 7.35   | 7.35   | 7.36   |
| Na <sub>2</sub> O                | 5.36   | 2.97   | 3.75   | 3.78   | 3.74   | 2.67   | 2.70   | 2.68   | 2.71   |
| K <sub>2</sub> O                 | 1.05   | 3.72   | 2.12   | 2.04   | 2.03   | 1.86   | 1.92   | 1.91   | 1.91   |
| P <sub>2</sub> O <sub>5</sub>    | 0.16   | 0.15   | 0.19   | 0.19   | 0.19   | 0.16   | 0.16   | 0.16   | 0.16   |
| LOI                              | 1.69   | 1.12   | 1.80   | 2.01   | 2.36   | 1.36   | 1.41   | 1.47   | 1.39   |
| Li                               | 8.85   | 9.04   | 29.4   | 27.9   | 23.2   | 18.1   | 17.2   | 17.3   | 17.0   |
| Be                               | 2.26   | 2.12   | 2.03   | 2.28   | 2.07   | 1.65   | 1.76   | 1.67   | 1.60   |
| Sc                               | 13.98  | 14.52  | 10.3   | 10.5   | 10.3   | 23.9   | 23.1   | 23.0   | 22.7   |
| Ti                               | 3867   | 3857   |        |        |        |        |        |        |        |
| V                                | 123    | 124    | 96.3   | 97.6   | 93.0   | 202    | 203    | 200    | 199    |
| Cr                               | 16.26  | 20.27  | 16.6   | 16.9   | 16.7   | 9.8    | 9.6    | 10.0   | 9.6    |
| Mn                               | 385    | 437    |        |        |        |        |        |        |        |
| Co                               | 14.02  | 15.12  | 5.88   | 6.99   | 6.19   | 20.8   | 20.3   | 19.9   | 20.0   |
| Ni                               | 10.66  | 9.94   | 8.65   | 8.94   | 8.78   | 3.09   | 3.59   | 3.22   | 3.68   |
| Cu                               | 4.83   | 11.51  | 13.50  | 14.55  | 11.89  | 10.3   | 10.7   | 10.5   | 10.3   |
| Zn                               | 18.67  | 22.62  | 40.05  | 43.13  | 43.47  | 74.3   | 75.8   | 72.9   | 72.8   |
| Ga                               | 18.66  | 19.29  | 20.6   | 20.8   | 20.4   | 19.1   | 19.2   | 18.5   | 18.6   |
| Rb                               | 46.34  | 140    | 77     | 76     | 74     | 84.0   | 87.0   | 85.6   | 84.9   |
| Sr                               | 364    | 336    | 476    | 495    | 487    | 298    | 298    | 291    | 288    |
| Y                                | 26.77  | 26.84  | 22.4   | 21.5   | 19.1   | 24.9   | 25.9   | 25.2   | 24.9   |
| Zr                               | 232    | 229    | 167    | 162    | 164    | 140    | 143    | 142    | 140    |
| Nb                               | 12.97  | 12.70  | 10.8   | 11.0   | 10.6   | 7.7    | 8.2    | 8.0    | 7.9    |
| Sn                               | 2.56   | 2.68   | 1.25   | 1.12   | 1.16   | 1.88   | 2.02   | 1.96   | 1.89   |
| Cs                               | 1.92   | 4.12   | 4.80   | 5.73   | 4.35   | 4.07   | 4.39   | 4.29   | 4.18   |
| Ba                               | 258    | 710    | 399    | 386    | 370    | 327    | 339    | 325    | 328    |
| La                               | 40.8   | 49.5   | 40.5   | 36.8   | 30.7   | 27.6   | 28.6   | 28.1   | 27.9   |
| Ce                               | 82.8   | 93.8   | 79.9   | 73.0   | 60.4   | 56.1   | 58.7   | 56.4   | 56.5   |
| Pr                               | 10.0   | 10.6   | 8.91   | 8.25   | 6.75   | 6.31   | 6.58   | 6.39   | 6.28   |
| Nd                               | 35.7   | 36.5   | 33.8   | 31.4   | 26.0   | 24.0   | 24.0   | 24.2   | 23.7   |
| Sm                               | 6.75   | 6.56   | 6.50   | 5.97   | 5.10   | 4.85   | 5.11   | 4.82   | 4.92   |
| Eu                               | 1.16   | 1.35   | 1.33   | 1.28   | 1.31   | 1.18   | 1.21   | 1.15   | 1.14   |
| Gd                               | 6.05   | 6.31   | 5.18   | 4.79   | 4.21   | 4.36   | 4.35   | 4.41   | 4.39   |
| Tb                               | 0.89   | 0.90   | 0.70   | 0.71   | 0.61   | 0.75   | 0.74   | 0.72   | 0.72   |
| Dy                               | 5.02   | 4.97   | 3.86   | 3.93   | 3.49   | 4.18   | 4.26   | 4.30   | 4.31   |
| Ho                               | 1.10   | 1.08   | 0.76   | 0.76   | 0.64   | 0.90   | 0.91   | 0.89   | 0.83   |
| Er                               | 2.68   | 2.74   | 2.12   | 2.02   | 1.81   | 2.53   | 2.60   | 2.58   | 2.54   |
| Tm                               | 0.46   | 0.47   | 0.29   | 0.28   | 0.26   | 0.37   | 0.38   | 0.37   | 0.37   |
| Yb                               | 3.00   | 3.01   | 1.97   | 1.93   | 1.72   | 2.44   | 2.52   | 2.47   | 2.53   |
| Lu                               | 0.40   | 0.40   | 0.30   | 0.28   | 0.26   | 0.38   | 0.37   | 0.37   | 0.37   |
| Hf                               | 6.09   | 6.05   | 4.51   | 4.28   | 4.24   | 3.74   | 3.83   | 3.86   | 3.76   |
| Ta                               | 1.17   | 1.14   | 0.77   | 0.80   | 0.79   | 0.61   | 0.63   | 0.62   | 0.64   |
| Pb                               | 6.74   | 10.22  | 8.25   | 8.48   | 6.60   | 17.01  | 16.91  | 16.62  | 17.00  |
| Th                               | 34.77  | 35.70  | 10.11  | 10.21  | 10.53  | 12.28  | 13.23  | 12.68  | 12.52  |
| U                                | 4.84   | 5.46   | 1.12   | 1.13   | 1.28   | 2.53   | 2.60   | 2.59   | 2.61   |

| Sample                           | 19T012 | 19T013 | 19T014 | 19T015 | 19T163 | 19T164 | 19T165 | 19T166 | 19T167 |
|----------------------------------|--------|--------|--------|--------|--------|--------|--------|--------|--------|
| SiO <sub>2</sub>                 | 56.34  | 56.39  | 56.32  | 56.65  | 60.46  | 60.45  | 60.38  | 57.21  | 58.91  |
| TiO <sub>2</sub>                 | 0.81   | 0.80   | 0.79   | 0.83   | 0.70   | 0.70   | 0.70   | 0.75   | 0.71   |
| Al <sub>2</sub> O <sub>3</sub>   | 16.85  | 17.03  | 17.18  | 16.66  | 16.29  | 16.29  | 16.51  | 17.38  | 16.32  |
| Fe <sub>2</sub> O <sub>3</sub> T | 7.84   | 7.89   | 7.95   | 7.81   | 5.95   | 6.09   | 6.00   | 6.22   | 6.12   |
| MnO                              | 0.12   | 0.12   | 0.12   | 0.14   | 0.07   | 0.07   | 0.07   | 0.11   | 0.10   |
| MgO                              | 4.06   | 4.11   | 4.20   | 3.66   | 2.90   | 3.00   | 3.04   | 2.50   | 3.06   |
| CaO                              | 7.31   | 7.46   | 7.52   | 7.55   | 4.55   | 4.56   | 4.71   | 5.96   | 6.18   |
| Na <sub>2</sub> O                | 2.66   | 2.67   | 2.65   | 2.65   | 4.48   | 4.56   | 4.30   | 5.03   | 3.52   |
| K <sub>2</sub> O                 | 1.89   | 1.87   | 1.82   | 2.02   | 2.19   | 1.97   | 2.28   | 0.72   | 2.16   |
| P <sub>2</sub> O <sub>5</sub>    | 0.16   | 0.16   | 0.15   | 0.17   | 0.15   | 0.15   | 0.15   | 0.16   | 0.15   |
| LOI                              | 1.53   | 1.33   | 1.29   | 1.98   | 1.88   | 1.91   | 1.85   | 4.07   | 2.44   |
| Li                               | 16.8   | 16.8   | 16.5   | 20.6   | 18.7   | 20.7   | 19.7   | 31.7   | 22.2   |
| Be                               | 1.45   | 1.71   | 1.57   | 1.67   | 1.19   | 1.17   | 1.13   | 1.36   | 1.20   |
| Sc                               | 22.9   | 24.1   | 22.7   | 22.6   | 16.8   | 17.5   | 16.9   | 18.1   | 17.0   |
| Ti                               |        |        |        |        |        |        |        |        |        |
| V                                | 199    | 198    | 197    | 198    | 136    | 138    | 135    | 141    | 141    |
| Cr                               | 10.1   | 10.0   | 10.3   | 11.8   | 126    | 126    | 124    | 132    | 128    |
| Mn                               |        |        |        |        |        |        |        |        |        |
| Co                               | 20.4   | 20.7   | 20.6   | 19.4   | 16.6   | 17.8   | 16.8   | 19.2   | 20.0   |
| Ni                               | 3.44   | 3.49   | 3.21   | 4.07   | 46.0   | 46.8   | 45.3   | 53.0   | 53.5   |
| Cu                               | 10.4   | 10.5   | 10.2   | 13.8   | 21.9   | 20.9   | 20.0   | 21.4   | 18.4   |
| Zn                               | 73.4   | 75.7   | 73.4   | 77.7   | 53.6   | 57.5   | 54.2   | 72.5   | 59.6   |
| Ga                               | 18.7   | 18.9   | 18.6   | 19.0   | 16.6   | 16.8   | 16.7   | 19.0   | 18.1   |
| Rb                               | 85.0   | 83.5   | 80.8   | 92.5   | 79.7   | 74.2   | 81.1   | 26.9   | 82.3   |
| Sr                               | 294    | 297    | 295    | 294    | 460    | 468    | 454    | 593    | 467    |
| Y                                | 25.5   | 25.2   | 24.1   | 26.7   | 17.8   | 18.3   | 17.3   | 19.8   | 18.1   |
| Zr                               | 141    | 138    | 133    | 151    | 125    | 128    | 125    | 128    | 122    |
| Nb                               | 8.0    | 7.9    | 7.6    | 8.5    | 6.18   | 6.49   | 6.24   | 6.55   | 6.16   |
| Sn                               | 1.94   | 1.91   | 1.81   | 1.86   | 1.10   | 1.02   | 1.02   | 1.02   | 0.97   |
| Cs                               | 4.28   | 4.26   | 4.03   | 4.41   | 1.06   | 1.01   | 1.30   | 3.74   | 2.08   |
| Ba                               | 329    | 328    | 313    | 348    | 451    | 421    | 475    | 289    | 497    |
| La                               | 28.0   | 27.6   | 26.7   | 30.0   | 21.3   | 21.8   | 20.9   | 23.0   | 21.8   |
| Ce                               | 56.3   | 55.4   | 53.9   | 59.5   | 41.2   | 43.4   | 40.9   | 44.3   | 42.3   |
| Pr                               | 6.24   | 6.16   | 5.99   | 6.62   | 4.63   | 4.81   | 4.50   | 4.99   | 4.69   |
| Nd                               | 24.0   | 23.6   | 22.8   | 25.5   | 17.7   | 18.5   | 17.8   | 19.5   | 18.0   |
| Sm                               | 5.11   | 4.80   | 4.62   | 5.14   | 3.56   | 3.65   | 3.60   | 4.10   | 3.76   |
| Eu                               | 1.18   | 1.12   | 1.12   | 1.16   | 1.03   | 1.02   | 0.98   | 1.05   | 1.00   |
| Gd                               | 4.65   | 4.42   | 4.29   | 4.66   | 3.33   | 3.16   | 3.25   | 3.43   | 3.30   |
| Tb                               | 0.69   | 0.70   | 0.66   | 0.72   | 0.51   | 0.53   | 0.52   | 0.55   | 0.51   |
| Dy                               | 4.25   | 4.17   | 3.91   | 4.36   | 2.98   | 3.22   | 3.03   | 3.32   | 3.11   |
| Ho                               | 0.89   | 0.89   | 0.85   | 0.90   | 0.62   | 0.64   | 0.63   | 0.68   | 0.64   |
| Er                               | 2.53   | 2.43   | 2.41   | 2.68   | 1.69   | 1.70   | 1.71   | 1.86   | 1.70   |
| Tm                               | 0.37   | 0.36   | 0.35   | 0.38   | 0.25   | 0.24   | 0.24   | 0.27   | 0.26   |
| Yb                               | 2.46   | 2.44   | 2.36   | 2.63   | 1.60   | 1.58   | 1.60   | 1.72   | 1.70   |
| Lu                               | 0.37   | 0.37   | 0.35   | 0.39   | 0.25   | 0.24   | 0.24   | 0.27   | 0.25   |
| Hf                               | 3.80   | 3.54   | 3.58   | 3.90   | 3.47   | 3.48   | 3.41   | 3.55   | 3.33   |
| Ta                               | 0.62   | 0.58   | 0.59   | 0.66   | 0.47   | 0.46   | 0.44   | 0.47   | 0.46   |
| Pb                               | 16.97  | 16.81  | 15.89  | 16.18  | 9.51   | 9.54   | 9.55   | 15.6   | 11.7   |
| Th                               | 12.60  | 12.39  | 12.15  | 14.30  | 9.44   | 9.20   | 9.10   | 9.39   | 8.89   |
| U                                | 2.58   | 2.55   | 2.48   | 2.85   | 1.99   | 2.10   | 1.91   | 1.89   | 1.80   |

| Sample                           | 18T062 | 18T063 | 18T064 | 18T065 | 18T066 | 18T067 | 18T318 | 18T319 | 18T320 |
|----------------------------------|--------|--------|--------|--------|--------|--------|--------|--------|--------|
| SiO <sub>2</sub>                 | 69.06  | 69.16  | 69.02  | 68.93  | 68.94  | 69.91  | 76.25  | 77.87  | 77.27  |
| TiO <sub>2</sub>                 | 0.36   | 0.34   | 0.40   | 0.39   | 0.37   | 0.36   | 0.23   | 0.16   | 0.19   |
| Al <sub>2</sub> O <sub>3</sub>   | 15.31  | 15.58  | 15.40  | 15.12  | 15.33  | 15.27  | 12.66  | 12.26  | 12.42  |
| Fe <sub>2</sub> O <sub>3</sub> T | 3.13   | 2.93   | 3.46   | 3.36   | 3.34   | 3.35   | 1.15   | 0.92   | 0.94   |
| MnO                              | 0.06   | 0.05   | 0.06   | 0.06   | 0.06   | 0.05   | 0.02   | 0.02   | 0.02   |
| MgO                              | 1.28   | 1.27   | 1.42   | 1.43   | 1.45   | 1.27   | 0.37   | 0.16   | 0.25   |
| CaO                              | 3.17   | 3.23   | 3.20   | 3.05   | 2.83   | 3.01   | 0.86   | 0.52   | 0.61   |
| Na <sub>2</sub> O                | 2.76   | 2.90   | 2.82   | 2.67   | 2.92   | 2.92   | 3.12   | 3.15   | 3.01   |
| K <sub>2</sub> O                 | 4.06   | 3.90   | 3.53   | 4.20   | 3.88   | 3.48   | 5.21   | 4.90   | 5.26   |
| P <sub>2</sub> O <sub>5</sub>    | 0.15   | 0.11   | 0.11   | 0.13   | 0.10   | 0.09   | 0.07   | 0.03   | 0.05   |
| LOI                              | 1.10   | 0.94   | 1.12   | 1.10   | 1.36   | 1.03   | 0.57   | 0.67   | 0.61   |
| Li                               | 32.44  | 41.37  | 38.55  | 38.27  | 42.08  | 41.70  | 38.51  | 12.75  | 20.22  |
| Be                               | 2.27   | 2.17   | 2.15   | 2.25   | 2.17   | 2.09   | 5.28   | 5.32   | 4.74   |
| Sc                               | 10.8   | 17.4   | 11.8   | 21.9   | 11.2   | 11.5   | 7.04   | 4.84   | 5.71   |
| Ti                               | 2122   | 1946   | 2330   | 2583   | 2143   | 2105   | 1323   | 817    | 1027   |
| V                                | 67.9   | 62.7   | 75.0   | 79.7   | 66.3   | 67.9   | 17.1   | 15.6   | 16.2   |
| Cr                               | 11.1   | 10.7   | 14.2   | 16.2   | 12.9   | 10.0   | 9.7    | 9.7    | 10.1   |
| Mn                               | 453.7  | 413.2  | 488.2  | 527.8  | 440.7  | 402.2  | 129.1  | 125.6  | 167.9  |
| Co                               | 9.57   | 8.86   | 10.34  | 11.23  | 10.17  | 9.79   | 2.46   | 1.31   | 1.48   |
| Ni                               | 6.36   | 5.77   | 11.43  | 6.32   | 8.18   | 6.97   | 4.27   | 3.09   | 3.72   |
| Cu                               | 5.48   | 5.77   | 10.72  | 5.17   | 21.30  | 5.32   | 1.66   | 1.54   | 1.53   |
| Zn                               | 45.35  | 53.26  | 61.64  | 57.56  | 54.95  | 54.85  | 18.78  | 15.05  | 9.90   |
| Ga                               | 18.8   | 18.6   | 19.4   | 15.4   | 19.2   | 19.9   | 17.1   | 15.1   | 16.8   |
| Rb                               | 241    | 231    | 236    | 178    | 242    | 255    | 390    | 368    | 393    |
| Sr                               | 185    | 182    | 176    | 189    | 246    | 166    | 89     | 55     | 87     |
| Y                                | 24.4   | 22.0   | 21.5   | 28.1   | 24.5   | 25.4   | 10.9   | 8.6    | 13.9   |
| Zr                               | 112    | 131    | 138    | 148    | 127    | 161    | 133    | 101    | 130    |
| Nb                               | 15.7   | 15.0   | 12.1   | 17.8   | 16.4   | 16.3   | 16.7   | 15.5   | 16.9   |
| Sn                               | 2.65   | 2.38   | 2.73   | 2.25   | 1.94   | 2.04   | 2.06   | 1.44   | 2.64   |
| Cs                               | 10.19  | 11.21  | 12.10  | 17.90  | 10.91  | 14.74  | 15.02  | 10.51  | 10.36  |
| Ba                               | 261    | 235    | 231    | 257    | 240    | 235    | 140    | 102    | 168    |
| La                               | 32.0   | 27.8   | 28.9   | 29.3   | 27.1   | 29.9   | 42.1   | 44.7   | 42.6   |
| Ce                               | 64.2   | 55.5   | 59.6   | 58.5   | 55.7   | 62.9   | 82.7   | 71.0   | 72.9   |
| Pr                               | 7.99   | 6.90   | 7.32   | 7.31   | 6.89   | 7.51   | 7.38   | 6.23   | 6.74   |
| Nd                               | 29.3   | 25.3   | 27.4   | 27.7   | 25.3   | 27.2   | 22.3   | 16.5   | 19.1   |
| Sm                               | 6.34   | 5.46   | 5.92   | 6.34   | 5.63   | 5.93   | 3.36   | 1.95   | 2.62   |
| Eu                               | 0.86   | 0.85   | 0.82   | 0.55   | 0.80   | 0.82   | 0.52   | 0.26   | 0.38   |
| Gd                               | 5.83   | 5.13   | 5.31   | 5.41   | 5.28   | 5.55   | 3.09   | 1.98   | 2.51   |
| Tb                               | 0.89   | 0.78   | 0.80   | 0.61   | 0.85   | 0.87   | 0.36   | 0.20   | 0.30   |
| Dy                               | 4.79   | 4.32   | 4.27   | 4.63   | 4.61   | 4.92   | 1.85   | 0.91   | 1.48   |
| Ho                               | 0.99   | 0.89   | 0.88   | 0.68   | 0.96   | 1.00   | 0.38   | 0.20   | 0.34   |
| Er                               | 2.38   | 2.12   | 2.06   | 2.21   | 2.35   | 2.47   | 1.03   | 0.62   | 0.94   |
| Tm                               | 0.39   | 0.35   | 0.35   | 0.26   | 0.40   | 0.42   | 0.19   | 0.11   | 0.18   |
| Yb                               | 2.51   | 2.23   | 2.15   | 2.30   | 2.62   | 2.64   | 1.39   | 0.95   | 1.37   |
| Lu                               | 0.34   | 0.30   | 0.30   | 0.35   | 0.36   | 0.36   | 0.22   | 0.16   | 0.22   |
| Hf                               | 3.55   | 3.89   | 4.10   | 4.28   | 3.88   | 4.74   | 4.07   | 3.64   | 4.15   |
| Ta                               | 1.33   | 1.27   | 1.38   | 1.45   | 1.48   | 1.41   | 1.73   | 1.56   | 1.89   |
| Pb                               | 26.19  | 24.71  | 16.49  | 22.39  | 17.94  | 19.78  | 34.43  | 32.93  | 34.25  |
| Th                               | 24.91  | 22.31  | 23.98  | 18.12  | 22.90  | 22.86  | 35.38  | 32.41  | 35.56  |
| U                                | 3.17   | 2.68   | 2.79   | 2.15   | 3.90   | 2.20   | 3.67   | 3.69   | 4.22   |

| Sample                           | 18T321 | 18T322 | 18T323 | 18T324 | 18T325 | 18T326 | 18T327 | 18T328 | 18T039 |
|----------------------------------|--------|--------|--------|--------|--------|--------|--------|--------|--------|
| SiO <sub>2</sub>                 | 77.57  | 77.28  | 77.96  | 77.12  | 74.20  | 68.71  | 73.08  | 75.13  | 68.07  |
| TiO <sub>2</sub>                 | 0.14   | 0.20   | 0.21   | 0.16   | 0.34   | 0.44   | 0.36   | 0.29   | 0.48   |
| Al <sub>2</sub> O <sub>3</sub>   | 12.51  | 12.10  | 11.91  | 12.12  | 13.40  | 15.81  | 13.93  | 12.99  | 15.20  |
| Fe <sub>2</sub> O <sub>3</sub> T | 0.68   | 1.10   | 1.16   | 0.96   | 1.92   | 2.66   | 2.01   | 1.74   | 3.41   |
| MnO                              | 0.02   | 0.02   | 0.02   | 0.02   | 0.05   | 0.06   | 0.05   | 0.04   | 0.06   |
| MgO                              | 0.15   | 0.33   | 0.31   | 0.19   | 0.68   | 0.96   | 0.72   | 0.57   | 1.67   |
| CaO                              | 0.64   | 0.80   | 0.97   | 0.62   | 1.63   | 2.41   | 1.66   | 1.41   | 3.27   |
| Na <sub>2</sub> O                | 3.38   | 3.08   | 2.98   | 2.67   | 3.58   | 4.02   | 3.63   | 3.34   | 3.94   |
| K <sub>2</sub> O                 | 4.99   | 4.89   | 5.01   | 6.29   | 4.54   | 4.89   | 4.79   | 4.73   | 3.37   |
| P <sub>2</sub> O <sub>5</sub>    | 0.02   | 0.05   | 0.06   | 0.03   | 0.12   | 0.17   | 0.12   | 0.10   | 0.17   |
| LOI                              | 0.45   | 0.49   | 0.25   | 0.36   | 0.40   | 0.48   | 0.43   | 0.36   | 0.61   |
| Li                               | 21.67  | 45.43  | 35.61  | 31.92  | 53.11  | 47.44  | 48.27  | 38.41  | 42.3   |
| Be                               | 5.56   | 4.47   | 3.49   | 2.55   | 5.15   | 3.81   | 5.60   | 6.69   | 3.25   |
| Sc                               | 6.10   | 8.35   | 5.62   | 4.93   | 10.83  | 12.14  | 9.47   | 8.30   | 14.8   |
| Ti                               | 796    | 1055   | 1203   | 879    | 2413   | 2636   | 2201   | 1717   | 2795   |
| V                                | 20.2   | 19.6   | 18.5   | 12.6   | 33.2   | 43.7   | 29.4   | 24.0   | 57.3   |
| Cr                               | 79.2   | 7.5    | 4.7    | 7.6    | 20.0   | 15.1   | 10.5   | 11.5   | 22.4   |
| Mn                               | 174.5  | 109.3  | 186.2  | 141.1  | 414.8  | 431.3  | 427.2  | 324.9  | 476.8  |
| Co                               | 3.28   | 2.80   | 2.39   | 1.61   | 5.71   | 7.39   | 5.62   | 4.39   | 15.69  |
| Ni                               | 44.60  | 2.85   | 1.79   | 2.19   | 8.59   | 6.67   | 4.23   | 4.34   | 18.24  |
| Cu                               | 54.99  | 1.35   | 1.68   | 0.87   | 4.09   | 4.02   | 2.75   | 2.92   | 7.25   |
| Zn                               | 18.58  | 22.16  | 14.35  | 18.01  | 32.91  | 42.55  | 38.55  | 26.57  | 51.19  |
| Ga                               | 11.1   | 16.3   | 15.4   | 15.3   | 16.2   | 21.6   | 21.8   | 19.1   | 19.1   |
| Rb                               | 265    | 367    | 322    | 290    | 243    | 303    | 381    | 357    | 173    |
| Sr                               | 87     | 48     | 121    | 125    | 226    | 349    | 213    | 181    | 289    |
| Y                                | 6.2    | 11.5   | 12.6   | 14.1   | 18.2   | 20.9   | 20.5   | 20.3   | 18.7   |
| Zr                               | 82     | 105    | 131    | 82     | 208    | 246    | 183    | 168    | 211    |
| Nb                               | 15.4   | 12.8   | 13.5   | 12.5   | 18.6   | 16.6   | 21.9   | 23.1   | 12.2   |
| Sn                               | 1.81   | 2.30   | 2.47   | 2.29   | 3.92   | 4.22   | 3.87   | 3.36   | 3.65   |
| Cs                               | 15.21  | 10.84  | 10.79  | 11.55  | 15.29  | 10.76  | 11.74  | 10.86  | 11.73  |
| Ba                               | 102    | 78     | 164    | 187    | 265    | 567    | 243    | 253    | 397    |
| La                               | 21.6   | 42.5   | 39.1   | 33.6   | 60.1   | 44.9   | 58.5   | 52.0   | 34.7   |
| Ce                               | 43.5   | 72.1   | 73.6   | 64.7   | 106.5  | 91.1   | 103.5  | 93.6   | 68.0   |
| Pr                               | 3.36   | 6.54   | 7.49   | 6.04   | 11.32  | 11.13  | 11.63  | 10.42  | 7.92   |
| Nd                               | 9.9    | 18.3   | 23.6   | 18.2   | 36.5   | 39.2   | 37.9   | 33.8   | 27.2   |
| Sm                               | 1.34   | 2.28   | 3.61   | 2.65   | 5.47   | 6.69   | 5.88   | 5.34   | 4.68   |
| Eu                               | 0.22   | 0.33   | 0.57   | 0.54   | 0.57   | 1.28   | 0.89   | 0.79   | 1.04   |
| Gd                               | 1.15   | 2.26   | 3.26   | 2.49   | 4.35   | 5.78   | 5.26   | 4.68   | 4.28   |
| Tb                               | 0.10   | 0.24   | 0.41   | 0.31   | 0.38   | 0.77   | 0.67   | 0.63   | 0.60   |
| Dy                               | 0.75   | 1.23   | 2.13   | 1.65   | 2.67   | 3.96   | 3.51   | 3.37   | 3.31   |
| Ho                               | 0.11   | 0.28   | 0.47   | 0.36   | 0.41   | 0.82   | 0.74   | 0.74   | 0.72   |
| Er                               | 0.42   | 0.81   | 1.25   | 1.01   | 1.43   | 2.08   | 1.97   | 1.99   | 1.80   |
| Tm                               | 0.06   | 0.15   | 0.23   | 0.18   | 0.19   | 0.35   | 0.35   | 0.37   | 0.31   |
| Yb                               | 0.65   | 1.19   | 1.62   | 1.31   | 1.88   | 2.23   | 2.51   | 2.63   | 2.09   |
| Lu                               | 0.11   | 0.20   | 0.24   | 0.20   | 0.33   | 0.32   | 0.37   | 0.39   | 0.30   |
| Hf                               | 2.78   | 3.30   | 3.92   | 2.85   | 5.57   | 6.24   | 5.23   | 5.20   | 5.19   |
| Ta                               | 1.67   | 1.20   | 1.53   | 1.50   | 1.85   | 1.59   | 2.50   | 3.05   | 1.16   |
| Pb                               | 98.43  | 32.02  | 31.15  | 42.28  | 30.46  | 34.79  | 35.02  | 31.99  | 26.11  |
| Th                               | 21.65  | 38.20  | 29.52  | 34.80  | 27.80  | 35.91  | 31.16  | 29.04  | 27.85  |
| U                                | 2.53   | 4.02   | 3.83   | 3.40   | 4.91   | 4.55   | 8.84   | 11.96  | 5.30   |

| Sample                           | 18T040 | 18T041 | 18T042 | 18T043 | 18T044 | 18T045 | 18T046 | 18T047 | 18T048 |
|----------------------------------|--------|--------|--------|--------|--------|--------|--------|--------|--------|
| SiO <sub>2</sub>                 | 69.10  | 69.11  | 67.81  | 68.43  | 68.48  | 62.83  | 60.23  | 61.77  | 70.60  |
| TiO <sub>2</sub>                 | 0.50   | 0.43   | 0.49   | 0.41   | 0.48   | 0.83   | 0.78   | 0.77   | 0.41   |
| Al <sub>2</sub> O <sub>3</sub>   | 14.68  | 15.55  | 15.22  | 15.55  | 15.38  | 16.00  | 15.60  | 15.14  | 14.52  |
| Fe <sub>2</sub> O <sub>3</sub> T | 3.32   | 2.68   | 3.51   | 2.83   | 2.98   | 5.15   | 6.29   | 5.20   | 2.33   |
| MnO                              | 0.06   | 0.05   | 0.06   | 0.05   | 0.05   | 0.10   | 0.16   | 0.13   | 0.05   |
| MgO                              | 1.70   | 1.36   | 1.66   | 1.42   | 1.47   | 3.03   | 4.20   | 3.64   | 1.21   |
| CaO                              | 2.88   | 3.08   | 3.13   | 3.01   | 3.00   | 4.80   | 5.30   | 4.76   | 2.47   |
| Na <sub>2</sub> O                | 3.60   | 3.89   | 3.69   | 3.94   | 3.84   | 4.40   | 4.58   | 3.93   | 3.58   |
| K <sub>2</sub> O                 | 3.97   | 3.69   | 3.86   | 3.73   | 3.79   | 1.79   | 1.81   | 3.31   | 4.42   |
| P <sub>2</sub> O <sub>5</sub>    | 0.16   | 0.14   | 0.17   | 0.13   | 0.15   | 0.36   | 0.27   | 0.25   | 0.13   |
| LOI                              | 0.60   | 0.65   | 0.54   | 0.57   | 0.50   | 0.61   | 0.97   | 0.82   | 0.52   |
| Li                               | 44.1   | 42.6   | 40.4   | 43.9   | 39.9   | 62.1   | 61.4   | 46.0   | 49.2   |
| Be                               | 2.99   | 3.37   | 2.94   | 3.91   | 3.04   | 4.34   | 6.69   | 3.81   | 3.57   |
| Sc                               | 14.8   | 12.1   | 16.4   | 13.7   | 11.4   | 16.4   | 22.0   | 15.0   | 12.1   |
| Ti                               | 3033   | 2822   | 3001   | 2785   | 2799   | 5019   | 5284   | 4666   | 2425   |
| V                                | 60.7   | 51.5   | 60.6   | 57.9   | 48.8   | 96     | 108    | 93.7   | 42.9   |
| Cr                               | 21.3   | 17.6   | 24.1   | 23.3   | 21.7   | 44.4   | 123    | 68.3   | 18.7   |
| Mn                               | 479.1  | 387.8  | 459.7  | 418.7  | 398.4  | 818    | 1351   | 992    | 354.1  |
| Co                               | 13.13  | 12.15  | 13.48  | 11.65  | 11.19  | 16.9   | 21.2   | 17.4   | 9.64   |
| Ni                               | 18.23  | 17.17  | 19.01  | 19.23  | 17.63  | 26.9   | 61.2   | 46.7   | 15.34  |
| Cu                               | 10.29  | 11.23  | 15.17  | 11.17  | 9.40   | 35.5   | 56.8   | 44.9   | 15.44  |
| Zn                               | 64.09  | 51.63  | 75.59  | 51.65  | 55.08  | 87.3   | 125.4  | 92.4   | 39.67  |
| Ga                               | 18.6   | 15.4   | 19.6   | 15.7   | 18.6   | 22.2   | 19.1   | 19.9   | 18.4   |
| Rb                               | 206    | 126    | 191    | 138    | 184    | 178    | 113    | 188    | 267    |
| Sr                               | 272    | 337    | 292    | 302    | 275    | 277    | 215    | 221    | 221    |
| Y                                | 24.0   | 22.6   | 28.5   | 21.9   | 22.2   | 20.6   | 53.5   | 32.7   | 22.2   |
| Zr                               | 178    | 159    | 240    | 165    | 189    | 278    | 241    | 193    | 165    |
| Nb                               | 14.5   | 17.8   | 14.7   | 17.0   | 13.3   | 16.2   | 22.8   | 20.5   | 14.4   |
| Sn                               | 4.00   | 3.99   | 5.01   | 4.06   | 4.08   | 5.38   | 9.23   | 6.97   | 6.52   |
| Cs                               | 12.53  | 10.38  | 11.05  | 15.51  | 11.32  | 14.48  | 15.89  | 10.93  | 16.79  |
| Ba                               | 437    | 479    | 434    | 445    | 402    | 231    | 183    | 355    | 374    |
| La                               | 40.1   | 27.6   | 44.4   | 36.4   | 33.5   | 27.8   | 31.0   | 40.2   | 41.3   |
| Ce                               | 78.4   | 55.2   | 86.9   | 70.7   | 67.8   | 54.4   | 75.4   | 89.1   | 80.9   |
| Pr                               | 9.55   | 6.84   | 10.45  | 8.29   | 8.36   | 6.69   | 11.57  | 11.38  | 9.40   |
| Nd                               | 33.2   | 25.5   | 36.7   | 29.4   | 29.8   | 26.4   | 48.9   | 42.7   | 31.7   |
| Sm                               | 5.90   | 4.96   | 6.60   | 5.27   | 5.39   | 5.55   | 11.13  | 8.23   | 5.61   |
| Eu                               | 1.08   | 0.72   | 1.13   | 0.70   | 1.01   | 0.92   | 0.82   | 1.28   | 0.95   |
| Gd                               | 5.37   | 4.13   | 5.97   | 4.18   | 4.80   | 5.15   | 8.86   | 7.34   | 5.10   |
| Tb                               | 0.77   | 0.45   | 0.92   | 0.45   | 0.70   | 0.76   | 1.03   | 1.10   | 0.76   |
| Dy                               | 4.32   | 3.59   | 5.18   | 3.40   | 3.96   | 4.03   | 8.43   | 6.10   | 4.04   |
| Ho                               | 0.94   | 0.54   | 1.13   | 0.52   | 0.86   | 0.87   | 1.29   | 1.29   | 0.86   |
| Er                               | 2.33   | 1.79   | 2.74   | 1.77   | 2.19   | 2.04   | 4.35   | 3.21   | 2.20   |
| Tm                               | 0.40   | 0.22   | 0.46   | 0.22   | 0.37   | 0.33   | 0.54   | 0.55   | 0.36   |
| Yb                               | 2.51   | 1.97   | 2.92   | 1.94   | 2.46   | 2.13   | 4.90   | 3.55   | 2.36   |
| Lu                               | 0.35   | 0.29   | 0.39   | 0.29   | 0.33   | 0.33   | 0.77   | 0.51   | 0.32   |
| Hf                               | 4.44   | 3.95   | 5.90   | 4.16   | 4.77   | 6.64   | 6.04   | 4.97   | 4.47   |
| Ta                               | 1.55   | 1.33   | 1.56   | 1.37   | 1.50   | 1.07   | 1.60   | 1.86   | 1.78   |
| Pb                               | 27.27  | 29.06  | 29.16  | 31.11  | 28.84  | 19.86  | 21.18  | 29.13  | 28.83  |
| Th                               | 23.27  | 9.75   | 20.14  | 13.33  | 22.39  | 10.55  | 7.28   | 15.16  | 35.08  |
| U                                | 3.68   | 2.03   | 4.01   | 2.98   | 3.70   | 2.70   | 4.13   | 7.09   | 3.02   |

| Sample                           | 18T049 | 18T050 | 18T051 | AGV-2 | AGV-2 |
|----------------------------------|--------|--------|--------|-------|-------|
| SiO <sub>2</sub>                 | 70.97  | 70.25  | 70.35  |       |       |
| TiO <sub>2</sub>                 | 0.36   | 0.36   | 0.44   |       |       |
| Al <sub>2</sub> O <sub>3</sub>   | 14.66  | 15.15  | 14.38  |       |       |
| Fe <sub>2</sub> O <sub>3</sub> T | 2.38   | 2.21   | 2.65   |       |       |
| MnO                              | 0.04   | 0.04   | 0.05   |       |       |
| MgO                              | 1.11   | 1.12   | 1.27   |       |       |
| CaO                              | 2.42   | 2.60   | 2.53   |       |       |
| Na <sub>2</sub> O                | 3.68   | 3.90   | 3.68   |       |       |
| K <sub>2</sub> O                 | 4.30   | 4.26   | 4.17   |       |       |
| P <sub>2</sub> O <sub>5</sub>    | 0.12   | 0.12   | 0.14   |       |       |
| LOI                              | 0.59   | 0.58   | 0.60   |       |       |
| Li                               | 49.0   | 38.6   | 47.0   | 11.2  | 10.85 |
| Be                               | 3.32   | 4.05   | 3.69   | 2.14  | 2.24  |
| Sc                               | 10.5   | 10.3   | 12.0   | 13.7  | 13.19 |
| Ti                               | 2148   | 2123   | 2680   | 5859  | 6238  |
| V                                | 45.4   | 39.9   | 46.0   | 118   | 117   |
| Cr                               | 20.5   | 15.9   | 20.8   | 17.7  | 20.0  |
| Mn                               | 356.5  | 298.8  | 355.3  |       |       |
| Co                               | 8.94   | 8.07   | 10.19  | 15.9  | 15.6  |
| Ni                               | 15.33  | 12.94  | 16.75  | 18.3  | 19.0  |
| Cu                               | 11.79  | 12.09  | 12.48  |       |       |
| Zn                               | 40.26  | 49.68  | 40.97  |       |       |
| Ga                               | 18.2   | 18.7   | 19.0   | 22.3  | 20.3  |
| Rb                               | 243    | 252    | 254    | 64.9  | 66.6  |
| Sr                               | 227    | 235    | 221    | 664   | 655   |
| Y                                | 18.8   | 19.8   | 26.0   | 18.8  | 19.2  |
| Zr                               | 172    | 140    | 204    | 226   | 226   |
| Nb                               | 12.4   | 13.1   | 16.5   | 13.2  | 13.8  |
| Sn                               | 4.68   | 9.32   | 8.19   |       |       |
| Cs                               | 14.61  | 16.63  | 16.90  | 1.21  | 1.22  |
| Ba                               | 396    | 376    | 360    | 1095  | 1138  |
| La                               | 25.3   | 30.8   | 46.1   | 36.3  | 37.9  |
| Ce                               | 51.4   | 60.4   | 90.6   | 65.3  | 69.0  |
| Pr                               | 6.37   | 7.19   | 10.69  | 8.23  | 7.86  |
| Nd                               | 22.9   | 25.3   | 37.1   | 30.8  | 29.6  |
| Sm                               | 4.38   | 4.78   | 6.65   | 5.65  | 5.59  |
| Eu                               | 0.89   | 0.92   | 1.01   | 1.70  | 1.58  |
| Gd                               | 4.02   | 4.32   | 5.95   | 5.08  | 4.61  |
| Tb                               | 0.61   | 0.65   | 0.87   | 0.70  | 0.64  |
| Dy                               | 3.41   | 3.54   | 4.73   | 3.71  | 3.51  |
| Ho                               | 0.72   | 0.75   | 1.01   | 0.74  | 0.67  |
| Er                               | 1.81   | 1.87   | 2.49   | 1.78  | 1.80  |
| Tm                               | 0.31   | 0.32   | 0.43   | 0.28  | 0.26  |
| Yb                               | 2.01   | 2.06   | 2.74   | 1.70  | 1.62  |
| Lu                               | 0.28   | 0.29   | 0.38   | 0.23  | 0.25  |
| Hf                               | 4.48   | 3.82   | 5.52   | 5.00  | 5.07  |
| Ta                               | 1.52   | 1.67   | 2.23   | 0.86  | 0.77  |
| Pb                               | 32.00  | 26.53  | 30.93  | 13.4  | 12.8  |
| Th                               | 25.85  | 23.92  | 32.08  | 6.74  | 5.61  |
| U                                | 2.28   | 2.94   | 2.79   | 1.97  | 1.90  |

Note: AGV-2 is measured values of standards for 18T and 19T series of samples. Analysis of these international standards is in good agreement with recommended values.
